1 HIV-1 evolutionary dynamics under non-suppressive, 2<sup>nd</sup>-line protease-inhibitor containing  
2 antiretroviral therapy.

3

4 Steven A. Kemp<sup>1,3</sup>, Oscar Charles<sup>1</sup>, Anne Derache<sup>2</sup>, Collins Iwuji<sup>2,5</sup>, John Adamson<sup>2</sup>, Katya Govender<sup>2</sup>,  
5 Tulio de Oliveira<sup>2,6</sup>, Nonhlanhla Okesola<sup>2</sup>, Francois Dabis<sup>7,8</sup>, Darren P. Martin<sup>9</sup>, on behalf of the French  
6 National Agency for AIDS and Viral Hepatitis Research (ANRS) 12249 Treatment as Prevention (TasP)  
7 Study Group, Deenan Pillay<sup>1</sup>, Richard A. Goldstein<sup>1</sup> & Ravindra K. Gupta<sup>2,3</sup>

8

- 9 1. Division of Infection & Immunity, University College London, London, UK  
10 2. Africa Health Research Institute, Durban, South Africa  
11 3. Cambridge Institute of Therapeutic Immunology & Infectious Disease (CITIID), Cambridge,  
12 UK  
13 4. Department of Medicine, University of Cambridge, Cambridge, UK  
14 5. Research Department of Infection and Population Health, University College London, United  
15 Kingdom.  
16 6. KRISP - KwaZulu-Natal Research and Innovation Sequencing Platform, UKZN, Durban, South  
17 Africa.  
18 7. INSERM U1219-Centre Inserm Bordeaux Population Health, Université de Bordeaux, France.  
19 8. Université de Bordeaux, ISPED, Centre INSERM U1219-Bordeaux Population Health, France.  
20 9. Department of Integrative Biomedical Sciences, University of Cape Town, South Africa

21

22 Address for correspondence:

23 Steven A Kemp

24 Cambridge Institute for Therapeutic Immunology and Infectious Diseases

25 Jeffrey Cheah Biomedical Centre

26 Cambridge CB2 0AW, UK

27 [sk2137@cam.ac.uk](mailto:sk2137@cam.ac.uk)

28

29 or

30

31 Ravindra K Gupta

32 Cambridge Institute for Therapeutic Immunology and Infectious Diseases

33 Jeffrey Cheah Biomedical Centre

34 Cambridge CB2 0AW, UK

35 [Rkg20@cam.ac.uk](mailto:Rkg20@cam.ac.uk)

36 **Abstract**

37 Viral population dynamics in long term viraemic antiretroviral therapy (ART) treated individuals have  
38 not been well characterised. Prolonged virologic failure on 2<sup>nd</sup>-line protease inhibitor (PI) based ART  
39 without emergence of major protease mutations is well recognised, providing an opportunity to  
40 study within-host evolution.

41

42 Using next-generation Illumina short read sequencing and in silico haplotype reconstruction we  
43 analysed whole genome sequences from longitudinal plasma samples of eight chronically infected  
44 HIV-1 individuals failing 2<sup>nd</sup>-line regimens from the ANRS 12249 TasP trial, in the absence of high  
45 frequency major PI resistance mutations. Plasma drug levels were measured by HPLC. Three  
46 participants were selective for in-depth variant and haplotype analyses, each with five or more  
47 timepoints spanning at least 16 months. Recombination and linkage disequilibrium between  
48 haplotypes and genes was also explored.

49

50 During PI failure synonymous mutations were around twice as frequent as non-synonymous  
51 mutations across participants. Prior to or during exposure to PI, we observed several polymorphic  
52 amino acids in *gag* (e.g. T81A, T375N) which are have also been previously associated with exposure  
53 to protease inhibitor exposure. Although overall SNP frequency at abundance above 2% appeared  
54 stable across time in each individual, divergence from the consensus baseline sequence did increase  
55 over time. Non-synonymous changes were enriched in known polymorphic regions such as *env*  
56 whereas synonymous changes were more often observed to fluctuate in the conserved *pol* gene.  
57 Phylogenetic analyses of whole genome viral haplotypes demonstrated two common features:  
58 Firstly, evidence for selective sweeps following therapy switches or large changes in plasma drug  
59 concentrations, with hitchhiking of synonymous and non-synonymous mutations. Secondly,  
60 competition between multiple viral haplotypes that intermingled phylogenetically alongside soft  
61 selective sweeps. The diversity of viral populations was maintained between successive timepoints  
62 with ongoing viremia, particularly in *env*. Changes in haplotype dominance were often distinct from  
63 the dynamics of drug resistance mutations in *reverse transcriptase* (RT), indicating the presence of  
64 softer selective sweeps and/or recombination.

65

66 Large fluctuations in variant frequencies with diversification occur during apparently 'stable' viremia  
67 on non-suppressive ART. Reconstructed haplotypes provided further evidence for sweeps during  
68 periods of partial adherence, and competition between haplotypes during periods of low drug

69 exposure. Drug resistance mutations in RT can be used as markers of viral populations in the  
70 reservoir and we found evidence for loss of linkage disequilibrium for drug resistance mutations,  
71 indicative of recombination. These data imply that even years of exposure to PIs, within the context  
72 of large stable populations displaying ongoing selective competition, may not precipitate emergence  
73 of major PI resistance mutations, indicating significant fitness costs for such mutations. Ongoing viral  
74 diversification within reservoirs may compromise the goal of sustained viral suppression.  
75

## 76 Introduction

77 Even though HIV-1 infections are most commonly initiated with a single founder virus<sup>1</sup>, acute and  
78 chronic disease are characterised by extensive inter- and intra-participant genetic diversity<sup>2,3</sup>. The  
79 rate and degree of diversification is influenced by multiple factors, including selection pressures  
80 imposed by the adaptive immune system, exposure, and penetration of the virus to drugs, and  
81 tropism/fitness constraints relating to replication and cell-to-cell transmission in different tissue  
82 compartments<sup>4,5</sup>. During HIV-1 infection, high rates of reverse transcriptase- (RT) related mutation  
83 and high viral turnover during replication result in swarms of genetically diverse variants<sup>6</sup> which co-  
84 exist as quasispecies. Existing literature on HIV-1 intrahost population dynamics is largely limited to  
85 untreated infections, predominantly in subtype B infected individuals<sup>7-10</sup>. These works have shown  
86 non-linear diversification of virus away from the founder strain during chronic untreated infection.

87

88 Viral population dynamics in long-term viraemic antiretroviral therapy (ART) treated individuals have  
89 not been well characterised. HIV rapidly accumulates drug-resistance associated mutations (DRMs),  
90 particularly during non-suppressive 1<sup>st</sup>-line ART<sup>5,11</sup>. As a result, ART-experienced participants failing  
91 1<sup>st</sup>-line regimens for prolonged periods of time are characterised by high frequencies of common  
92 nucleoside reverse transcriptase (NRTI) and non-nucleoside reverse transcriptase (NNRTI) drug  
93 resistance mutations (DRMs) such as M184V, K65R and K103N<sup>12</sup>. Routinely, 2<sup>nd</sup>-line ART regimens  
94 consist of two NRTIs and underpinned by a boosted protease inhibitor (PIs); PI DRMs are  
95 uncommonly reported<sup>13</sup> however, a situation that differs for less potent drugs used in the early PI  
96 era<sup>5</sup>. A number of studies have indicated that less well characterised mutations accumulating in the  
97 *gag* gene during PI failure might impact PI susceptibility<sup>14-20</sup>, though common pathways have been  
98 difficult to discern, likely reflecting plasticity to drug escape.

99

100 Prolonged virological failure on PI-based regimens, without emergence of PI DRMs provides an  
101 opportunity to study evolution under partially-suppressive ART. The process of selective sweeps in  
102 the context of HIV-1 infection has previously been described<sup>21,22</sup> and it was reported that major PI  
103 DRMs and other non-synonymous mutations in regulatory regions such as *pol*, significantly lower  
104 fitness<sup>2,23,24</sup>. However, this has been typically shown outside of the context of longitudinal sampling.  
105 HIV has been shown to exhibit significant genetic diversity within infected hosts, with different  
106 populations of virus accumulating beneficial mutations – these are referred to as ‘quasispecies’<sup>25,26</sup>.  
107 By sampling participants consistently over several years, we propose that ongoing evolution is driven  
108 by the dynamic flux between selection, recombination, and genetic drift.

109

110 We have deployed next-generation sequencing of stored blood plasma specimens from participants  
111 in the Treatment as Prevention (TasP) ANRS 12249 study <sup>27</sup>, conducted in Kwazulu-Natal, South  
112 Africa. All participants were infected with HIV-1 subtype C and characterised as failing 2<sup>nd</sup>-line  
113 regimens containing Lopinavir and Ritonavir (LPV/r), with prolonged virological failure in the absence  
114 of major PI mutations <sup>28</sup>. In this manuscript, we report details of evolutionary dynamics during non-  
115 suppressive 2<sup>nd</sup>-line ART, through investigation of individual individual quasispecies using a novel  
116 computational haplotype reconstruction tool, Haplotype Reconstruction of Longitudinal Deep  
117 sequencing data (HaROLD, <sup>29</sup>.

118

## 119 **Results**

### 120 **Participant Characteristics**

121 Eight south African participants with virological failure of 2<sup>nd</sup>-line PI based ART and at least two  
122 timepoints, with viraemia above 1000 copies/ml were selected from the French ANRS TasP trial for  
123 viral dynamic analysis. Participant metadata collected included viral loads, regimens and time since  
124 ART initiation (**Table 1**). HIV RNA was isolated from venous blood samples and subject to whole-  
125 genome sequencing (WGS) using Illumina technology; from this whole-genome haplotypes were  
126 reconstructed. Prior to participation in the TasP trial, participants accessed 1st-line regimens for an  
127 average of 5.6yrs ( $\pm 2.7$ yrs). At baseline enrolment into TasP (whilst failing 1<sup>st</sup>-line regimens), median  
128 viral load was  $4.96 \times 10^{10}$  (IQR:  $4.17 \times 10^{10} - 5.15 \times 10^{10}$ ); 12 DRMs were found at a threshold of >2%; the  
129 most common of which were RT mutations K103N, M184V and P225H, consistent with previous use  
130 of d4T, NVP, EFV and FTC/3TC. Six of the eight participants had DRMs associated with PI failure at  
131 minority frequencies (average 6.4%) and usually at single timepoints throughout the longitudinal  
132 sampling. Observed mutations included L23I, I47V, M46I/L, G73S, V82A, N83D and I85V  
133 (**Supplementary Tables 1a-3c**). Viral populations of four of the eight participants also carried major  
134 integrase strand inhibitor (INSTI) mutations, at minority frequencies (average 5.0%) and usually at  
135 single timepoints (T97A, E138K, Y143H, Q148K).

136

137

### 138 **SNP frequencies and measures of diversity/divergence over time**

139 WGS data was used to measure the changing frequencies of viral single nucleotide polymorphisms  
140 (SNPs) relative to a dual-tropic subtype C reference sequence (AF411967) within individuals over  
141 time (**Figure 1a-b**). The number of longitudinal synonymous SNPs approximately mirrored the  
142 number of non-synonymous SNPs, but the former were two-to-three-fold more common. In most  
143 participants, viral populations were homogenous. Diversification, by counting the number of SNPs

144 difference to the reference sequence was considered. There was largely idiosyncratic changes in the  
145 number of SNPs over time, with both increases and decreases in number of SNPs, suggesting  
146 different population competition, or selective sweeps occurring. From timepoint two onwards (all  
147 participants now on 2<sup>nd</sup>-line, PI-containing regimens for >6 months), all participants (except 28545)  
148 had increases in both synonymous and non-synonymous SNPs.

149

150 In previous literature, chronically infected, but untreated HIV-1 patients viral populations showed  
151 some reversion to the founder or infecting virus<sup>7</sup>. We assessed this phenomenon in our chronically  
152 infected, but treated HIV-1 population. HIV-1, subtype C and M group consensus sequences were  
153 downloaded from the Los Alamos National Laboratory (LANL) database and an ‘ancestral’ consensus  
154 sequence was constructed according to the Materials and Methods. Diversification towards or away  
155 from the baseline (or infecting sequence) as well as both the subtype C and subtype M consensus  
156 was measured.

157

158 When considering the whole genome, linear regression suggests that all sequences continued to  
159 diversify away from the infecting/founder strain, though  $R^2$  and p-values suggests the diversification  
160 towards or away from the founder was not significant in most cases. Despite this, all participants  
161 appeared to diversify away from the infecting strain (**Figure 1C**), all but two participants (15664 &  
162 29447) diversified away from the ancestral subtype C (**Figure 1D**), and all but three participants  
163 (15664, 22828 & 29447) diversified away from the ancestral Subtype M (**Figure 1E**). This is contrary  
164 to current literature, and may be a novel feature for patients who fail 2<sup>nd</sup>-line regimens or  
165 sporadically adhere to therapies. To determine whether specific genomic regions were responsible  
166 for reversion or divergence, we re-examined the divergence from simulated ancestors across the  
167 genome in a sliding window of 1000bp (**Supplementary Figures 1-3**). This revealed that whilst there  
168 were heterogeneous patterns of divergence, when considering portions of each genome  
169 independently there was a general trend towards divergence, although curiously the regions 1-  
170 2000bp (covering the *gag* gene) appears to be show reversion (to the baseline strain). The highest  
171 degree of diversification occurred in regions 2000-3000bp and 7000-8000bp, corresponding to the  
172 *protease* and *reverse transcriptase* genes, and the *env* gene respectively. For any given patient their  
173 HIV genomes are able to both revert in part, and diverge in others, likely enabled by recombination  
174 which unlinks hyper-variable loci from strongly constrained neighboring sites.

175

176 To assess the relationship of the observed divergent patterns, we examined nucleotide diversity by  
177 considering all pairwise nucleotide distances of each consensus sequence, by timepoint and

178 participant using a multidimensional scaling approach<sup>30</sup>. Intra-participant nucleotide diversity varied  
179 considerably between participants (**Figure 2a**). Some participants showed little diversity between  
180 timepoints (e.g. participant 16207), whereas others showed higher diversity between timepoints  
181 (e.g. participant 22763). Some participants were tightly clustered, suggesting little change over time  
182 (**Figure 3a**, participants 16207, 26892 & 47939), compared to others (participants 22828 & 28545).  
183 To corroborate the MDS approach, we used a novel method of examining nucleotide diversity of  
184 longitudinal timepoints using all positional information from BAM files (**Supplementary Figure 4**).

185

#### 186 **Phylogenetic analysis of inferred haplotypes**

187 The preceding diversity assessments suggested the existence of distinct viral haplotypes within each  
188 participant. We therefore used a recently reported computational tool<sup>29</sup> to infer 289 unique  
189 haplotypes across all participants, with between 11 and 32 haplotypes (average 21) per participant.  
190 The number haplotypes changed dynamically between successive timepoints indicative of  
191 dynamically shifting populations (**Figure 2B**). To ensure that haplotypes were sensibly reconstructed,  
192 a phylogeny of all consensus sequences was also inferred (**Supplementary Figure 5**). Furthermore, to  
193 ensure that reconstructed haplotypes were sensible, a subsequent MDS plot of all viral haplotypes  
194 was constructed (**Supplementary Figure 6**).

195

#### 196 **Linkage Disequilibrium and Recombination**

197 LD between two pairwise loci is reduced by recombination, such that LD tends to be higher for loci  
198 that are close and lower for more distant loci<sup>31</sup>. HIV is known to rapidly recombine such that  
199 sequences are not generally in Linkage Disequilibrium (LD) beyond 400bp<sup>7</sup>. The significance of  
200 recombination in intra-host, single infection setting is less well understood<sup>32</sup>. To assess if intra-patient  
201 recombination was occurring between patient haplotypes for three most sampled participants, we  
202 determined LD decay patterns, assuming that if there was random recombination, this would equate  
203 to a smooth LD decay pattern. This was not observed, rather, each participant demonstrated a  
204 complex decay pattern, consistent with non-random recombination along the genome (**Figure 3A**).  
205 Given this, we characterized recombination patterns (**Figure 3b**). Perceived recombination  
206 breakpoints were recurrent within participants and identifiable over successive timepoints. DRMs  
207 were gained over successive timepoints for time for participant 22763 whereas in participant  
208 15664, the reverse was true, whereby the converse is seen for patient 15664, whereby there was a  
209 gradual loss of DRMs. This indicates that the not all DRMs were required to overcome sporadic drug  
210 pressure and the original drug-resistant virus with lower fitness was selected preferentially by ART

211 drug pressure. Participant 16207 had recombinant breakpoints localised in the the *pol* gene in two  
212 timepoints, though it retained its majority DRM (K103N) across all haplotype populations.

213

214

### 215 **Changing landscapes of non-synonymous and synonymous mutations**

216 In the absence of major PI mutations, we first examined non-synonymous mutations across the  
217 whole genome (**Figures 4-6**), with a specific focus on *pol* (to observe first and second line NRTI-  
218 associated mutations) and *gag* (given its involvement in PI susceptibility). We and others have  
219 previously shown that *gag* mutations accumulate during non-suppressive PI therapy<sup>33,34</sup>. There are  
220 also data suggesting associations between *env* mutations and PI exposure<sup>35,36</sup>. **Supplementary**  
221 **Tables 1-3** summarise the changes in variant frequencies of *gag*, *pol* and *env* mutations in  
222 participants over time. We found between two and four mutations at sites previously associated  
223 with PI resistance in each participant, all at persistently high frequencies (>90%) even in the absence  
224 of presumed drug pressure. This is explained by the fact that a significant proportion of sites  
225 associated with PI exposure are also polymorphic across HIV-1 subtypes<sup>18,37</sup>. To complement this  
226 analysis, we examined underlying synonymous mutations across the genome. This revealed complex  
227 changes in the frequencies of multiple nucleotide residues across all genes. These changes often  
228 formed distinct ‘chevron-like’ patterns between timepoints (**Figures 4c & 5b**), indicative of linked  
229 alleles dynamically shifting and suggestive of competition between viral haplotypes.

230

231 **Participant 15664** had consistently low drug plasma concentration of all drugs at each measured  
232 timepoint, with detectable levels measured only at month 15 and beyond (**Figure 4a**). At baseline,  
233 whilst on NNRTI-based 1<sup>st</sup>-line ART, known NRTI (M184V) and NNRTI (K103N and P225H) DRMs<sup>5</sup>  
234 were at high prevalence in the virus populations which is as expected whilst adhering to 1<sup>st</sup>-line  
235 treatments. Haplotype reconstruction and subsequent analysis inferred the presence of a majority  
236 haplotype carrying all three of these mutations at baseline, as well as a minority haplotype with the  
237 absence of P225H (**Figure 4d**, dark grey circles). Following the switch to a 2<sup>nd</sup>-line regimen, variant  
238 frequencies of M184V and P225H dropped below detection limits (<2% of reads), whilst K103N  
239 remained at high frequency (**Figure 4B**). Haplotype analysis was concordant, revealing that viruses  
240 with K103N, M184V and P225H were replaced by haplotypes with only K103N (**Figure 4D**, light grey  
241 circles). At timepoint two (month 8), there were also numerous synonymous mutations observed at  
242 high frequency in both *gag* and *pol* genes, corresponding with the switch to a 2<sup>nd</sup>-line regimen. At  
243 timepoint three (15 months post-switch to 2<sup>nd</sup>-line regimen) drug concentrations were highest,  
244 though still low in absolute terms, indicating partial adherence. Between timepoints three and four



245 we observed a two-log reduction in viral load, with modest change in frequency of RT DRMs.  
246 However, we observed synonymous variant frequency shifts predominantly in both *gag* and *pol*  
247 genes, as indicated by multiple variants increasing and decreasing contemporaneously, creating  
248 characteristic chevron patterning (**Figure 4b**). However many of the changes were between  
249 intermediate frequencies, (e.g. between 20% and 60%), which differed from changes between time  
250 points one and two where multiple variants changed more dramatically in frequency from <5% to  
251 more than 80%, indicating harder selective sweep. These data are in keeping with a soft selective  
252 sweep between time points three and five. Between timepoints five and six, the final two samples,  
253 there was another population shift - M184V and P225H frequencies fell below the detection limit at  
254 timepoint six, whereas the frequency of K103N dropped from almost 100% to around 75% (**Figure**  
255 **4b**). This was consistent with haplotype reconstruction, which inferred a dominant viral haplotype at  
256 timepoint six bearing only K103N, as well as a minor haplotype with no DRMs at all (**Figure 4d**, light  
257 blue circles). Several inferred haplotypes without DRMs was nonetheless phylogenetically distinct  
258 from the timepoint one minority haplotype (**Figure 4d**, compare small orange and pink circles in  
259 lowest clade).

260  
261 Upon examining the phylogenetic relationships of the inferred haplotype sequences, there were  
262 several distinct clades with haplotypes from all timepoints interspersed throughout (except at  
263 timepoint 4, which remained phylogenetically distinct). This is indicative of ongoing viral population  
264 competition. DRMs showed some segregation by clade; viruses carrying a higher frequency of DRMs  
265 were observed in upper cladea (Clade A, **Figure 4d**), and those with either K103N alone, or no DRMs  
266 were preferentially located in the upper clade (Clade C, **Figure 4d**). However, this relationship was  
267 not clear cut, and therefore consistent with competition between haplotypes during low drug  
268 exposure. Soft sweeps were evident, given the increasing diversity (**Figure 1, Supplementary Figure**  
269 **4**) of this participant, as well as constrained variant frequencies between 20-80% (**Figure 4b,c**).

270  
271 **Participant 16207.** Viral load in this participant were consistently elevated >10,000 copies/ml (**Figure**  
272 **5a**). As with participant 15664, drug concentrations in blood plasma remained extremely low or  
273 absent at each measured timepoint, consistent with non-adherence to the prescribed regimen.  
274 There was almost no change in the frequency of DRMs throughout the follow up period, even when  
275 making the switch to the 2<sup>nd</sup>-line regimen. NNRTI resistance mutations such as K103N are known to  
276 have minimal fitness costs<sup>24</sup> and can therefore persist in the absence of NNRTI pressure. Throughout  
277 treatment the participant maintained K103N at a frequency of >95% but also carried several  
278 integrase strand transfer inhibitor (INSTI) associated changes (E157Q) and PI-exposure associated

279 amino acid replacements (L23I and M46I) at low frequencies at timepoints two and three. Despite  
280 little change in DRM site frequencies, very significant viral population shifts were observed at the  
281 whole genome level, again indicative of selective sweeps (**Figures 5b-c**). Between timepoints one  
282 and four, several linked mutations changed abundance contemporaneously, generating chevron-like  
283 patterns of non-synonymous changes in *env* specifically (blue lines). A large number of alleles  
284 increased in frequency from <20% to >80% at the same time as numerous others decreased in  
285 frequency from above 80% to below 20%. Whereas large shifts in *gag* and *pol* alleles also occurred,  
286 the mutations involved were almost exclusively synonymous (red and green lines). These putative  
287 selective sweeps in *env* were evident in the phylogenetic analysis (**Figure 5d**, see long branch lengths  
288 between timepoints one and four, and cladal structure) possibly driven by neutralising antibodies  
289 and/or T-cell immune pressures.

290

291 Phylogenetic analysis of inferred whole genome haplotypes overall showed a distinct cladal  
292 structure as observed in 15664 (**Figure 5d**), although the dominant haplotypes were equally  
293 observed in the upper clade (A) and lower clade (C) (**Figure 5d**). K103N was the majority DRM at all  
294 timepoints, except for a minority haplotype at timepoint three, also carrying E157Q. Haplotypes did  
295 not cluster by time point. Significant diversity in haplotypes from this participant was confirmed by  
296 MDS (**Supplementary Figure 6**).

297

298 **Participant 22763** was notable for a number of large shifts in variant frequencies across multiple  
299 drug resistance associated residues and synonymous sites. Drug plasma concentration for different  
300 drugs was variable yet detectable at most measured timepoints reflecting changing levels of  
301 adherence across the treatment period (**Figure 6a**). Non-PI DRMs such as M184V, P225H and K103N  
302 were present at baseline (time of switch from first to second line treatments). These mutations  
303 persisted despite synonymous changes between time points one and two. Most of the highly  
304 variable synonymous changes in this participant were found in the *gag* and *pol* genes (as in  
305 participant 16207) (**Figure 6c**), but in this case *env* displayed large fluctuations in synonymous and  
306 non-synonymous allelic frequencies over time. At timepoint three, therapeutic concentrations of  
307 boosted lopinavir (LPV/r) and tenofovir (TDF) were measured in plasma and haplotypes clustered  
308 separately from the first two timepoints (**Figure 6d**, light and dark grey circles). NGS confirmed that  
309 the D67N, K219Q, K65R, L70R, M184V DRMs and NNRTI-resistance mutations were present at low  
310 frequencies from timepoint three onwards. Of note, between timepoints three and six, therapeutic  
311 concentration of TDF was detectable, and coincided with increased frequencies of the canonical TDF  
312 DRM, K65R<sup>5</sup>. The viruses carrying K65R outcompeted those carrying the thymidine analogue mutants

313 (TAMs) D67N and K70R, whilst the lamivudine (3TC) associated resistance mutation, M184V,  
314 persisted throughout. In the final three timepoints M46I emerged in *protease*, but never increased  
315 in frequency above <6%. At timepoint seven, populations shifted again with some haplotypes  
316 resembling those previously timepoint four, with D67N and K70R again being predominant over  
317 K65R in *reverse transcriptase* (Figure 6d, green and blue circles). At the final timepoint (eight) the  
318 frequency of K103N was approximately 85% and the TAM-bearing populations continued to  
319 dominate over the K65R population, which at this timepoint had a low frequency.

320

321 Although the DRM profile suggested the possibility of a selective sweep, we observed the same  
322 groups of other non-synonymous or synonymous alleles exhibiting dramatic frequency shifts, but to  
323 a lesser degree than in the previous two participants i.e. 'chevron patterns' were less pronounced,  
324 outside of the *env* gene (Figure 6b-c). Variable drug pressures placed on the viral populations  
325 throughout the 2<sup>nd</sup>-line regimen appear to have played some role in limiting haplotype diversity.  
326 Timepoints 1-4 all formed distinct clades, without intermingling, indicating that competition  
327 between populations was not occurring to the same degree as in previous participants. Some  
328 inferred haplotypes had K65R and others the TAMs D67N and K70R. K65R was not observed in  
329 combination with D67N or K70R, consistent with previously reported antagonism between K65R and  
330 TAMs whereby these mutations are not commonly found together within a single genome<sup>38-40</sup>. One  
331 possible explanation for the disconnect between the trajectories of DRM frequencies over time and  
332 haplotype phylogeny is competition between different viral populations. Alternatively, emergence of  
333 haplotypes from previously unsampled reservoir with different DRM profile is possible, but one  
334 might have expected other mutations to characterise such haplotypes that would manifest as  
335 change in frequencies of large numbers of other mutations.

336

### 337 Discussion

338 The proportion of people living with HIV (PLWH) accessing ART has increased from 24% in 2010, to  
339 68% in 2020<sup>41,42</sup>. However, with the scale-up of ART, there has also been an increase in both pre-  
340 treatment drug resistance (PDR)<sup>43,44</sup> and acquired drug resistance<sup>12,45</sup> to 1st-line ART regimens  
341 containing NNRTIs. Integrase inhibitors (specifically dolutegravir) are now recommended for first-  
342 line regimens by the WHO in regions where PDR exceeds 10%<sup>46</sup>. Boosted PI-containing regimens  
343 remain second line drugs following first 1<sup>st</sup>-line failure, though one unanswered question relates to  
344 the nature of viral populations during failure on PI-based ART where major mutations in *protease*,  
345 described largely for less potent PI, have not emerged. Here we have comprehensively analysed viral

346 populations present in longitudinally collected plasma samples of chronically-infected HIV-1  
347 participants under non-suppressive 2<sup>nd</sup>-line ART.

348

349 With the vast majority of PLWH treated in the post-ART era, virus dynamics during non-suppressive  
350 ART is important to understand, as there may be implications for future therapeutic success. For  
351 example broadly neutralising antibodies (bNab) are being tested not only for prevention, but also as  
352 part of remission strategies in combination with latency reversal agents. We know that HIV  
353 sensitivity to broadly neutralising antibodies (bNab) is dependent on *env* diversity<sup>47,48</sup>, and therefore  
354 prolonged ART failure with viral diversification could compromise sensitivity to these agents.

355

356 Our understanding of virus dynamics largely stems from studies that were limited to untreated  
357 individuals<sup>10</sup>, with largely subgenomic data analysed rather than whole genome<sup>10</sup>. Traditional  
358 analysis of quasispecies distribution, for example as reported by Yu et al<sup>49</sup>, suggests that the viral  
359 diversity increases in longitudinal samples. However the findings of Yu et al were based entirely on  
360 short-read NGS data without considering whole-genome haplotypes. The added benefit of  
361 examining whole genome is that linked mutations can be identified statistically using an approach  
362 that we recently developed<sup>29</sup>. Indeed haplotype reconstruction has proved beneficial in the analysis  
363 of compartmentalisation and diversification of several RNA viruses, including HIV-1, CMV and SARS-  
364 CoV-2<sup>33,50,51</sup>.

365

366 Key findings of this study were: firstly that diversity increased over time with variable trajectory  
367 away from the consensus baseline sequence and also the reconstructed ancestral subtype C and M  
368 consensus. Approximately half of the participants appeared to diversify away from the  
369 reconstructed ancestral subtype C and M sequence, whereas three participants showed possible  
370 reversion back towards the ancestral consensus C and M (albeit with insufficient statistical support).

371

372 Secondly, and in contrast to the fractions of synonymous and non-synonymous mutations reported  
373 by Zanini et al in a longitudinal untreated dataset<sup>2</sup>, we show that the fractions of synonymous  
374 mutations are generally two-to-three fold higher than non-synonymous mutations during non-  
375 suppressive ART in chronic infection. This finding may reflect early versus chronic infection and  
376 differing selective pressures. Haplotype reconstruction revealed evidence for competing haplotypes,  
377 with evidence for numerous soft selective sweeps in phylogenies, evidenced by intermingling of  
378 haplotypes during periods where there was low drug concentration measured in participant's blood  
379 plasma.

380

381 Individuals in the present study were treated with Ritonavir boosted Lopinavir along with two NRTIs  
382 (typically Tenofovir + Emtricitabine). We observed significant change in the frequencies of NRTI  
383 mutations in two of the three participants studied in-depth. These fluctuations likely reflected  
384 adherence to the 2<sup>nd</sup>-line regimen though we saw evidence for possible archived virus populations  
385 with DRMs emerging during follow-up because large changes in DRM frequency were not always  
386 accompanied by changes at other sites. This is consistent with soft sweeps occurring and that non-  
387 DRMs do not necessarily drift with other mutations to fixation<sup>21</sup> and that the same mutations are  
388 occurring on different backgrounds. As frequencies of RT DRMs did not always segregate with  
389 haplotype frequencies, we suggest that a high number of recombination events, known to be  
390 common in HIV infections, was responsible for the haplotypic diversity.

391

392 Although no participant developed major DRMS at consistently high frequencies to PIs  
393 (<https://hivdb.stanford.edu/dr-summary/resistance-notes/PI/>), we did observe non-synonymous  
394 mutations associated with PI exposure that are also known to be polymorphic; however, there was  
395 no temporal evidence of specific changes being associated with selective sweeps. For example PI  
396 exposure associated residues in matrix (positions 76 and 81) were observed in participant 16207  
397 prior to PI initiation<sup>52</sup>. Furthermore, participant 16207 was one of few participants who achieved  
398 two partial suppressions (<750 copies/ml). After both of these partial suppressions, the rebound  
399 populations appeared to be less diverse, consistent with drug-resistant virus re-emerging.

400

401 Mutations in all genes that are further apart than 100bp are subject to shuffling via recombination<sup>53</sup>.  
402 Unlike the smooth LD decay curve as reported in the literature, we identified complex LD decay  
403 patterns within patients, indicative of non-random recombination. Recombination appears as the  
404 loss and gain of common genomic regions over successive timepoints between each participant's  
405 haplotype populations (**Figure 3B**). Participant 15664 recombines between haplotype populations in  
406 the *vif* and *vpr* genes in four of the six timepoints. In contrast, participant 22763 showed  
407 recombination in the *gag-pol* genes in three of the eight timepoints. We explain these  
408 recombination events in longitudinal sequences, as reflected in the previously discussed 'chevron'  
409 patterns whereby variants increase and subsequently decrease between timepoints. HIV  
410 quasispecies allows the virus to increase fitness through recombination when selectively  
411 advantageous<sup>26</sup>. The relationship between recombination and acquisition of DRMs is unclear with  
412 each patient showing unique patterns; participant 16207 recombined in *pol* between haplotypes at  
413 timepoint two and six and maintained the major DRM K103N. Participant 22763 recombined in *pol*

414 at three timepoints (two, four and six) resulting in no change of DRMs, gain of DRMs, and loss of  
415 DRMs respectively. This occurring at the same time as antagonism between TAMs and DRMs (K65R  
416 and D67N). Finally, participant 15664 steadily lost DRMs throughout longitudinal sampling, although  
417 we did not see evidence of recombination driving this. This suggests that in the absence of strong  
418 drug pressures, viral populations only maintained crucial DRMs which were useful to evading innate  
419 immunity.

420

421 This study had some limitations – we examined in-detail only three participants with ongoing  
422 viraemia and variable adherence to 2<sup>nd</sup>-line drug regimens. Despite the small sample size, this type  
423 of longitudinal sampling of ART-experienced participants is unprecedented. We are confident that  
424 the combination of computational analyses has provided a detailed understanding of viral dynamics  
425 under non-suppressive ART may be applicable to wider datasets. The method used to reconstruct  
426 viral haplotypes *in silico* is novel and has previously been validated in HIV-positive participants with  
427 CMV<sup>50</sup>. We are confident that the approach implemented by HaROLD has accurately, if  
428 conservatively estimated haplotype frequencies and future studies should look to validate these  
429 frequencies using an *in vitro* method such as single genome amplification. Despite there being high  
430 viral loads present at each of the analysed timepoints, nuances of the sequencing method led in  
431 some cases to suboptimal degrees of gene coverage, particularly in the *env* gene. To ensure that  
432 uneven sequencing coverage did not bias our analyses, we ensured that variant analysis was only  
433 performed where coverage was >10 reads.

434

435 In summary we have found compelling evidence of HIV-1 within-host viral diversification,  
436 recombination and haplotype competition during non-suppressive ART. In future, participants  
437 failing PI-based regimens are likely to be switched to INSTI-based ART (specifically Dolutegravir in  
438 South Africa) prior to genotypic typing or resistance analysis. Although the prevalence of underlying  
439 major INSTI resistance mutations is low in sub-Saharan Africa<sup>54,55</sup>, this approach needs assessment  
440 given data linking individuals with NNRTI resistance with poorer virological outcomes on  
441 Dolutegravir<sup>56</sup>, coupled with a history of intermittent adherence. Having shown that long-time intra-  
442 host PI failure increases diversity of HIV viral populations, monitoring future drug-failure cases will  
443 be of interest due to their capacity to maintain a reservoir of drug-resistant and transmissible virus.

444

## 445 **Methods**

### 446 **Study & Participant selection**

447 This cohort was nested within the French ANRS 12249 Treatment as Prevention (TasP) trial<sup>27</sup>. TasP  
448 was a cluster-randomised trial comparing an intervention arm who offered ART after HIV diagnosis  
449 irrespective of participant CD4 + count, to a control arm which offered ART according to prevailing  
450 South African guidelines. A subset of 44 longitudinal samples from eight chronically infected  
451 participants. Participants were selected for examination if there were >3 timepoint samples  
452 available. All samples were collected from blood plasma. The Illumina MiSeq platform was used and  
453 an adapted protocol for sequencing<sup>57</sup>. Adherence to 2<sup>nd</sup>-line regimens was measured by HPLC using  
454 plasma concentration of drug levels as a proxy. Drug levels were measured at each timepoint with  
455 detectable viral loads, post-PI initiation.

456

457 Ethical approval was originally grant by the Biomedical Research Ethics Committee (BFC 104/11) at  
458 the University of KwaZulu-Natal, and the Medicines Control Council of South Africa for the TasP trial  
459 (Clinicaltrials.gov: [NCT01509508](https://clinicaltrials.gov/ct2/show/study/NCT01509508); South African Trial Register: DOH-27-0512-3974). The study was  
460 also authorized by the KwaZulu-Natal Department of Health in South Africa. Written informed  
461 consent was obtained from all participants. Original ethical approval also included downstream  
462 sequencing of blood plasma samples and analysis of those sequences to better understand drug  
463 resistance. No additional ethical approval was required for this.

464

#### 465 **Illumina Sequencing**

466 Sequencing of viral RNA was performed as previously described by Derache et al<sup>58</sup> using a modified  
467 protocol previously described by Gall et al<sup>59</sup>. Briefly, RNA was extracted from 1ml of plasma with  
468 detectable viral load of >1000 copies/ml, using QIAamp Viral RNA mini kits (Qiagen, Hilden,  
469 Germany), and eluted in 60µl of elution buffer. The near-full HIV genome was amplified with 4  
470 subtype C primers pairs, generating 4 overlapping amplicons of between 2100 and 3900kb.

471

472 DNA concentrations of amplicons were quantified with the Qubit dsDNA HS Assay kit (Invitrogen,  
473 Carlsbad, CA). Diluted amplicons were pooled equimolarly and prepared for library using the Nextera  
474 XT DNA Library preparation and the Nextera XT DNA sample preparation index kits (Illumina, San  
475 Diego, CA), following the manufacturer's protocol.

476

#### 477 **Genomics & Bioinformatics**

478 Poor quality reads (with Phred score <30) and adapter sequences were trimmed from FastQ files  
479 with TrimGalore! v0.6.519<sup>60</sup> and mapped to a clade C South African reference genome (AF411967)  
480 with BWA-MEM<sup>61</sup>. The reference genome was manually annotated in Geneious Prime v2020.3 with

481 DRMs according to the Stanford HivDB <sup>62</sup>. Optical PCR duplicate reads were removed using Picard  
482 tools (<http://broadinstitute.github.io/picard>). Finally, QualiMap2 <sup>63</sup> was used to assess the mean  
483 mapping quality scores and coverage in relation to the reference genome for the purpose of  
484 excluding poorly mapped sequences from further analysis. Single nucleotides polymorphisms (SNPs)  
485 were called using VarScan2 <sup>64</sup> with a minimum average quality of 20, minimum variant frequency of  
486 2% and in at least 10 reads. These were then annotated by gene, codon and amino acid alterations  
487 using an in-house script <sup>65</sup> modified to utilise HIV genomes.

488

489 All synonymous variants and DRMs were examined, and their frequency compared across successive  
490 timepoints. Synonymous variants were excluded from analysis if their prevalence remained at  $\leq 10\%$   
491 or  $\geq 90\%$  across all timepoints. DRMs were retained for analysis if they were present at over 2%  
492 frequency and on at least two reads. A threshold of 2% is supported by a study evaluating different  
493 analysis pipelines, which reported fewer discordances over this cut-off <sup>66</sup>.

494

#### 495 **Haplotype Reconstruction & Phylogenetics**

496 Whole-genome viral haplotypes were constructed for each participant timepoint using Haplotype  
497 Reconstruction for Longitudinal Samples (HaROLD) <sup>67</sup>. Briefly, SNPs were assigned to each haplotype  
498 such that the frequency of variants was equal to the sum of the frequencies of haplotypes  
499 containing a specific variant. Maximal log likelihood was used to optimise time-dependent  
500 frequencies for longitudinal haplotypes which was calculated by summing over all possible  
501 assignment of haplotype variants. Haplotypes were then constructed based on posterior  
502 probabilities. After constructing haplotypes, a refinement process remapped reads from BAM files to  
503 those constructed haplotypes. The number of haplotypes either increased or decreased as a result  
504 of combination or division according to AIC scores, in order to present the most accurate  
505 representation of viral populations at each timepoint.

506

507 Whole-genome nucleotide diversity was calculated from BAM files using an in-house script  
508 (<https://github.com/ucl-pathgenomics/NucleotideDiversity>). Briefly diversity is calculated by fitting  
509 all observed variant frequencies to either a beta distribution or four-dimensional Dirichlet  
510 distribution plus delta function (representing invariant sites). These parameters were optimised by  
511 maximum log likelihood.

512

513 Maximum-likelihood phylogenetic trees and ancestral reconstruction were performed using IQTree2  
514 v2.1.3<sup>68</sup> and a GTR+F+I model with 1000 ultrafast bootstrap replicates<sup>69</sup>. All trees were visualised



515 with Figtree v.1.4.4 (<http://tree.bio.ed.ac.uk/software/figtree/>), rooted on the AF411967.3  
516 reference sequence, and nodes arranged in descending order. Phylogenies were manipulated and  
517 annotated using ggtree v2.2.4.

518

### 519 **Multi Dimension Scaling (MDS) Plots**

520 Pairwise distances between these consensus sequences were calculated using the `dist.dna()`  
521 package, with a TN93 nucleotide-nucleotide substitution matrix and with pairwise deletion  
522 implemented in the R package Ape v.5.4. Non-metric Multi-dimensional scaling (MDS) was  
523 implemented using the `metaMDS()` function in the R package, `vegan` v2.5.7. MDS is a method to  
524 attempt to simplify high dimensional data into a simpler representation of reducing dimensionality  
525 whilst retaining most of the variation relationships between points. We find that like network trees,  
526 non-metric MDS better represents the true relative distances between sequences, whereas  
527 eigenvector methods are less reliable in this sense. In a genomics context we can apply  
528 dimensionality reduction on pairwise distance matrices, where each dimension is a sequence with  
529 data points of  $n-1$  sequences pairwise distance. The process was repeated with whole genome  
530 haplotype sequences.

531

### 532 **Linkage Disequilibrium & Recombination**

533 Starting with a sequence alignment we determined the pairwise LD  $R^2$  associations for all variable  
534 sites using `WeightedLD`<sup>70</sup>. This method allowed us to exclude sites with any insertions or ambiguous  
535 characters easily where we used the option `--min-acgt 0.99` and `--min-variability 0.05`. The pairwise  
536  $R^2$  values were then binned per 200bp comparison distance blocks along the genome and the mean  
537  $R^2$  value were taken and represented graphically to assess LD decay. This analysis was run for the  
538 three participants taken forward for in-detail analysis, and run using an alignment of all their  
539 timepoint samples. Graphics were generated using `Rv4.04`.

540

541 We first performed an analysis for detecting individual recombination events in individual genome  
542 sequences using `RDP`, `GENECONV`, `BOOTSCAN`, `MAXCHI`, `CHIMAERA`, `SISCAN`, and `3SEQ` methods  
543 implemented in `RDP5`<sup>71</sup> using default settings. Putative breakpoint hotspots were identified and  
544 manually checked and adjusted if necessary using the `BURT` method with the `MAXCHI` matrix and  
545 `LARD` two breakpoint scan methods. Final recombination hotspots were confirmed if at least three  
546 or more methods supported the breakpoint.

547

### 548 **Funding**

549 SAK is supported by the Bill and Melinda Gates Foundation: OPP1175094. RKG is supported by  
550 Wellcome Trust Senior Fellowship in Clinical Science: WT108082AIA. OC is supported by a PhD  
551 studentship/UKRI MRC grant : MR/N013867/1.

552

### 553 **Competing Interests**

554 RKG has received ad hoc consulting fees from Gilead, ViiV and UMOVIS Lab.

555

### 556 **Author Contributions**

557 Conceptualization of study: S.A.K, R.K.G, A.D, Bioinformatic processes: A.D, S.A.K, O.C, D.P.M,

558 Writing and revising manuscript: S.A.K, O.C, A.D, D.P.M, D.P, R.A.G, R.K.G

559

### 560 **Data Availability Statement**

561 All fasta files have been deposited on Genbank with the following accession numbers [pending  
562 approval].

563

### 564 **Code Availability Statement**

565 Custom code used to produce figures and graphs can be found at: [https://github.com/Steven-](https://github.com/Steven-Kemp/21-2_hiv_tasp/tree/main/scripts)

566 [Kemp/21-2\\_hiv\\_tasp/tree/main/scripts](https://github.com/Steven-Kemp/21-2_hiv_tasp/tree/main/scripts) or within the references manuscripts.

### 567 **References**

568 1 Abrahams, M. R. *et al.* Quantitating the multiplicity of infection with human  
569 immunodeficiency virus type 1 subtype C reveals a non-poisson distribution of transmitted  
570 variants. *J Virol* **83**, 3556-3567, doi:10.1128/JVI.02132-08 (2009).

571 2 Zanini, F., Puller, V., Brodin, J., Albert, J. & Neher, R. A. In vivo mutation rates and the  
572 landscape of fitness costs of HIV-1. *Virus Evol* **3**, vex003, doi:10.1093/ve/vex003 (2017).

573 3 Salemi, M. The intra-host evolutionary and population dynamics of human  
574 immunodeficiency virus type 1: a phylogenetic perspective. *Infect Dis Rep* **5**, e3,  
575 doi:10.4081/idr.2013.s1.e3 (2013).

576 4 Lemey, P., Rambaut, A. & Pybus, O. G. HIV evolutionary dynamics within and among hosts.  
577 *Aids Reviews* **8**, 125-140 (2006).

578 5 Collier, D. A., Monit, C. & Gupta, R. K. The Impact of HIV-1 Drug Escape on the Global  
579 Treatment Landscape. *Cell host & microbe* **26**, 48-60, doi:10.1016/j.chom.2019.06.010  
580 (2019).

- 581 6 Biebricher, C. K. & Eigen, M. What is a quasispecies? *Curr Top Microbiol Immunol* **299**, 1-31,  
582 doi:10.1007/3-540-26397-7\_1 (2006).
- 583 7 Zanini, F. *et al.* Population genomics of inpatient HIV-1 evolution. *Elife* **4**, e11282,  
584 doi:10.7554/eLife.11282 (2015).
- 585 8 Lythgoe, K. A. & Fraser, C. New insights into the evolutionary rate of HIV-1 at the within-host  
586 and epidemiological levels. *Proceedings of the Royal Society B-Biological Sciences* **279**, 3367-  
587 3375, doi:10.1098/rspb.2012.0595 (2012).
- 588 9 Hedskog, C. *et al.* Dynamics of HIV-1 Quasispecies during Antiviral Treatment Dissected  
589 Using Ultra-Deep Pyrosequencing. *PLoS one* **5**, e11345, doi:ARTN e11345  
590 10.1371/journal.pone.0011345 (2010).
- 591 10 Shankarappa, R. *et al.* Consistent viral evolutionary changes associated with the progression  
592 of human immunodeficiency virus type 1 infection. *J Virol* **73**, 10489-10502,  
593 doi:10.1128/JVI.73.12.10489-10502.1999 (1999).
- 594 11 Masikini, P. & Mpondo, B. C. HIV drug resistance mutations following poor adherence in HIV-  
595 infected patient: a case report. *Clin Case Rep* **3**, 353-356, doi:10.1002/ccr3.254 (2015).
- 596 12 TenoRes Study, G. Global epidemiology of drug resistance after failure of WHO  
597 recommended first-line regimens for adult HIV-1 infection: a multicentre retrospective  
598 cohort study. *Lancet Infect Dis* **16**, 565-575, doi:10.1016/S1473-3099(15)00536-8 (2016).
- 599 13 Collier, D. *et al.* Virological Outcomes of Second-line Protease Inhibitor-Based Treatment for  
600 Human Immunodeficiency Virus Type 1 in a High-Prevalence Rural South African Setting: A  
601 Competing-Risks Prospective Cohort Analysis. *Clinical infectious diseases : an official  
602 publication of the Infectious Diseases Society of America* **64**, 1006-1016,  
603 doi:10.1093/cid/cix015 (2017).
- 604 14 Giandhari, J. *et al.* Genetic Changes in HIV-1 Gag-Protease Associated with Protease  
605 Inhibitor-Based Therapy Failure in Pediatric Patients. *AIDS Res Hum Retroviruses* **31**, 776-  
606 782, doi:10.1089/AID.2014.0349 (2015).
- 607 15 Kelly Pillay, S., Singh, U., Singh, A., Gordon, M. & Ndungu, T. Gag drug resistance mutations  
608 in HIV-1 subtype C patients, failing a protease inhibitor inclusive treatment regimen, with  
609 detectable lopinavir levels. *Journal of the International AIDS Society* **17**, 19784 (2014).

- 610 16 Sutherland, K. A. *et al.* Evidence for Reduced Drug Susceptibility without Emergence of  
611 Major Protease Mutations following Protease Inhibitor Monotherapy Failure in the SARA  
612 Trial. *PLoS one* **10**, e0137834, doi:10.1371/journal.pone.0137834 (2015).
- 613 17 Sutherland, K. A. *et al.* Phenotypic characterization of virological failure following  
614 lopinavir/ritonavir monotherapy using full-length Gag-protease genes. *The Journal of*  
615 *antimicrobial chemotherapy* **69**, 3340-3348, doi:10.1093/jac/dku296 (2014).
- 616 18 Sutherland, K. A. *et al.* Gag-Protease Sequence Evolution Following Protease Inhibitor  
617 Monotherapy Treatment Failure in HIV-1 Viruses Circulating in East Africa. *AIDS research and*  
618 *human retroviruses* **31**, 1032-1037, doi:10.1089/aid.2015.0138 (2015).
- 619 19 Day, C. L. *et al.* Proliferative capacity of epitope-specific CD8 T-cell responses is inversely  
620 related to viral load in chronic human immunodeficiency virus type 1 infection. *Journal of*  
621 *virology* **81**, 434-438, doi:10.1128/JVI.01754-06 (2007).
- 622 20 Blanch-Lombarte, O. *et al.* HIV-1 Gag mutations alone are sufficient to reduce darunavir  
623 susceptibility during virological failure to boosted PI therapy. *The Journal of antimicrobial*  
624 *chemotherapy* **75**, 2535-2546, doi:10.1093/jac/dkaa228 (2020).
- 625 21 Feder, A. F. *et al.* More effective drugs lead to harder selective sweeps in the evolution of  
626 drug resistance in HIV-1. *Elife* **5**, e10670, doi:10.7554/eLife.10670 (2016).
- 627 22 Harris, R. B., Sackman, A. & Jensen, J. D. On the unfounded enthusiasm for soft selective  
628 sweeps II: Examining recent evidence from humans, flies, and viruses. *PLoS genetics* **14**,  
629 e1007859, doi:10.1371/journal.pgen.1007859 (2018).
- 630 23 Dam, E. *et al.* Gag mutations strongly contribute to HIV-1 resistance to protease inhibitors in  
631 highly drug-experienced patients besides compensating for fitness loss. *PLoS pathogens* **5**,  
632 e1000345 (2009).
- 633 24 Cong, M. E., Heneine, W. & Garcia-Lerma, J. G. The fitness cost of mutations associated with  
634 human immunodeficiency virus type 1 drug resistance is modulated by mutational  
635 interactions. *Journal of Virology* **81**, 3037-3041, doi:10.1128/Jvi.02712-06 (2007).
- 636 25 Wilke, C. O. Quasispecies theory in the context of population genetics. *BMC Evol Biol* **5**, 44,  
637 doi:10.1186/1471-2148-5-44 (2005).

- 638 26 Lauring, A. S. & Andino, R. Quasispecies theory and the behavior of RNA viruses. *PLoS*  
639 *Pathog* **6**, e1001005, doi:10.1371/journal.ppat.1001005 (2010).
- 640 27 Iwuji, C. C. *et al.* Evaluation of the impact of immediate versus WHO recommendations-  
641 guided antiretroviral therapy initiation on HIV incidence: the ANRS 12249 TasP (Treatment  
642 as Prevention) trial in Hlabisa sub-district, KwaZulu-Natal, South Africa: study protocol for a  
643 cluster randomised controlled trial. *Trials* **14**, 230, doi:10.1186/1745-6215-14-230 (2013).
- 644 28 World Health Organization. *Consolidated guidelines on the use of antiretroviral drugs for*  
645 *treating and preventing HIV infection: recommendations for a public health approach.*  
646 (World Health Organization, 2016).
- 647 29 Pang, J. *et al.* Haplotype assignment of longitudinal viral deep-sequencing data using co-  
648 variation of variant frequencies. *bioRxiv*, 444877, doi:10.1101/444877 (2020).
- 649 30 Cox, M. A. & Cox, T. F. in *Handbook of data visualization* 315-347 (Springer, 2008).
- 650 31 Stephens, M. & Scheet, P. Accounting for Decay of Linkage Disequilibrium in Haplotype  
651 Inference and Missing-Data Imputation. *The American Journal of Human Genetics* **76**, 449-  
652 462, doi:<https://doi.org/10.1086/428594> (2005).
- 653 32 Song, H. *et al.* Tracking HIV-1 recombination to resolve its contribution to HIV-1 evolution in  
654 natural infection. *Nature Communications* **9**, 1928, doi:10.1038/s41467-018-04217-5 (2018).
- 655 33 Datir, R. *et al.* In Vivo Emergence of a Novel Protease Inhibitor Resistance Signature in HIV-1  
656 Matrix. *mBio* **11**, e02036-02020, doi:10.1128/mBio.02036-20 (2020).
- 657 34 Kletenkov, K. *et al.* Role of Gag mutations in PI resistance in the Swiss HIV cohort study:  
658 bystanders or contributors? *J Antimicrob Chemother* **72**, 866-875, doi:10.1093/jac/dkw493  
659 (2017).
- 660 35 Rabi, S. A. *et al.* Multi-step inhibition explains HIV-1 protease inhibitor pharmacodynamics  
661 and resistance. *The Journal of clinical investigation* **123**, 3848-3860, doi:10.1172/JCI67399  
662 (2013).
- 663 36 Manasa, J. *et al.* Evolution of gag and gp41 in Patients Receiving Ritonavir-Boosted Protease  
664 Inhibitors. *Sci Rep* **7**, 11559, doi:10.1038/s41598-017-11893-8 (2017).

- 665 37 Datir, R., El Bouzidi, K., Dakum, P., Ndembi, N. & Gupta, R. K. Baseline PI susceptibility by  
666 HIV-1 Gag-protease phenotyping and subsequent virological suppression with PI-based  
667 second-line ART in Nigeria. *The Journal of antimicrobial chemotherapy* **74**, 1402-1407,  
668 doi:10.1093/jac/dkz005 (2019).
- 669 38 Parikh, U. M., Zelina, S., Sluis-Cremer, N. & Mellors, J. W. Molecular mechanisms of  
670 bidirectional antagonism between K65R and thymidine analog mutations in HIV-1 reverse  
671 transcriptase. *Aids* **21**, 1405-1414 (2007).
- 672 39 Parikh, U. M., Bachelier, L., Koontz, D. & Mellors, J. W. The K65R mutation in human  
673 immunodeficiency virus type 1 reverse transcriptase exhibits bidirectional phenotypic  
674 antagonism with thymidine analog mutations. *Journal of virology* **80**, 4971-4977 (2006).
- 675 40 Parikh, U. M., Barnas, D. C., Faruki, H. & Mellors, J. W. Antagonism between the HIV-1  
676 reverse-transcriptase mutation K65R and thymidine-analogue mutations at the genomic  
677 level. *The Journal of infectious diseases* **194**, 651-660 (2006).
- 678 41 Department of Health. 2019 ART Clinical Guidelines for the Management of HIV in Adults,  
679 Pregnancy, Adolescents, Children, Infants and Neonates. (Republic of South Africa National  
680 Department of Health, 2019).
- 681 42 UNAIDS. *Global HIV & AIDS statistics — 2020 fact sheet*,  
682 <<https://www.unaids.org/en/resources/fact-sheet>> (2020), Accessed 3rd March 2021.
- 683 43 Gupta, R. K. *et al.* HIV-1 drug resistance before initiation or re-initiation of first-line  
684 antiretroviral therapy in low-income and middle-income countries: a systematic review and  
685 meta-regression analysis. *Lancet Infect Dis* **18**, 346-355, doi:10.1016/S1473-3099(17)30702-  
686 8 (2018).
- 687 44 Gupta, R. K. *et al.* Global trends in antiretroviral resistance in treatment-naive individuals  
688 with HIV after rollout of antiretroviral treatment in resource-limited settings: a global  
689 collaborative study and meta-regression analysis. *Lancet* **380**, 1250-1258,  
690 doi:10.1016/S0140-6736(12)61038-1 (2012).
- 691 45 Gregson, J. *et al.* Occult HIV-1 drug resistance to thymidine analogues following failure of  
692 first-line tenofovir combined with a cytosine analogue and nevirapine or efavirenz in sub  
693 Saharan Africa: a retrospective multi-centre cohort study. *Lancet Infect Dis*,  
694 doi:10.1016/S1473-3099(16)30469-8 (2017).

- 695 46 WHO, C. Global Fund. HIV drug resistance report. 2017. *World Health Organisation* (2017).
- 696 47 Stefic, K., Bouvin-Pley, M., Braibant, M. & Barin, F. Impact of HIV-1 Diversity on Its Sensitivity  
697 to Neutralization. *Vaccines (Basel)* **7**, 74, doi:10.3390/vaccines7030074 (2019).
- 698 48 Pancera, M. *et al.* Structure and immune recognition of trimeric pre-fusion HIV-1 Env.  
699 *Nature* **514**, 455-461, doi:10.1038/nature13808 (2014).
- 700 49 Yu, F. *et al.* The Transmission and Evolution of HIV-1 Quasispecies within One Couple: a  
701 Follow-up Study based on Next-Generation Sequencing. *Scientific reports* **8**, 1404,  
702 doi:10.1038/s41598-018-19783-3 (2018).
- 703 50 Pang, J. *et al.* Mixed cytomegalovirus genotypes in HIV-positive mothers show  
704 compartmentalization and distinct patterns of transmission to infants. *Elife* **9**, e63199,  
705 doi:10.7554/eLife.63199 (2020).
- 706 51 Boshier, F. A. T. *et al.* Remdesivir induced viral RNA and subgenomic RNA suppression, and  
707 evolution of viral variants in SARS-CoV-2 infected patients. *medRxiv*,  
708 2020.2011.2018.20230599, doi:10.1101/2020.11.18.20230599 (2020).
- 709 52 Parry, C. M. *et al.* Three residues in HIV-1 matrix contribute to protease inhibitor  
710 susceptibility and replication capacity. *Antimicrobial agents and chemotherapy* **55**, 1106-  
711 1113, doi:10.1128/AAC.01228-10 (2011).
- 712 53 Neher, R. A. & Leitner, T. Recombination rate and selection strength in HIV intra-patient  
713 evolution. *PLoS Comput Biol* **6**, e1000660, doi:10.1371/journal.pcbi.1000660 (2010).
- 714 54 El Bouzidi, K. *et al.* High prevalence of integrase mutation L74I in West African HIV-1  
715 subtypes prior to integrase inhibitor treatment. *J Antimicrob Chemother* **75**, 1575-1579,  
716 doi:10.1093/jac/dkaa033 (2020).
- 717 55 Derache, A. *et al.* Predicted antiviral activity of tenofovir versus abacavir in combination with  
718 a cytosine analogue and the integrase inhibitor dolutegravir in HIV-1-infected South African  
719 patients initiating or failing first-line ART. *The Journal of antimicrobial chemotherapy*,  
720 doi:10.1093/jac/dky428 (2018).
- 721 56 Siedner, M. J. *et al.* Reduced efficacy of HIV-1 integrase inhibitors in patients with drug  
722 resistance mutations in reverse transcriptase. *Nat Commun* **11**, 5922, doi:10.1038/s41467-  
723 020-19801-x (2020).

- 724 57 Iwuji, C. *et al.* Universal test and treat is not associated with sub-optimal antiretroviral  
725 therapy adherence in rural South Africa: the ANRS 12249 TasP trial. *J Int AIDS Soc* **21**,  
726 e25112, doi:10.1002/jia2.25112 (2018).
- 727 58 Derache, A. *et al.* Impact of Next-generation Sequencing Defined Human Immunodeficiency  
728 Virus Pretreatment Drug Resistance on Virological Outcomes in the ANRS 12249 Treatment-  
729 as-Prevention Trial. *Clinical infectious diseases : an official publication of the Infectious*  
730 *Diseases Society of America* **69**, 207-214, doi:10.1093/cid/ciy881 (2019).
- 731 59 Gall, A. *et al.* Universal amplification, next-generation sequencing, and assembly of HIV-1  
732 genomes. *Journal of clinical microbiology* **50**, 3838-3844, doi:10.1128/JCM.01516-12 (2012).
- 733 60 Martin, M. J. E. j. Cutadapt removes adapter sequences from high-throughput sequencing  
734 reads. **17**, pp. 10-12 (2011).
- 735 61 Li, H. Aligning sequence reads, clone sequences and assembly contigs with BWA-MEM. *arXiv*  
736 *preprint arXiv:1303.3997* (2013).
- 737 62 Shafer, R. W. Rationale and uses of a public HIV drug-resistance database. *The Journal of*  
738 *infectious diseases* **194 Suppl 1**, S51-58, doi:10.1086/505356 (2006).
- 739 63 Okonechnikov, K., Conesa, A. & Garcia-Alcalde, F. Qualimap 2: advanced multi-sample  
740 quality control for high-throughput sequencing data. *Bioinformatics (Oxford, England)* **32**,  
741 292-294, doi:10.1093/bioinformatics/btv566 (2016).
- 742 64 Koboldt, D. C. *et al.* VarScan 2: somatic mutation and copy number alteration discovery in  
743 cancer by exome sequencing. *Genome Res* **22**, 568-576, doi:10.1101/gr.129684.111 (2012).
- 744 65 Charles, O. J., Venturini, C. & Breuer, J. cmvdr - An R package for Human Cytomegalovirus  
745 antiviral Drug Resistance Genotyping. *bioRxiv*, 2020.2005.2015.097907,  
746 doi:10.1101/2020.05.15.097907 (2020).
- 747 66 Perrier, M. *et al.* Evaluation of different analysis pipelines for the detection of HIV-1 minority  
748 resistant variants. *PloS one* **13**, e0198334, doi:10.1371/journal.pone.0198334 (2018).
- 749 67 Goldstein, R. A., Tamuri, A. U., Roy, S. & Breuer, J. Haplotype assignment of virus NGS data  
750 using co-variation of variant frequencies. *bioRxiv*, 444877 (2018).



751 68 Minh, B. Q. *et al.* IQ-TREE 2: New models and efficient methods for phylogenetic inference in  
752 the genomic era. *bioRxiv*, 849372, doi:10.1101/849372 (2019).

753 69 Minh, B. Q., Nguyen, M. A. & von Haeseler, A. Ultrafast approximation for phylogenetic  
754 bootstrap. *Mol Biol Evol* **30**, 1188-1195, doi:10.1093/molbev/mst024 (2013).

755 70 Charles, O. J., Roberts, J., Breuer, J. & Goldstein, R. A. WeightedLD: The Application of  
756 Sequence Weights to Linkage Disequilibrium. *bioRxiv*, 2021.2006.2004.447093,  
757 doi:10.1101/2021.06.04.447093 (2021).

758 71 Martin, D. P. *et al.* RDP5: a computer program for analyzing recombination in, and removing  
759 signals of recombination from, nucleotide sequence datasets. *Virus Evol* **7**, veaa087,  
760 doi:10.1093/ve/veaa087 (2021).

761

762

763

764

765

766

767

768

769

770

771

772

773

774 **Table 1.** Regimens and viral load at final timepoint for all participants. Participants initiated and  
775 maintained 1<sup>st</sup>-line regimens for between 1-10 years before being switched to 2<sup>nd</sup>-line regimens as  
776 part of the TasP trial. Eight of the nine participants were failing 2<sup>nd</sup>-line regimens at the final  
777 timepoint.

778

| Participant | No. of timepoints | 1st-line regimen | Time since initiation of 1 <sup>st</sup> -line treatment (yrs.) | 2 <sup>nd</sup> -line regimen | Viral Load at final timepoint (copies/ml) |
|-------------|-------------------|------------------|-----------------------------------------------------------------|-------------------------------|-------------------------------------------|
| 15664       | 6                 | d4T, 3TC, FTC    | 6.2                                                             | LPV/r, TDF, FTC               | 28655                                     |
| 16207       | 5                 | d4T, 3TC,        | 5.9                                                             | LPV/r, TDF, FTC               | 56660                                     |

|       |                                                                                                                  | NVP              |      |                        |        |
|-------|------------------------------------------------------------------------------------------------------------------|------------------|------|------------------------|--------|
| 22763 | 8                                                                                                                | d4T, 3TC,<br>EFV | 6.2  | LPV/r, TDF, 3TC        | 15017  |
| 22828 | 6                                                                                                                | d4T, 3TC,<br>NVP | 6.4  | LPV/r, TDF,<br>3TC/FTC | 947    |
| 26892 | 7                                                                                                                | d4T, 3TC,<br>EFV | 6    | LPV/r, TDF, FTC        | 12221  |
| 28545 | 5                                                                                                                | TDF, FTC,<br>EFV | 1.3  | LPV/r, AZT, 3TC        | 12964  |
| 28841 | 2                                                                                                                | -                | -    | -                      | 199011 |
| 29447 | 4                                                                                                                | TDF, FTC,<br>EFV | 2.8  | LPV/r, TDF, FTC        | 64362  |
| 47939 | 3                                                                                                                | d4T, 3TC,<br>EFV | 10.1 | LPV/r, AZT,<br>3TC/FTC | 6328   |
| 779   | <b>NRTI:</b> Stavudine, d4T; Lamivudine, 3TC; Tenofovir, TDF; Emtricitabine, FTC; Zidovudine, AZT. <b>NNRTI:</b> |                  |      |                        |        |
| 780   | Efavirenz, EFV; Nevirapine, NVP. <b>PI:</b> Lopinavir/ritonavir, LPV/r. “-”, data missing.                       |                  |      |                        |        |
| 781   |                                                                                                                  |                  |      |                        |        |
| 782   |                                                                                                                  |                  |      |                        |        |

a)

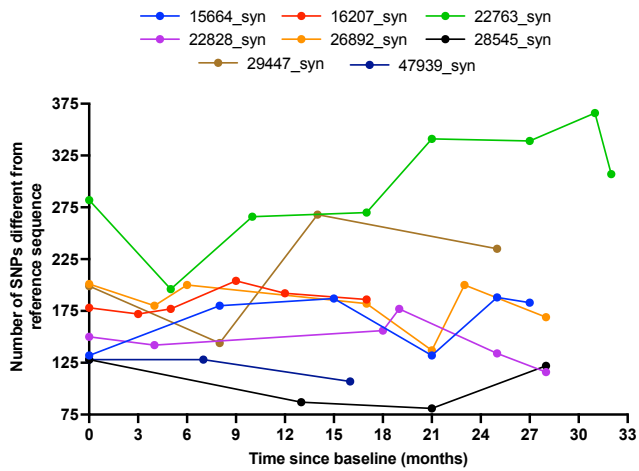

b)

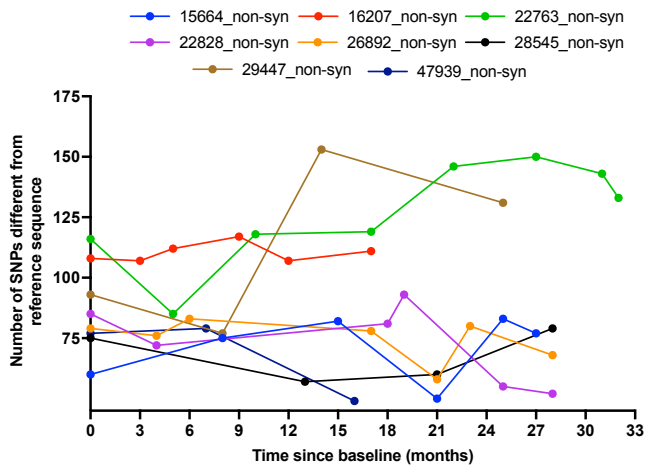

c)

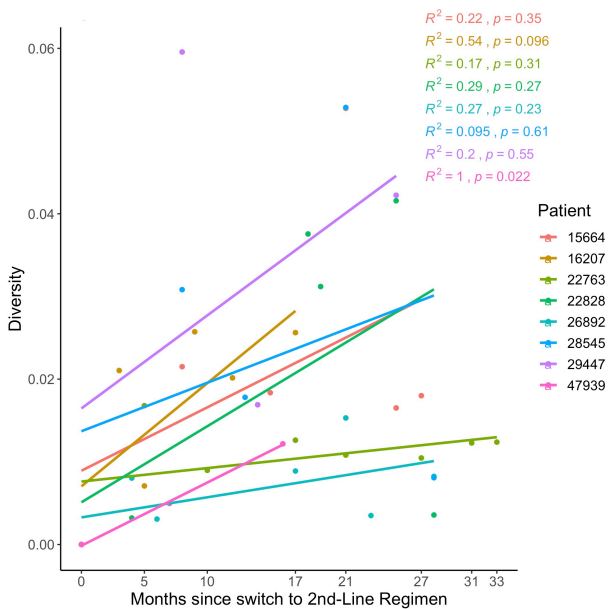

d)

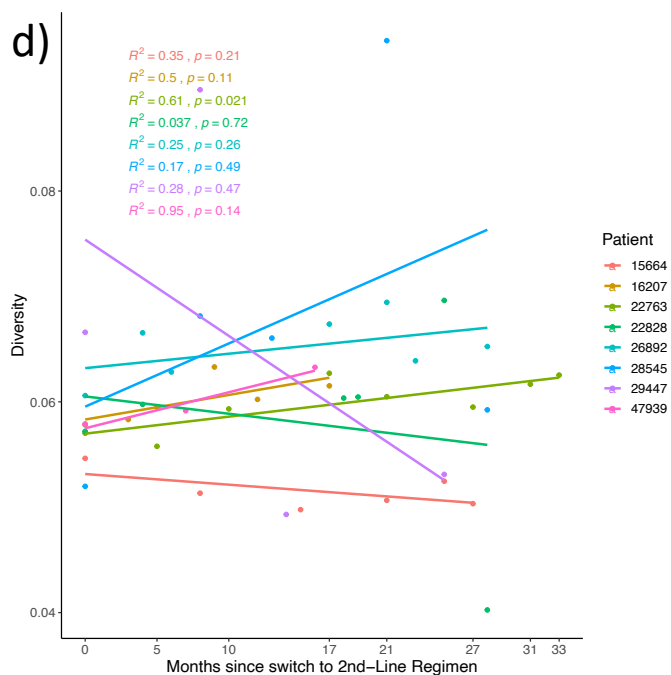

e)

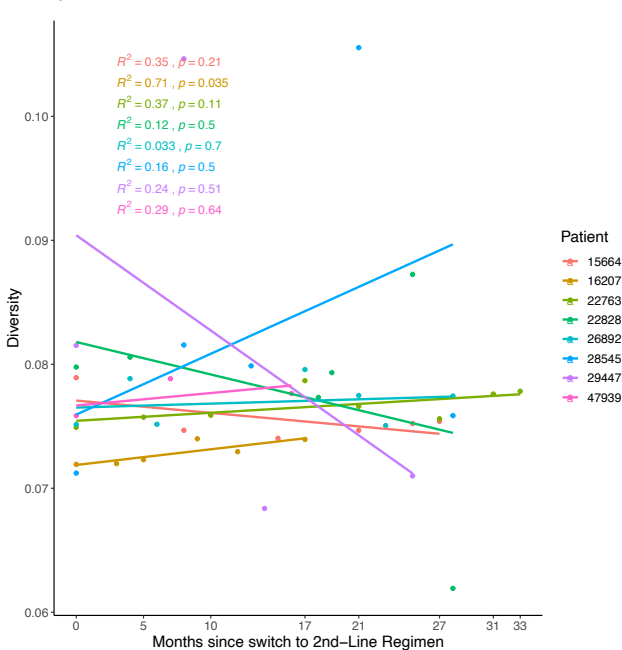

**Figure 1. Measure of sequence divergence for eight participants under non-suppressive ART, relative to the subtype C reference strain at successive timepoints.** These data were for SNPs detected by Illumina NGS at <2% abundance. Sites had coverage of at least 10 reads. In both a) synonymous and b) non-synonymous mutations, there was idiosyncratic change in number of SNPs relative to the reference strain over time. **1c-e) Linear regression of average pairwise distance relative to C) The baseline timepoint, D) a reconstructed subtype C consensus and E) a reconstructed subtype M consensus.** Average pairwise distances were estimated under a TN93 substitution model and reveal divergence from the initial samples. The Ancestral/Consensus HIV-1 subtype C and M was downloaded from the Los Alamos National Laboratory (<https://www.hiv.lanl.gov/content/sequence/NEWALIGN/align.html>). All ancestral HIV-1 subtype were downloaded from the same alignment and a consensus was created, as a proxy for an ancestral HIV-1 group M sequence.  $R^2$  and  $p$ -values for logistic regression fits are indicated.

a)

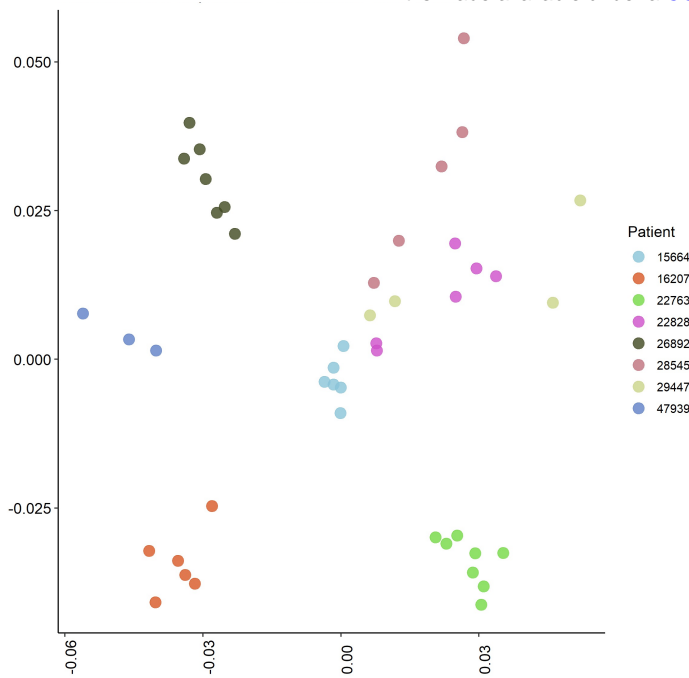

b)

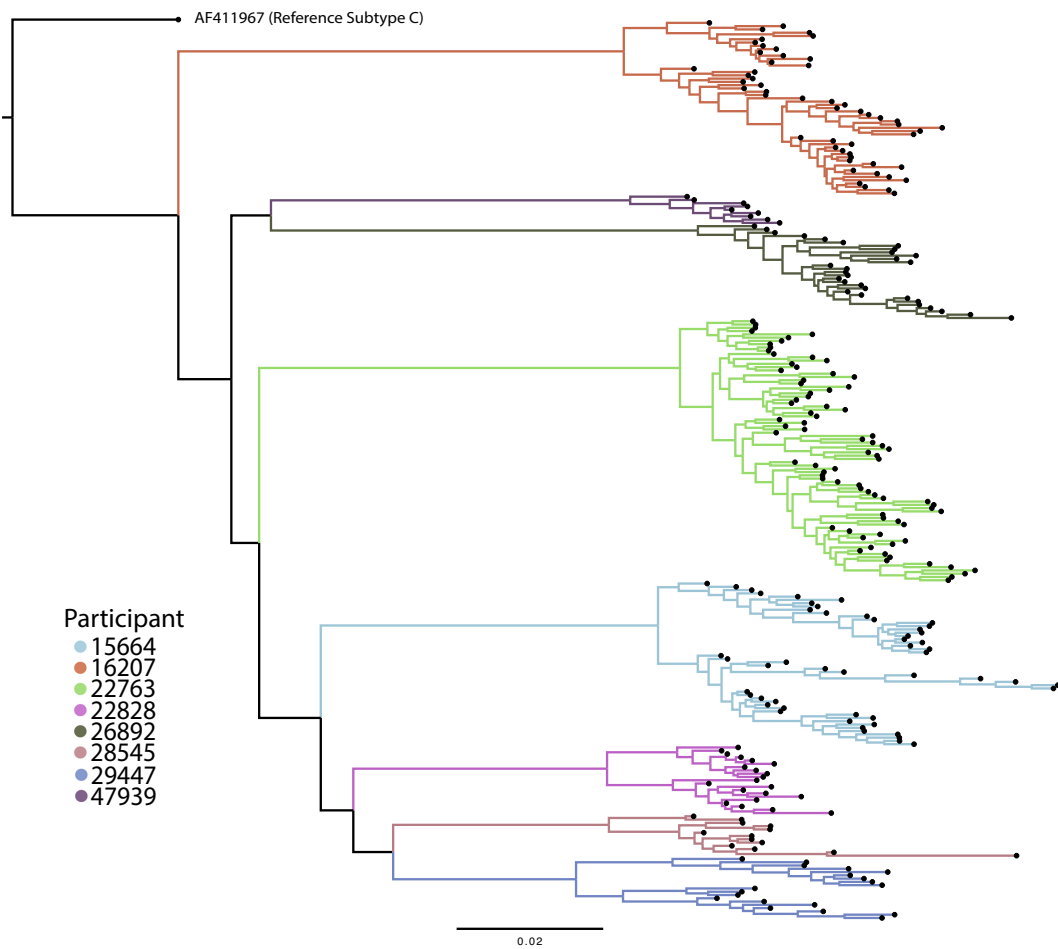

**Figure 2. Multi-dimensional scaling showing A) clustering of HIV whole genomes from consensus sequences with high intra-participant diversity.** Multi-dimensional scaling (MDS) were created by determining all pairwise distance comparisons under a TN93 substitution model, coloured by participant. Axis are MDS-1 and MDS-2. **B) Maximum likelihood phylogeny of constructed viral haplotypes for all participants.** The phylogeny was rooted on the AF411967 clade C reference genome. Reconstructed haplotypes were genetically diverse and did not typically cluster by timepoint.

A)

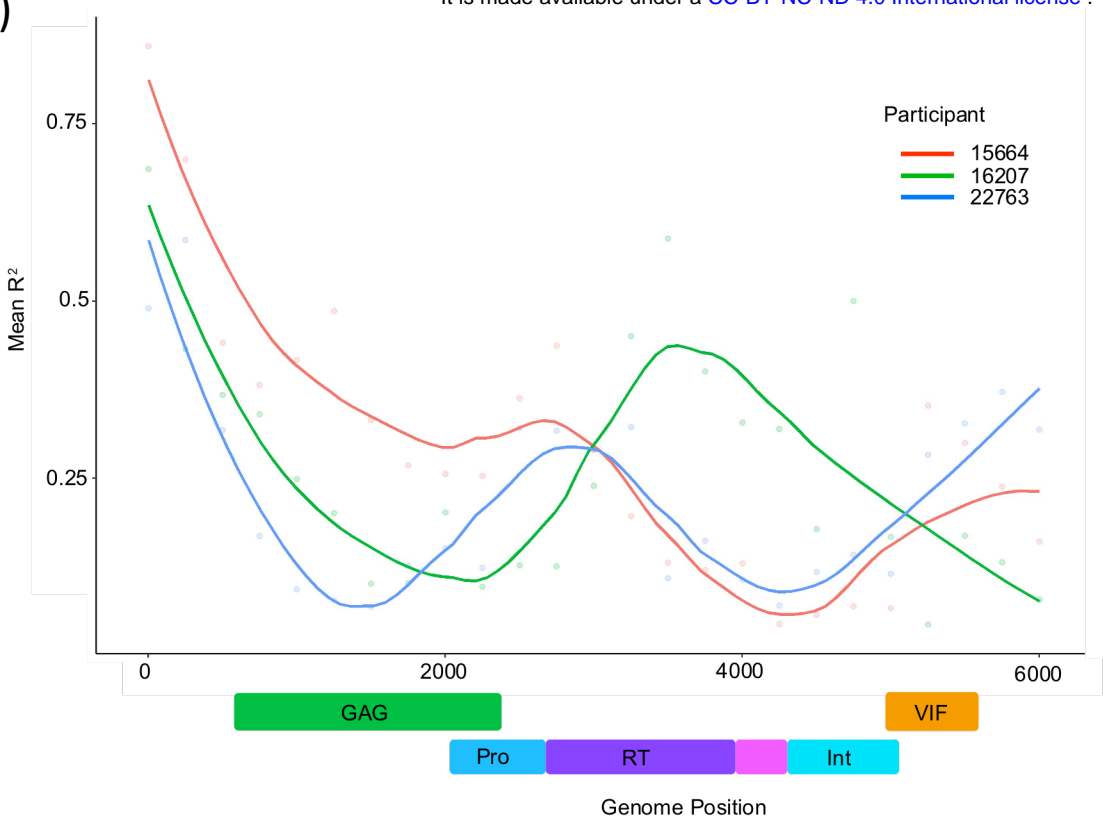

B)

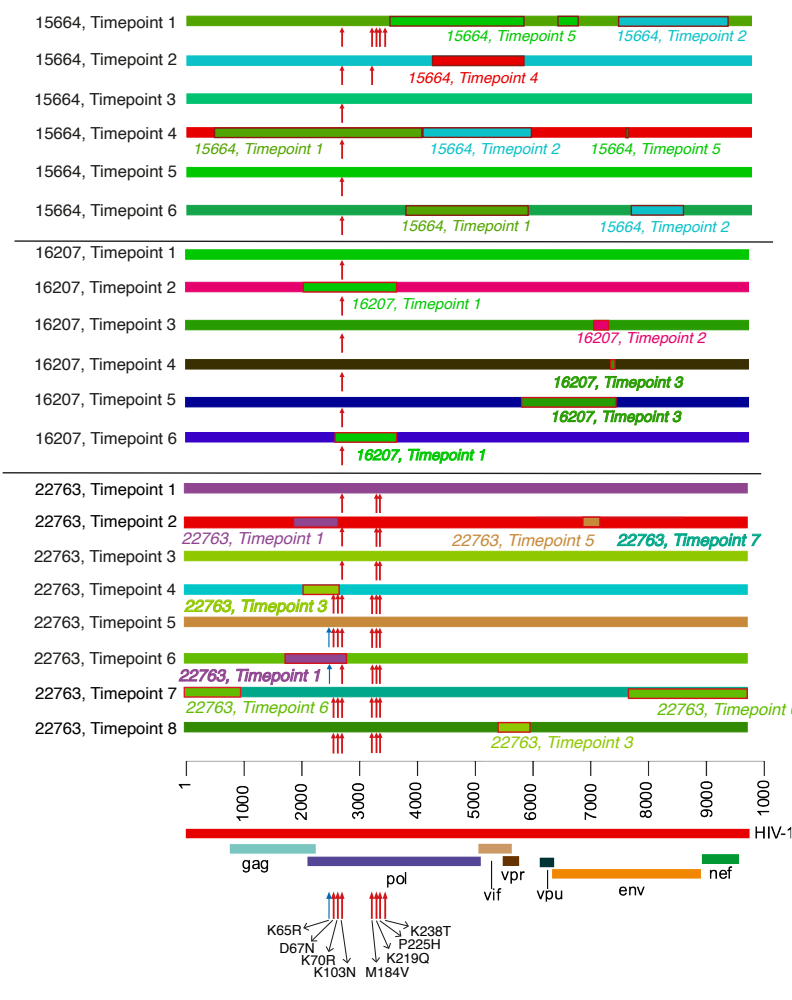

**Figure 3A) Pairwise linkage disequilibrium decays rapidly with increasing distance between SNPs.** The line indicates the average LD of all eight patients. There was a constant decrease in linkage disequilibrium over the first 800bp. **B) Perceived recombination breakpoints and drug-resistance associated mutations of all longitudinal consensus sequences belonging to three participants: 15664, 16207 and 22763.** All sequences were coloured uniquely uniquely; perceived recombination events supported by 4 or more methods implemented in RDP5 are highlighted with a red border and italic text to show the major parent and recombinant portion of the sequence. Drug-resistance associated mutations are indicated with a red arrow, relative to the key at the bottom of the image. For ease of distinguishment, the K65R mutations is indicated with a blue arrow.

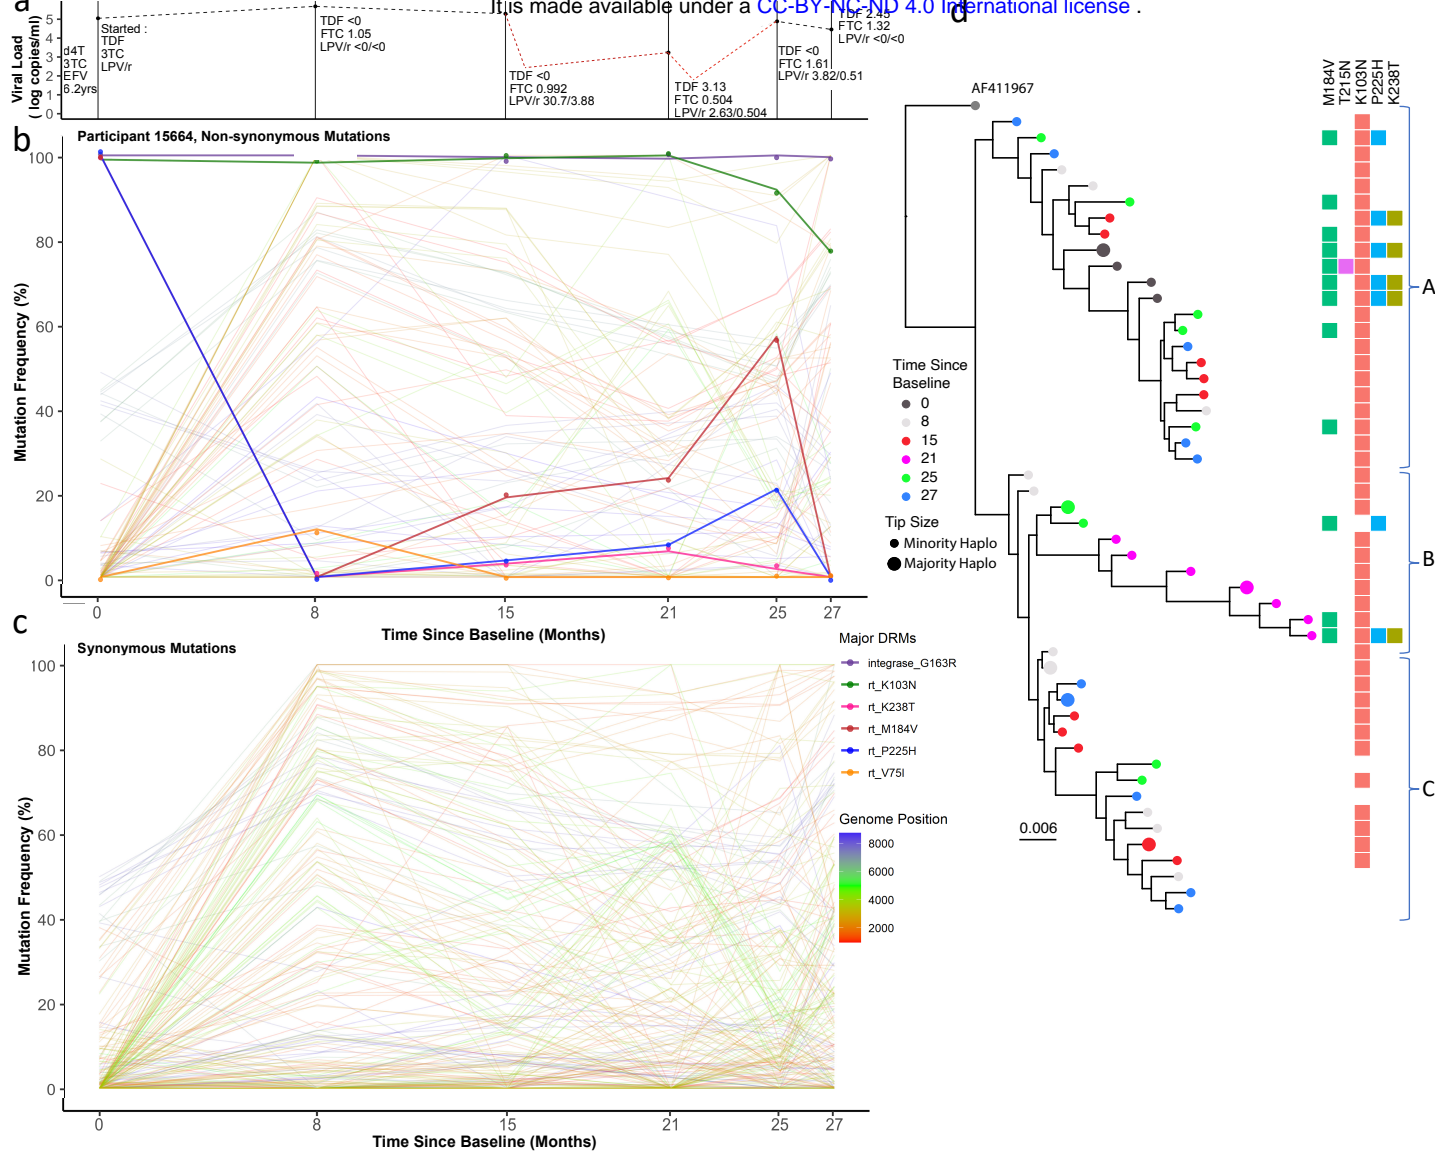

**Figure 4. Drug regimen, adherence and viral dynamics within participant 15664. a) Viral load and drug levels.** At successive timepoints drug regimen was noted and plasma drug concentration measured by HPLC (nmol/l). The participant was characterised by multiple partial suppression (<750 copies/ml, 16 months; <250 copies/ml, 22 months) and rebound events (red dotted line) and poor adherence to the drug regimen. **b) Drug resistance and non-drug resistance associated non-synonymous mutation frequencies by Illumina NGS.** The participant had large population shifts between timepoints 1-2, consistent with a hard selective sweep, coincident with the shift from 1<sup>st</sup>-line regimen to 2<sup>nd</sup>-line. **c) Synonymous mutation frequencies.** All mutations with a frequency of <10% or >90% at two or more timepoints were tracked over successive timepoints. Most changes were restricted to *gag* and *pol* regions and had limited shifts in frequency i.e. between 20-60%. **d) Maximum-likelihood phylogeny of reconstructed haplotypes.** Haplotypes largely segregated into three major clades (labelled A-C). Majority and minority haplotypes, some carrying lamivudine resistance mutation M184V. Clades referred to in the text body are shown to the right of the heatmap.

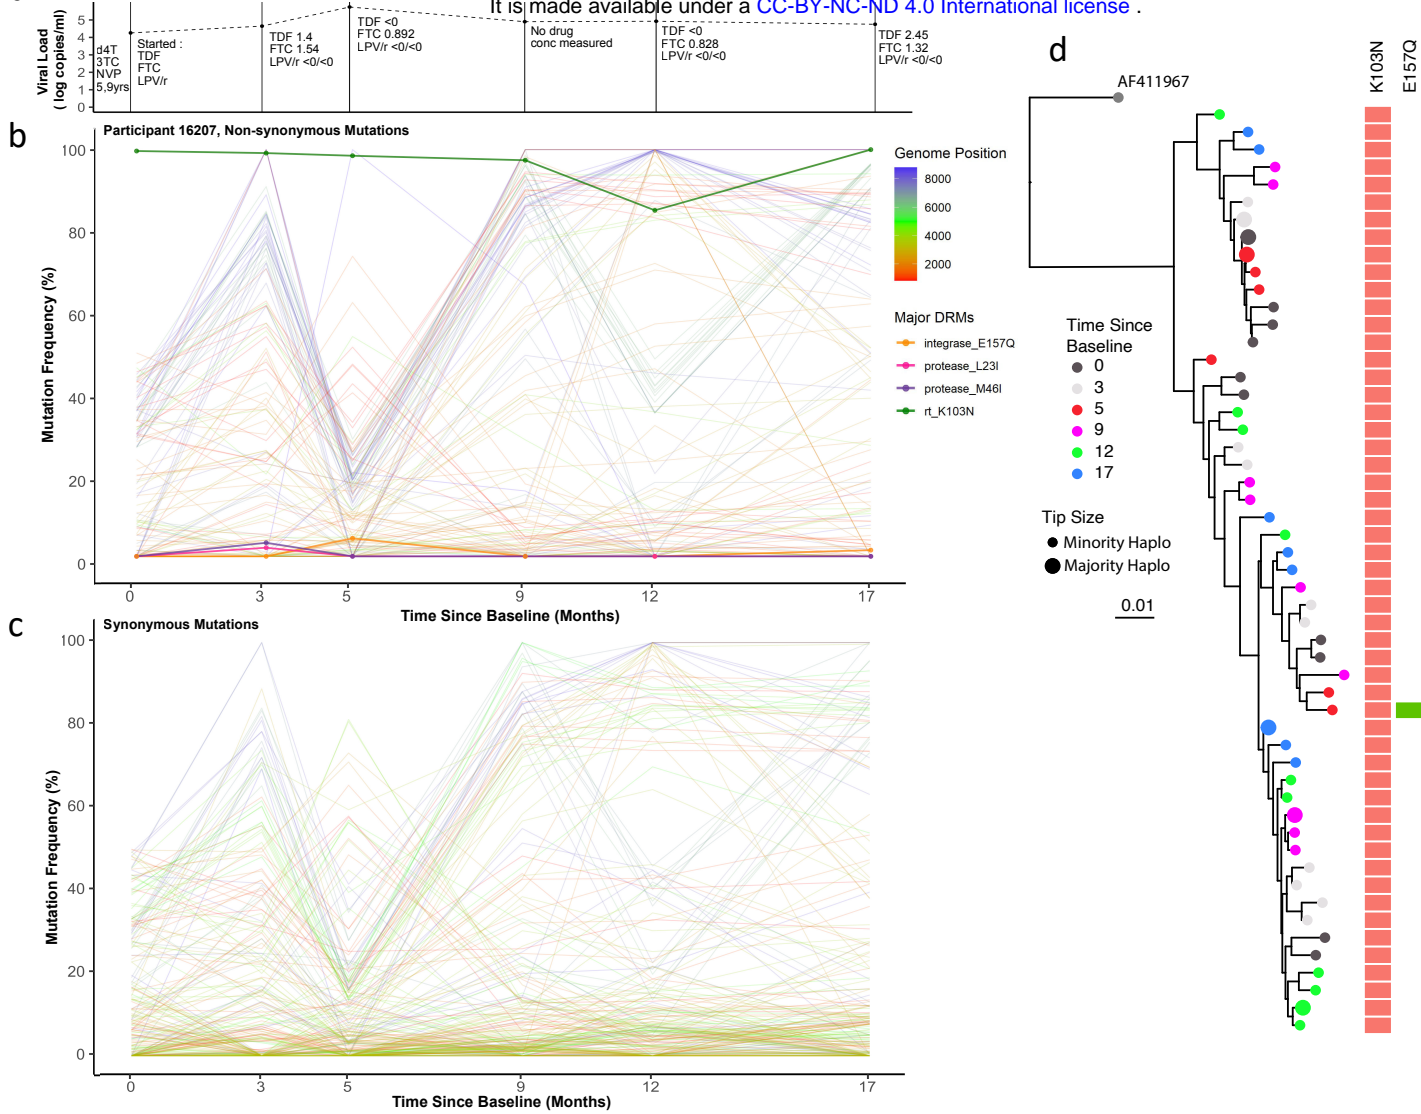

**Figure 5. Drug regimen, adherence and viral dynamics within participant 16207. A) Viral load and drug levels.** At successive timepoints regimen was noted and plasma drug concentration measured by HPLC (nmol/l). The participant displayed ongoing viraemia and poor adherence to the prescribed drug regimen. **B) Drug resistance and non-drug resistance associated non-synonymous mutations frequencies.** The participant had only one major RT mutation - K103N for the duration of the treatment period. Several antagonistic non-synonymous switches in predominantly *env* were observed between timepoints 1-4. **C) Synonymous mutation frequencies.** All mutations with a frequency of <10% or >90% at two or more timepoints were followed over successive timepoints. In contrast to non-synonymous mutations, most synonymous changes were in *pol*, indicative of linkage to the *env* coding changes. **D) Maximum-likelihood phylogeny of reconstructed haplotypes.** Haplotypes were again clearly divided into three distinct clades; each clade contained haplotypes from all timepoints, suggesting lack of hard selective sweeps and intermingling of viral haplotypes with softer sweeps. that most viral competition occurred outside of drug pressure.

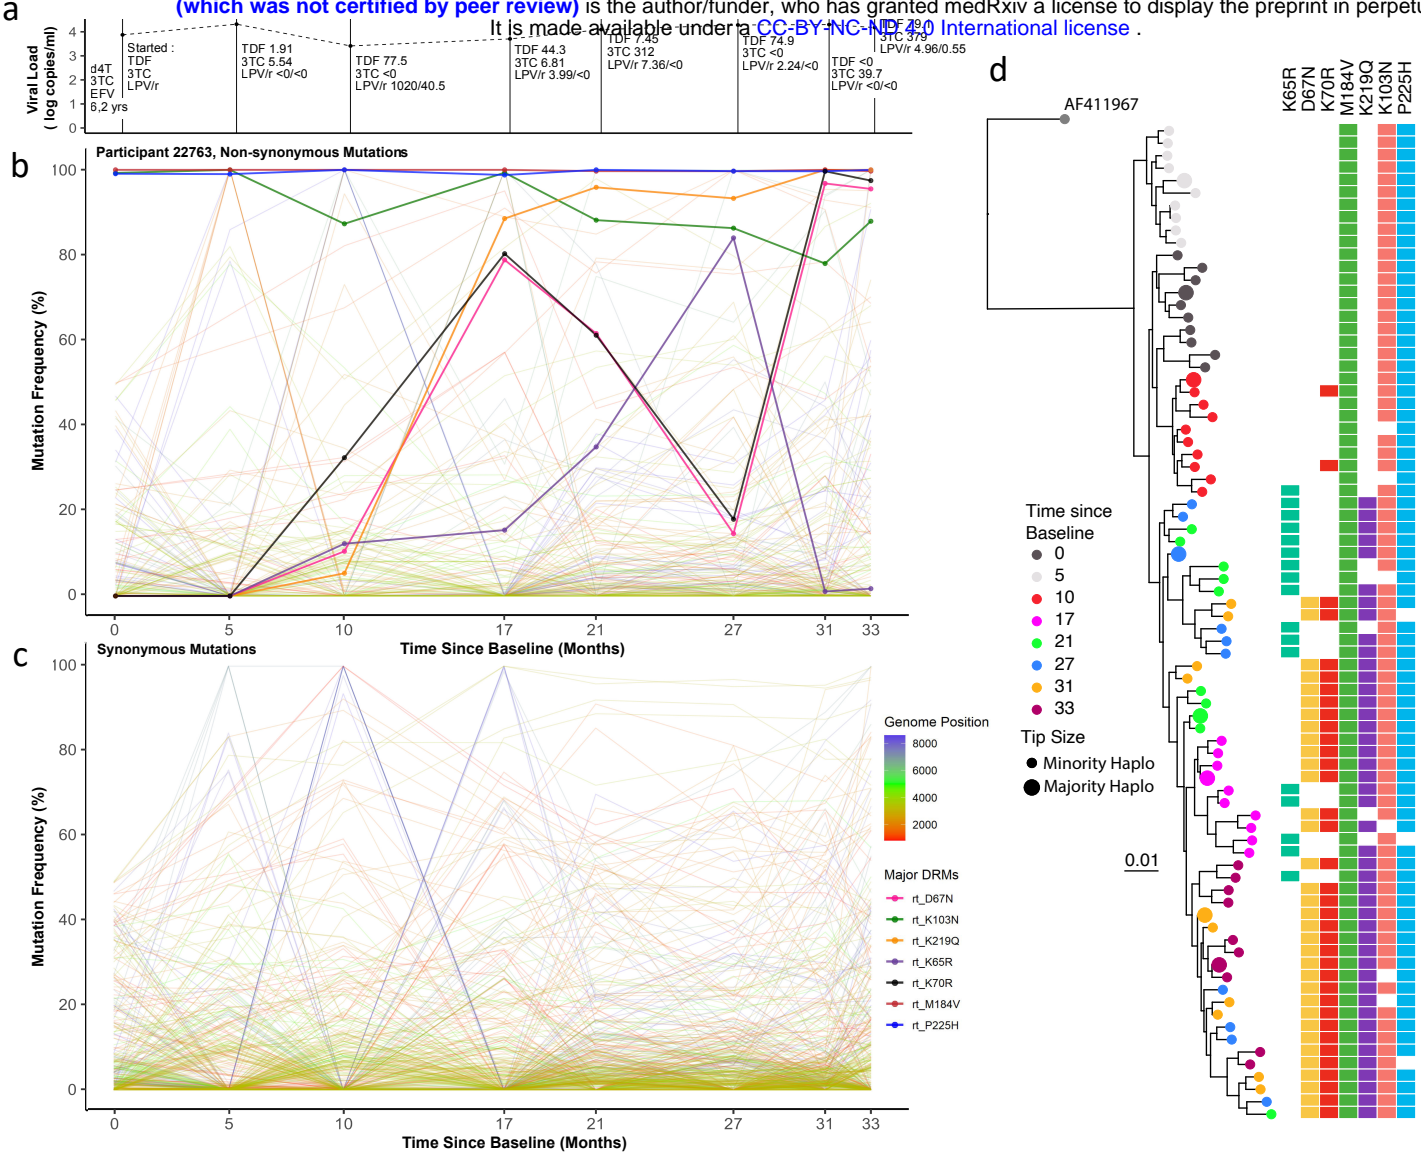

**Figure 6. Drug regimen, adherence and viral dynamics of participant 22763. A) Viral load and regimen adherence.** At successive timepoints the regimen was noted, and plasma drug concentration measured by HPLC (nmol/l). The participant had therapeutic levels of drug at several timepoints (3, 5 and 8), indicating variable adherence to the prescribed drug regimen. **B) Drug resistance and non-drug-resistance-associated non-synonymous mutation frequencies.** The participant had numerous drug resistance mutations in dynamic flux. Between timepoints 4-7, there was a complete population shift, indicated by reciprocal competition between the RT mutations K65R and the TAMs K67N and K70R. **C) Synonymous mutations frequencies.** All mutations with a frequency of <10% or >90% at two or more timepoints were followed over successive timepoints. Several *env* mutations mimicked the non-synonymous shifts observed between timepoints 2-4, suggestive of linkage. **D) Maximum-likelihood phylogeny of reconstructed haplotypes.** timepoints 1-4 were found in distinct lineages. In later timepoints, from 5-8, haplotypes became more intermingled, whilst maintaining antagonism between K65R and K67N bearing viruses.
