1 **HIV-1 evolutionary dynamics under non-suppressive antiretroviral therapy**

2

3 Steven A. Kemp<sup>1\*\*†</sup>, Oscar J. Charles<sup>2†</sup>, Anne Derache<sup>3</sup>, Werner Smidt<sup>3</sup>, Darren P. Martin<sup>4</sup>, on behalf of  
4 the ANRS 12249 TasP Study Group, Deenan Pillay<sup>2</sup>, Richard A. Goldstein<sup>2</sup> & Ravindra K. Gupta<sup>2,3</sup>

5

6 <sup>1</sup>. Cambridge Institute of Therapeutic Immunology & Infectious Disease (CITIID), Cambridge, UK

7 <sup>2</sup> Division of Infection & Immunity, University College London, London, UK

8 <sup>3</sup>. Africa Health Research Institute, Durban, South Africa

9 <sup>4</sup>. Department of Integrative Biomedical Sciences, University of Cape Town, South Africa

10

11 <sup>†</sup>Authors contributed equally

12

13 Address for correspondence:

14 Steven A Kemp

15 Cambridge Institute for Therapeutic Immunology and Infectious Diseases

16 Jeffrey Cheah Biomedical Centre

17 Cambridge CB2 0AW, UK

18 [sk2137@cam.ac.uk](mailto:sk2137@cam.ac.uk)

19

20 or

21

22 Ravindra K Gupta

23 Cambridge Institute for Therapeutic Immunology and Infectious Diseases

24 Jeffrey Cheah Biomedical Centre

25 Cambridge CB2 0AW, UK

26 [Rkg20@cam.ac.uk](mailto:Rkg20@cam.ac.uk)

27

28

29

30

31

32

33

34

35 **Abstract**

36 Prolonged virologic failure on 2<sup>nd</sup>-line protease inhibitor (PI) based ART without emergence of major  
37 protease mutations is well recognised and provides an opportunity to study within-host evolution in  
38 long-term viraemic individuals. Using next-generation sequencing and *in silico* haplotype  
39 reconstruction we analysed whole genome sequences from longitudinal plasma samples of eight  
40 chronically infected HIV-1 individuals failing 2<sup>nd</sup>-line regimens from the ANRS 12249 TasP trial. On  
41 non-suppressive ART, there were large fluctuations in synonymous and non-synonymous variant  
42 frequencies despite stable viraemia. Reconstructed haplotypes provided evidence for selective  
43 sweeps during periods of partial adherence, and viral haplotype competition during periods of low  
44 drug exposure. Drug resistance mutations in reverse transcriptase (RT) were used as markers of viral  
45 haplotypes in the reservoir and their distribution over time indicated recombination. We  
46 independently observed linkage disequilibrium decay, indicative of recombination. These data  
47 highlight dramatic changes in virus population structure that occur during stable viremia under non  
48 suppressive ART.

49

50

51

## 52 Introduction

53 Even though HIV-1 infections are most commonly initiated with a single founder virus<sup>1</sup>, acute and  
54 chronic disease are characterised by extensive inter- and intra-patient genetic diversity<sup>2,3</sup>. The rate  
55 and degree of diversification is influenced by multiple factors, including selection pressures imposed  
56 by the adaptive immune system, exposure of the virus to drugs, and tropism/fitness constraints  
57 relating to replication and cell-to-cell transmission in different tissue compartments<sup>4,5</sup>. During HIV-1  
58 infection, high rates of reverse transcriptase- (RT) related mutation and high viral turnover during  
59 replication result in swarms of genetically diverse variants<sup>6</sup> which co-exist as quasispecies<sup>7,8</sup>. The  
60 existing literature on HIV-1 intrahost population dynamics is largely limited to untreated infections,  
61 in subtype B infected individuals<sup>9-12</sup>. These works have shown non-linear diversification of virus both  
62 towards and away from the founder strain during chronic untreated infection.

63

64 Viral population dynamics in long-term viraemic antiretroviral therapy (ART) treated individuals have  
65 not been characterised. HIV-1 rapidly accumulates drug-resistance associated mutations (DRMs),  
66 particularly during non-suppressive 1<sup>st</sup>-line ART<sup>5,13</sup>. As a result, ART-experienced patients failing 1<sup>st</sup>-  
67 line regimens for prolonged periods of time are characterised by high frequencies of common  
68 nucleoside reverse transcriptase (NRTI) and non-nucleoside reverse transcriptase (NNRTI) DRMs  
69 such as M184V, K65R and K103N<sup>14</sup>. Routinely, 2<sup>nd</sup>-line ART regimens consist of two NRTIs in  
70 conjunction with a boosted protease inhibitor (PI). Although PI DRMs are uncommonly reported<sup>15</sup>, a  
71 situation that differs for less potent drugs used in the early PI era<sup>5</sup>, multiple studies have indicated  
72 that diverse mutations accumulating in the *gag* gene during PI failure might impact PI  
73 susceptibility<sup>16-22</sup>. Common pathways for these diverse mutations have, however, been difficult to  
74 discern, likely reflecting multiple routes to drug escape.

75

76 Prolonged virological failure on PI-based regimens without the emergence of PI DRMs provides an  
77 opportunity to study evolution under partially suppressive ART. The process of selective sweeps in  
78 the context of HIV-1 infection has previously been described<sup>23,24</sup>. Although major PI DRMs and other  
79 non-synonymous mutations in regulatory regions such as *pol*, can significantly lower fitness<sup>2,25,26</sup>,  
80 these studies typically are oblivious to temporal sequencing.

81

82 We have deployed next-generation sequencing of stored blood plasma specimens from patients in  
83 the Treatment as Prevention (TasP) ANRS 12249 study<sup>27</sup>, conducted in Kwazulu-Natal, South Africa.  
84 All patients were infected with HIV-1 subtype C and characterised as failing 2<sup>nd</sup>-line regimens  
85 containing Lopinavir and Ritonavir (LPV/r), with prolonged virological failure in the absence of major

86 known PI mutations<sup>28</sup>. In this manuscript, we report details of evolutionary dynamics during non-  
87 suppressive 2<sup>nd</sup>-line ART. By sampling patients consistently over two or more years, we propose that  
88 ongoing evolution is driven by the dynamic flux between genetic drift, fitness driven selection and  
89 recombination, exemplified by resistance mutations that have undergone reassortment across  
90 haplotypes through recombination.

91

## 92 **Results**

### 93 **Patient Characteristics**

94 Eight south African patients with virological failure of 2<sup>nd</sup>-line PI-based ART, with between three and  
95 eight timepoints and viraemia >1000 copies/ml were selected from the French ANRS TasP trial for  
96 viral dynamic analysis. Collected patient metadata included viral loads, regimens and time since ART  
97 initiation (**Table 1**). HIV RNA was isolated from venous blood samples and subject to whole-genome  
98 sequencing (WGS) using Illumina technology; from this whole-genome haplotypes were  
99 reconstructed using sites with a depth of  $\geq 100$  reads (**Supplementary Figure 1**). Prior to  
100 participation in the TasP trial, patients accessed 1st-line regimens for an average of 5.6yrs ( $\pm 2.7$ yrs).  
101 At baseline enrolment into TasP (whilst failing 1<sup>st</sup>-line regimens), the median patient viral load was  
102  $4.96 \times 10^{10}$  copies/ml (IQR:  $4.17 \times 10^{10}$  –  $5.15 \times 10^{10}$ ); twelve DRMs were found at a threshold of >2%;  
103 the most common of which were the RT mutations. K103N, M184V and P225H, which are consistent  
104 with previous use of d4T, NVP, EFV and FTC/3TC. Six of the eight patients had minority frequency  
105 DRMs associated with PI failure (average 6.4%) which were usually seen only in one sample per  
106 patient throughout the longitudinal sampling. Observed mutations included L23I, I47V, M46I/L,  
107 G73S, V82A, N83D and I85V (**Supplementary Tables 1a-3c**). Viral populations of four of the eight  
108 patients also carried major integrase strand inhibitor (INSTI) mutations, also at minority frequencies  
109 (average 5.0%) and also usually at single timepoints (T97A, E138K, Y143H, Q148K). Of note, patients  
110 were maintained on protease inhibitors during viremia as poor adherence was suspected as the  
111 reason for ongoing failure. Sanger sequencing of all subtype C viruses was undertaken during routine  
112 clinical monitoring and was consistent with NGS data (**Supplementary Tables 1a-3c**) regarding the  
113 absence of PI DRMS.

114

### 115 **SNP frequencies and measures of diversity/divergence over time**

116 WGS data was used to measure the changing frequencies of viral single nucleotide polymorphisms  
117 (SNPs) relative to a dual-tropic subtype C reference sequence (AF411967) within individuals over  
118 time (**Figure 1a-b**). The number of longitudinal synonymous SNPs mirrored the number of non-  
119 synonymous SNPs, but the former were two-to-three-fold more common. Diversification was

120 considered by counting the number of SNPs relative to the reference sequence. There were dynamic  
121 changes in the numbers of SNPs over time, with both increases and decreases in numbers of SNPs,  
122 suggesting population competition, and/or the occurrence of selective sweeps. From timepoint two  
123 onwards (all patients now on 2<sup>nd</sup>-line, PI-containing regimens for >6 months), all patients (except  
124 28545) had increases in both synonymous and non-synonymous SNPs.

125

126 In previous literature, viral populations within untreated, chronically infected HIV-1 patients have  
127 been shown to revert towards the founder or infecting virus states<sup>9</sup>. We repeated this analysis with  
128 our chronically infected, but treated, HIV-1 population, considering separately the earliest consensus  
129 sequence, HIV-1 subtype C consensus and M group consensus sequences as founder strains.  
130 Divergence from the founder strain per patient timepoint was measured by calculating the genetic  
131 distance between patient and founder for each longitudinal sample.

132

133 To assess if 1) there was a general trend of reversion to founder and 2) time was an explanatory  
134 variable to that trend, we utilised a Linear Mixed Effects Model (LMEM). Divergence from the  
135 founder was modelled as the response, each patient was treated as a random effect, and time from  
136 first patient sample treated as a fixed effect “time”. Modelling the whole genome sequences  
137 indicated that there was no significant effect of time (in months) on viral diversification or reversion  
138 to the infecting/baseline strain, or ancestral C state (**Figures 1C-D, Supplementary table 4**).

139

140 When assessing the constituent 1000 bp genomic regions of each alignment, four genomic regions  
141 were significant for divergence from the ancestral C state, indicating time in months impacted viral  
142 divergence. This revealed that in portions of the genome (*pol*, *vpu* and *env*) there was sufficient  
143 statistical support to confirm that there was ongoing divergence from the subtype C consensus.  
144 However, correction for false discovery rate (FDR) with a Benjamini Hochberg correction revealed  
145 that this divergence was not significant. Divergence from these ancestral sequences is likely enabled  
146 by recombination, which unlinks hyper-variable loci from strongly constrained neighbouring sites.  
147 We found no evidence for reversions and were therefore unable to conclude that these patients are  
148 reverting to founder as described in previous literature<sup>9,29</sup>.

149

150 To assess the relationship of the observed divergence patterns, we examined nucleotide diversity by  
151 considering all pairwise nucleotide distances of each consensus sequence, by timepoint and patient  
152 utilizing multidimensional scaling<sup>30</sup>. Intra-patient nucleotide diversity varied considerably between  
153 patients (**Figure 2a**). Viruses from some patients showed little diversity between timepoints (e.g.

154 patient 16207), whereas those from others showed higher diversity between timepoints (e.g. patient  
155 22763). In some instances, a patient's viruses were tightly clustered suggesting little change over  
156 time (**Figure 3A**, patients 16207, 26892 & 47939) compared to others (patients 22828 & 28545). To  
157 corroborate the MDS approach, we used an alternative novel method of examining nucleotide  
158 diversity of longitudinal timepoints using all positional information from BAM files (**Supplementary**  
159 **Figure 2**).

160

### 161 **Phylogenetic analysis of inferred haplotypes**

162 The preceding diversity assessments suggested the existence of distinct viral haplotypes within each  
163 patient. We therefore used a recently reported computational tool HaROLD<sup>31</sup> to infer 289 unique  
164 haplotypes across all patients, with between 11 and 32 haplotypes (average 21) per patient. The  
165 number haplotypes changed dynamically between successive timepoints indicative of dynamically  
166 shifting populations (**Figure 2B**). To confirm plausibility of haplotypes, a phylogeny of all consensus  
167 sequences was inferred (**Supplementary Figure 3**) and a MDSplot of all viral haplotypes was  
168 constructed (**Supplementary Figure 4**).

169

### 170 **Linkage Disequilibrium and Recombination**

171 LD between two pairwise loci is reduced by recombination, such that LD tends to be higher for loci  
172 that are close and lower for more distant loci<sup>32</sup>. HIV-1 is known to recombine such that sequences  
173 are not generally in linkage disequilibrium (LD) beyond 400bp<sup>9</sup>. The significance of recombination in  
174 an intra-host, chronic infection setting is less well understood<sup>33</sup>. To assess whether intra-patient  
175 recombination was occurring between the haplotypes observed in each of the three most sampled  
176 patients, we determined LD decay patterns. We assumed that if there was random recombination,  
177 this would equate to smooth LD decay patterns. This was not observed. Rather, each patient  
178 demonstrated a complex decay pattern, consistent with non-random recombination along the  
179 genome (**Figure 3A**). Given this, we characterised recombination patterns (**Figure 3B**). Inferred  
180 recombination breakpoints were identified within patients over successive timepoints  
181 (**Supplementary Figure 5**). DRMs accumulated over successive timepoints for patient 22763,  
182 whereas in patient 15664 the reverse was true. Patient 16207 had recombinant breakpoints  
183 localised in the *pol* gene in two timepoints, though it retained its majority DRM (K103N) across all  
184 haplotype populations, possibly as a result of K103N being acquired as a transmitted DRM, or as all  
185 variants were under the same selective pressure.

186

### 187 **Changing landscapes of non-synonymous and synonymous mutations**

188 In the absence of major PI mutations, we first examined non-synonymous mutations across the  
189 whole genome (**Figures 4-6**), with a specific focus on *pol* (to identify known first and second line  
190 NRTI-associated mutations) and *gag* (given its known involvement in PI susceptibility). We and  
191 others have previously shown that *gag* mutations accumulate during non-suppressive PI therapy<sup>34,35</sup>.  
192 There are also data suggesting associations between *env* mutations and PI exposure<sup>36,37</sup>.  
193 **Supplementary Tables 1-3** summarise the changes in variant frequencies of *gag*, *pol* and *env*  
194 mutations in patients over time. We found between two and four mutations at sites previously  
195 associated with PI resistance in each patient, all at persistently high frequencies (>90%) even in the  
196 absence of presumed drug pressure. This is explained by the fact that a significant proportion of  
197 sites associated with PI exposure are also polymorphic across HIV-1 subtypes<sup>20,38</sup>. To complement  
198 this analysis, we examined underlying synonymous mutations across the genome. This revealed  
199 complex changes in the frequencies of multiple nucleotide residues across all genes. These changes  
200 often formed distinct ‘chevron-like’ patterns between timepoints (**Figures 4C & 5B**), indicative of  
201 linked alleles dynamically shifting, which is in turn suggestive of competition between viral  
202 haplotypes.

203

204 Three patients (15664, 16207 and 22763) which had the greatest number of timepoints for ongoing  
205 comparison, and had the highest read coverage, were selected for in-depth viral dynamics analysis  
206 as discussed below.

207

208 **Patient 15664** had consistently low plasma concentrations of all drugs at each measured timepoint,  
209 with detectable levels measured only at month 15 and beyond (**Figure 4A**). At baseline, whilst on  
210 NNRTI-based 1<sup>st</sup>-line ART, known NRTI (M184V) and NNRTI (K103N and P225H) DRMs<sup>5</sup> were at high  
211 prevalence in the virus populations; which is as expected whilst adhering to 1<sup>st</sup>-line treatments.  
212 Haplotype reconstruction and subsequent analysis inferred the presence of a majority haplotype  
213 carrying all three of these mutations at baseline, as well as a minority haplotype with the absence of  
214 P225H (**Figure 4D**, dark grey circles). Following the switch to a 2<sup>nd</sup>-line regimen, variant frequencies  
215 of M184V and P225H dropped below detection limits (<2% of reads), whilst K103N remained at high  
216 frequency (**Figure 4B**). Haplotype analysis was concordant, revealing that viruses with K103N,  
217 M184V and P225H were replaced by haplotypes with only K103N (**Figure 4D**, light grey circles). At  
218 timepoint two (month 8), there were also numerous synonymous mutations observed at high  
219 frequency in both *gag* and *pol* genes, corresponding with the switch to a 2<sup>nd</sup>-line regimen. At  
220 timepoint three (15 months post-switch to 2<sup>nd</sup>-line regimen) drug concentrations were highest,  
221 though still low in absolute terms, indicating poor adherence. Between timepoints three and four we

222 observed a two-log reduction in viral load, with a modest change in frequency of RT DRMs. However,  
223 we observed synonymous variant frequency shifts predominantly in both *gag* and *pol* genes, as  
224 indicated by multiple variants increasing and decreasing contemporaneously, creating characteristic  
225 chevron patterning (**Figure 4B**). However, many of the changes were between intermediate  
226 frequencies, (e.g. between 20% and 60%), which differed from changes between time points one  
227 and two where multiple variants changed more dramatically in frequency from <5% to more than  
228 80%, indicating harder selective sweeps. These data are in keeping with a soft selective sweep  
229 between time points three and five. Between timepoints five and six, the final two samples, there  
230 was another population shift - M184V and P225H frequencies fell below the detection limit at  
231 timepoint six, whereas the frequency of K103N dropped from almost 100% to around 80% (**Figure**  
232 **4B**). This was consistent with the haplotype reconstruction, which inferred a dominant viral  
233 haplotype at timepoint six bearing only K103N, as well as three minor haplotype with no DRMs at all  
234 (**Figure 4D**, light blue circles).

235

236 The phylogeny of inferred haplotype sequences showed that haplotypes from all timepoints were  
237 interspersed throughout the tree (except at timepoint 4, which remained phylogenetically distinct).  
238 DRMs showed some segregation by clade; viruses carrying a higher frequency of DRMs (M184V,  
239 P225H and K238T) were observed in clade A (**Figure 4D**), and those with either K103N alone, or no  
240 DRMs were preferentially located clade C (**Figure 4D**). However, this relationship was not clear cut,  
241 and therefore consistent with competition between haplotypes during low drug exposure. Soft  
242 sweeps were evident, given the increasing diversity (**Figure 1, Supplementary Figure 4**) of this  
243 patient.

244

245 **Patient 16207**. Viral load in this patient were consistently above 10,000 copies/ml (**Figure 5A**). As  
246 with patient 15664, detectable drug concentrations in blood plasma were either extremely low or  
247 absent at each measured timepoint, consistent with non-adherence to the prescribed regimen.  
248 There was little change in the frequency of DRMs throughout the follow-up period, even when  
249 making the switch to the 2<sup>nd</sup>-line regimen. NNRTI resistance mutations such as K103N are known to  
250 have minimal fitness costs<sup>26</sup> and can therefore persist in the absence of NNRTI pressure. Throughout  
251 treatment the viruses from this patient maintained K103N at a frequency of >85% but also carried an  
252 integrase strand transfer inhibitor (INSTI) associated mutation (E157Q) and PI-exposure associated  
253 amino acid replacements (L23I and M46I) at low frequencies at timepoints two and three. Despite  
254 little change in DRM site frequencies, very significant viral population shifts were observed at the  
255 whole genome level; again indicative of selective sweeps (**Figures 5B-C**). Between timepoints one



256 and four, several linked mutations changed abundance contemporaneously, generating chevron-like  
257 patterns of non-synonymous changes in *env* specifically (blue lines, **Figure 5B**). A large number of  
258 alleles increased in frequency from <40% to >80% at timepoint one, followed by decreases in  
259 frequency from >70% to <30% at timepoint three. Whereas large shifts in *gag* and *pol* alleles also  
260 occurred, the mutations involved were almost exclusively synonymous (red and green lines).

261

262 Phylogenetic analysis of inferred whole genome haplotypes again showed a distinct cladal structure  
263 as observed in patient 15664 (**Figure 5D**), although the dominant haplotypes were equally observed  
264 in the upper clade (A) and lower clade (C) (**Figure 5D**). K103N was the majority DRM at all  
265 timepoints, except for a minority haplotype at timepoint three, also carrying E157Q. Haplotypes did  
266 not cluster by time point. Significant diversity in haplotypes from this patient was confirmed by MDS  
267 (**Supplementary Figure 4**).

268

269 **Patient 22763** was notable for a number of large shifts in variant frequencies across multiple drug  
270 resistance associated residues and synonymous sites. Drug plasma concentration for different drugs  
271 was variable yet detectable at most measured timepoints. This suggests that the patient took some  
272 of their prescribed drugs throughout the follow-up period (**Figure 6A**). Non-PI DRMs such as M184V,  
273 P225H and K103N were present at baseline (time of switch from first to second line treatments).  
274 These mutations persisted despite synonymous changes between time points one and two. Most of  
275 the highly variable synonymous changes in this patient were found in the *gag* and *pol* genes (as in  
276 patient 16207) (**Figure 6C**), but in this case *env* displayed large fluctuations in synonymous and non-  
277 synonymous allelic frequencies over time. At timepoint three, therapeutic concentrations of boosted  
278 lopinavir (LPV/r) and tenofovir (TDF) were measured in plasma and haplotypes clustered separately  
279 from the first two timepoints (**Figure 6D**, light and dark grey circles). NGS confirmed that the D67N,  
280 K219Q, K65R, L70R, M184V DRMs and NNRTI-resistance mutations were present at low frequencies  
281 from timepoint three onwards. Of note, between timepoints three and six, therapeutic  
282 concentrations of TDF were detectable, and coincided with increased frequencies of the canonical  
283 TDF DRM, K65R<sup>5</sup>. The viruses carrying K65R outcompeted those carrying the thymidine analogue  
284 mutants (TAMs) D67N and K70R, whilst the lamivudine (3TC) associated resistance mutation,  
285 M184V, persisted throughout. In the final three timepoints M46I emerged in *protease*, but never  
286 increased in frequency above 6%. At timepoint seven, populations shifted again with some  
287 haplotypes resembling those previously seen in timepoint four, with D67N and K70R again being  
288 predominant over K65R in *reverse transcriptase* (**Figure 6D**, green and blue circles). At the final

289 timepoint (eight) the frequency of K103N was approximately 85% and the TAM-bearing populations  
290 continued to dominate over the K65R population, which at this timepoint had a low frequency.

291

292 Although the DRM profile suggested the possibility of a selective sweep, we observed the same  
293 groups of other non-synonymous or synonymous alleles exhibiting dramatic frequency shifts, but to  
294 a lesser degree than in patients 16207 and 15664 i.e. ‘chevron patterns’ were less pronounced,  
295 outside of the *env* gene (**Figure 6B-C**). Variable drug pressures placed on the viral populations  
296 throughout the 2<sup>nd</sup>-line regimen appear to have played some role in limiting haplotype diversity.  
297 Timepoints 1-4 all formed distinct clades, without intermingling, indicating that competition  
298 between populations was not occurring to the same degree as in previous patients. Some inferred  
299 haplotypes had K65R and others the TAMs D67N and K70R. K65R was not observed in combination  
300 with D67N or K70R, consistent with previously reported antagonism between K65R and TAMs  
301 whereby these mutations are not commonly found together within a single genome<sup>39-41</sup>. One  
302 explanation for the disconnect between the trajectories of DRM frequencies over time and  
303 haplotype phylogeny is competition between different viral populations. Alternatively, emergence of  
304 haplotypes from previously unsampled reservoirs with different DRM profiles is possible, but one  
305 might have expected other mutations to characterise such haplotypes that would manifest as  
306 changes in the frequencies of large numbers of other mutations.

307

### 308 **Discussion**

309 The proportion of people living with HIV (PLWH) who are accessing ART has increased from 24% in  
310 2010, to 68% in 2020<sup>42,43</sup>. However, with the scale-up of ART, there has also been an increase in both  
311 pre-treatment drug resistance (PDR)<sup>44,45</sup> and acquired drug resistance<sup>14,46</sup> to 1st-line ART regimens  
312 containing NNRTIs. Integrase inhibitors (specifically dolutegravir) are now recommended for first-  
313 line regimens by the WHO in regions where PDR exceeds 10%<sup>47</sup>. Boosted PI-containing regimens  
314 remain second line drugs following first 1<sup>st</sup>-line failure, though one unanswered question relates to  
315 the nature of viral populations during failure on PI-based ART where major mutations in *protease*,  
316 described largely for less potent PIs, have not emerged. Here we have comprehensively analysed  
317 viral populations present in longitudinally collected plasma samples of chronically infected HIV-1  
318 patients under non-suppressive 2<sup>nd</sup>-line ART.

319

320 With the vast majority of PLWH ho have been treated in the post-ART era, virus dynamics during  
321 non-suppressive ART are important to understand, as there may be implications for future  
322 therapeutic success. For example, broadly neutralising antibodies (bNab) are being tested not only

323 for prevention, but also as part of remission strategies in combination with latency reversal agents.  
324 We know that HIV sensitivity to broadly neutralising antibodies (bNab) is dependent on *env*  
325 diversity<sup>48,49</sup>, and therefore prolonged ART failure with viral diversification could compromise  
326 sensitivity to these agents.

327

328 Our understanding of virus dynamics largely stems from studies that were limited to untreated  
329 individuals<sup>12</sup>, with mostly subgenomic data analysed rather than whole genomes<sup>12</sup>. Traditional  
330 analyses of quasispecies distributions, for example as reported by Yu et al<sup>50</sup>, suggest that viral  
331 diversity increases in longitudinal samples. However, the findings of Yu et al were based entirely on  
332 short-read NGS data without considering whole-genome haplotypes. The added benefit of  
333 examining whole genomes is that linked mutations can be identified statistically using an approach  
334 that we recently developed<sup>31</sup>. Indeed, haplotype reconstruction has proved beneficial in the analysis  
335 of compartmentalisation and diversification of several RNA and DNA viruses, including HIV-1, CMV  
336 and SARS-CoV-2<sup>34,51,52</sup>.

337

338 Key findings of this study were, firstly that diversity as defined by the number of quasispecies in each  
339 sample, typically increased over time. Considering divergence, (a measure at consensus level for  
340 how many mutations have accumulated in a current sequence, from the founder infection) in  
341 contrast to previous literature which showed that there was a degree of reversion to the founder  
342 strain<sup>9</sup>, we show that there was no significant reversion in our study population. There was also no  
343 significant divergence from baseline or ancestral C consensus sequences when considering the  
344 whole genome. However, when considering 1000bp fragments of the genome in a sliding window,  
345 several regions in *pol*, *vpu* and *env* significantly diverged from the consensus C sequence.

346

347 A second key finding in our study was that synonymous mutations were generally two-to-three fold  
348 more frequent than non-synonymous mutations during non-suppressive ART during chronic  
349 infection - a finding in contrast to that seen previously in a longitudinal study of untreated  
350 individuals<sup>2,12,50</sup>. Non-synonymous changes were enriched in known polymorphic regions such as *env*  
351 whereas synonymous changes were more often observed to fluctuate in the conserved *pol* gene.  
352 This finding may reflect early versus chronic infection and differing selective pressures. Haplotype  
353 reconstruction revealed evidence for competing haplotypes, with phylogenetic evidence for  
354 numerous soft selective sweeps in that haplotypes intermingled during periods where there were  
355 low drug concentrations measured in the blood plasmas of patients. Non-adherence to drug  
356 regimens therefore offers opportunity for the HIV-1 reservoir to increase in size and is associated

357 with higher levels of residual viraemia<sup>53</sup>, preventing future viral suppression due to accumulation  
358 and maintenance of beneficial mutations.

359

360 Individuals in the present study were treated with Ritonavir-boosted Lopinavir along with two NRTIs  
361 (typically Tenofovir + Emtricitabine). We observed significant changes in the frequencies of NRTI  
362 mutations in two of the three patients studied in-depth. We saw evidence for possible archived virus  
363 populations with DRMs emerging during follow-up in that large changes in DRM frequency were not  
364 always accompanied by changes at other sites. This is consistent both with the occurrence of soft  
365 selective sweeps and previous observations that non-DRMs do not necessarily drift with other  
366 mutations to fixation<sup>23</sup>. As frequencies of RT DRMs did not always segregate with haplotype  
367 frequencies (i.e. the same mutations were repeatedly observed on different genetic backgrounds),  
368 we suggest that a high number of recombination events, known to be common in HIV infections,  
369 were likely contributing to the observed haplotypic diversity.

370

371 Although no patient developed major resistance mutations to PIs at consistently high frequencies  
372 (<https://hivdb.stanford.edu/dr-summary/resistance-notes/PI/>), we did observe non-synonymous  
373 mutations in *gag* which have been previously associated to mediate resistance to PI. There was,  
374 however, no temporal evidence of specific mutations being associated with selective sweeps. For  
375 example, PI exposure-associated residues in matrix (positions 76 and 81) were observed in patient  
376 16207 prior to PI initiation<sup>54</sup>. Furthermore, patient 16207 was one of two patients who achieved  
377 low-level viraemic suppression (45-999 copies/ml) of viral replication at one or two timepoints. After  
378 both of these partial suppressions, the rebound populations appeared to be less diverse, consistent  
379 with drug-resistant viruses re-emerging.

380

381 Mutations at sites in the HIV genome that are further apart than 100bp are subject to frequent  
382 shuffling via recombination<sup>55</sup>. Unlike the smooth LD decay curves for pairs of HIV mutations reported  
383 in the literature, we identified complex LD decay patterns within the genomes of viruses from  
384 individual patients: patterns indicative of non-random recombination. Recombination appears as the  
385 loss and gain of common genomic regions over successive timepoints between each patient's  
386 haplotype populations (**Figure 3B**). Viruses from patient 15664 with inter-haplotype recombination  
387 events detectable in the *vif* and *vpr* genes were present at four of the six analysed timepoints. In  
388 contrast, viruses in patient 22763 had evidence of inter-haplotype recombination events in the *gag*-  
389 *pol* genes were present at three of the eight analysed timepoints. We explain these recombination  
390 events detectable in longitudinally sampled sequences, as reflected in the previously discussed

391 'chevron' patterns whereby variants increase and subsequently decrease between timepoints. HIV  
392 quasispecies foster a degree of genetic diversity that facilitate rapid adaptive evolution through  
393 recombination whenever there exists within the quasispecies combinations of mutations that  
394 provide fitness advantages<sup>8</sup>. The relationship between recombination and the accumulation of  
395 multiple DRMs within individual genomes is not clearly evident within the analysed sequence  
396 datasets, with viruses sampled from each patient showing unique patterns of recombination. Inter-  
397 haplotype recombinants detected at timepoints two and six in patient 16207 had recombination  
398 events in *pol* that involved the transfer of the major DRM, K103N. Three independent Inter-  
399 haplotype recombination events detected in *pol* of patient 22763 viruses at timepoints two, four and  
400 six resulted in no change in DRMs at timepoint two, the gain of DRMs at timepoint four and loss of  
401 DRMs at timepoint six. The recombination dynamics in this patient were occurring against a  
402 backdrop of apparent antagonism between TAMs and DRMs (K65R and D67N). Finally, patient 15664  
403 steadily lost DRMs throughout the longitudinal sampling period, although we found no evidence of  
404 recombination being implicated in this loss. This suggests that, in the absence of strong drug  
405 pressures, viral populations only maintained DRMs which were crucial for providing resistance to  
406 drugs that the patient was variably adhering to at the time.

407

408 Phylogenetic analyses of whole genome viral haplotypes demonstrated two common features: (1)  
409 evidence for selective sweeps following therapy switches or large changes in plasma drug  
410 concentrations, with hitchhiking of synonymous and non-synonymous mutations; and (2)  
411 competition between multiple viral haplotypes that intermingled phylogenetically alongside soft  
412 selective sweeps. The diversity of viral populations was maintained between successive timepoints  
413 with ongoing viremia, particularly in *env*. Changes in haplotype dominance were often distinct from  
414 the dynamics of drug resistance mutations in *reverse transcriptase* (RT), indicating the presence of  
415 softer selective sweeps and/or recombination.

416

417 This study had some limitations – we examined eight patients with ongoing viraemia and variable  
418 adherence to 2<sup>nd</sup>-line drug regimens, with three of these being examined in-depth. Despite the small  
419 sample size, this type of longitudinal sampling of ART-experienced patients is unprecedented. We  
420 are confident that the combination of computational analyses has provided a detailed  
421 understanding of viral dynamics under non-suppressive ART that will be applicable to wider  
422 datasets. The method used to reconstruct viral haplotypes *in silico* is novel and has previously been  
423 validated in HIV-1 positive patients coinfecting with CMV<sup>51</sup>. We are confident that the approach  
424 implemented by HaROLD has accurately, if conservatively, estimated haplotype frequencies and

425 future studies should look to validate these frequencies using an *in vitro* method such as single  
426 genome amplification.

427

428 Despite there being high viral loads present at each of the analysed timepoints, nuances of the  
429 sequencing method resulted in suboptimal gene coverage, particularly in the *env* gene. To ensure  
430 that uneven sequencing coverage did not bias our analyses, we ensured that variant analysis was  
431 only performed where coverage was >100 reads. We also utilised a second method of haplotype  
432 reconstruction, in order to determine concordance of DRM calls between the two methods used.  
433 We find that there was good concordance between the two methods, specifically highlighted by the  
434 antagonism between TAMs (D67N and K70R) and NRTI mutations (K65R) in patient 22763  
435 (**Supplementary Figures 6**).

436

437 In summary we have found compelling evidence of HIV-1 within-host viral diversification,  
438 recombination and haplotype competition during non-suppressive ART. In future patients failing PI-  
439 based regimens are likely to be switched to INSTI-based ART (specifically Dolutegravir in South  
440 Africa) prior to genotypic typing or resistance analysis. Although the prevalence of underlying major  
441 INSTI resistance mutations is low in sub-Saharan Africa<sup>56,57</sup>, data linking individuals with NNRTI  
442 resistance with poorer virological outcomes on Dolutegravir<sup>58</sup>, coupled with a history of intermittent  
443 adherence, warrant further investigation. Having shown that long-time intra-host PI failure increases  
444 the intra-patient diversity of HIV viral populations, monitoring future drug-failure cases will be of  
445 interest due to their capacity to maintain a reservoir of transmissible drug-resistant viruses, as well  
446 as impacting responses to future therapies.

447

448

## 449 **Methods**

### 450 **Study & Patient selection**

451 This cohort was nested within the French ANRS 12249 Treatment as Prevention (TasP) trial<sup>27</sup>. TasP  
452 was a cluster-randomised trial comparing an intervention arm which offered ART after HIV diagnosis  
453 irrespective of patient CD4 + count, to a control arm offering ART according to prevailing South  
454 African guidelines. In total, a subset of 44 longitudinal samples from eight chronically infected  
455 patients with virological failure of 2<sup>nd</sup>-line PI-based ART, with viraemia above 1000 copies/ml were  
456 analysed. From these eight patients, three patients with mean coverage of >2000 reads across the  
457 whole genome were selected for in-depth viral dynamic analysis. All samples were collected from  
458 blood plasma. The Illumina MiSeq platform was used and an adapted protocol for sequencing<sup>59</sup>.

459 Adherence to 2<sup>nd</sup>-line regimens was measured by high-performance liquid chromatography (HPLC)  
460 using plasma concentration of drug levels as a proxy. Drug levels were measured at each timepoint  
461 with detectable viral loads, post-PI initiation. Cut-offs for assessment of adherence were selected  
462 from published literature.

463

464 Ethical approval was originally grant by the Biomedical Research Ethics Committee (BFC 104/11) at  
465 the University of KwaZulu-Natal, and the Medicines Control Council of South Africa for the TasP trial  
466 (Clinicaltrials.gov: [NCT01509508](#); South African Trial Register: DOH-27-0512-3974). The study was  
467 also authorized by the KwaZulu-Natal Department of Health in South Africa. Written informed  
468 consent was obtained from all patients. Original ethical approval also included downstream  
469 sequencing of blood plasma samples and analysis of those sequences to better understand drug  
470 resistance. No additional ethical approval was required for this.

471

#### 472 **Illumina Sequencing**

473 Sequencing of viral RNA was performed as previously described by Derache et al <sup>60</sup> using a modified  
474 protocol previously described by Gall et al <sup>61</sup>. Briefly, RNA was extracted from 1ml of plasma with  
475 detectable viral load of >1000 copies/ml, using QIAamp Viral RNA mini kits (Qiagen, Hilden,  
476 Germany), and eluted in 60µl of elution buffer. The near-full HIV genome was amplified with four  
477 HIV-1 subtype C primer pairs, generating 4 overlapping amplicons of between 2100 and 3900kb.

478

479 DNA concentrations of amplicons were quantified with the Qubit dsDNA HS Assay kit (Invitrogen,  
480 Carlsbad, CA). Diluted amplicons were pooled equimolarly and prepared for library using the Nextera  
481 XT DNA Library preparation and the Nextera XT DNA sample preparation index kits (Illumina, San  
482 Diego, CA), following the manufacturer's protocol.

483

#### 484 **Genomics & Bioinformatics**

485 Poor quality reads (with Phred score <30) and adapter sequences were trimmed from FastQ files  
486 with TrimGalore! v0.6.519 <sup>62</sup> and mapped to a dual-tropic, clade C, south African reference genome  
487 (AF411967) with minimap2<sup>63</sup>. The reference genome was manually annotated in Geneious Prime  
488 v2020.3 with DRMs according to the Stanford HivDB <sup>64</sup>. Optical PCR duplicate reads were removed  
489 using Picard tools (<http://broadinstitute.github.io/picard>). Finally, QualiMap2 <sup>65</sup> was used to assess  
490 the mean mapping quality scores and coverage in relation to the reference genome for the purpose  
491 of excluding poorly mapped sequences from further analysis. Single nucleotides polymorphisms  
492 (SNPs) were called using VarScan2<sup>66</sup> with a minimum average quality of 20, minimum variant

493 frequency of 2% and in at least 100 reads. These were then annotated by gene, codon and amino  
494 acid alterations using an in-house script<sup>67</sup> modified to utilise HIV genomes.

495

496 All synonymous and non-synonymous variants (including DRMs) were examined, and their frequency  
497 compared across successive timepoints. Synonymous variants were excluded from analysis if their  
498 prevalence remained at  $\leq 10\%$  or  $\geq 90\%$  across all timepoints. DRMs were retained for analysis if they  
499 were present at over 2% frequency and on at least two reads. A threshold of 2% is supported by a  
500 study evaluating different analysis pipelines, which reported fewer discordances over this cut-off<sup>68</sup>.

501

### 502 **Measuring Divergence or Reversion to Baseline & Consensus C Ancestor**

503 For each patient divergence over time from inferred founder state was measured for 1) the baseline  
504 sequence for each patient; and 2) a reconstructed subtype C consensus. The full length HIV-1  
505 subtype C consensus was downloaded from the LANL HIV database and annotations from the  
506 subtype C reference sequence (AF411967.3) used for haplotype reconstruction were transferred to  
507 this genome using Geneious Prime v2021.1.0 to ensure positions remained consistent throughout.

508

509 Divergence was measured as the pairwise distance between timepoint consensus and founder,  
510 calculated using the `dist.dna()` package with a TN93 nucleotide-nucleotide substitution matrix and  
511 with pairwise deletion as implemented in the R package `Ape` v.5.4.

512

### 513 **Linear Mixed Effects Models**

514 To investigate the general relationship of time in months to divergence, incorporating all 8 patients,  
515 we built a series of Linear Mixed Effect Models implemented in the `lmer` R package. Divergence was  
516 treated as the response, time as a fixed effect and patient as a random effect. We built similar  
517 models for the whole genome & discrete genomic portions analysis, for each founder strain. We  
518 tested if time had a non-0 effect on divergence by calculating p-value using Satterthwaite's method  
519 as implemented in the `lmerTest` package. For the 1000bp analyses, a Benjamini Hochberg correction  
520 adjustment was undertaken to account for 9 tests within the same sample.

521

### 522 **Haplotype Reconstruction & Phylogenetics**

523 Whole-genome viral haplotypes were constructed for each patient timepoint using HaROLD  
524 (Haplotype Reconstruction for Longitudinal Samples)<sup>31</sup>. The first stage consists of SNPs being  
525 assigned to each haplotype such that the frequency of variants is equal to the sum of the  
526 frequencies of haplotypes containing a specific variant. This considers the frequency of haplotypes in



527 each sample, the base found at each position in each haplotype and the probability of erroneous  
528 measurements at that site. Maximal log likelihood was used to optimise time-dependent  
529 frequencies for longitudinal haplotypes which was calculated by summing over all possible  
530 assignment of haplotype variants. Haplotypes were then constructed based on posterior  
531 probabilities.

532

533 After constructing haplotypes, a 2<sup>nd</sup> stage or refinement process remaps reads from BAM files to  
534 constructed haplotypes. This begins with the *a posteriori* probability of each base occurring at each  
535 site in each haplotype from the first stage, but relaxes the assumption that haplotypes are identical  
536 at each sample timepoint and instead uses variant co-localisation to refine haplotype predictions.  
537 Starting with the estimated frequency of each haplotype in a sample, haplotypes are optimised by  
538 probabilistically assigning reads to the various haplotypes. Reads are then reassigned iteratively until  
539 haplotype frequencies converge. The number of haplotypes either increases or decreases as a result  
540 of combination or division according to AIC scores, in order to present the most accurate  
541 representation of viral populations at each timepoint.

542

543 Whole-genome nucleotide diversity was calculated from BAM files using an in-house script  
544 (<https://github.com/ucl-pathgenomics/NucleotideDiversity>). Briefly diversity is calculated by fitting  
545 all observed variant frequencies to either a beta distribution or four-dimensional Dirichlet  
546 distribution plus delta function (representing invariant sites). These parameters were optimised by  
547 maximum log likelihood.

548

549 Maximum-likelihood phylogenetic trees and ancestral reconstruction were performed using IQTree2  
550 v2.1.3<sup>69</sup> and a GTR+F+I model with 1000 ultrafast bootstrap replicates<sup>70</sup>. All trees were visualised  
551 with Figtree v.1.4.4 (<http://tree.bio.ed.ac.uk/software/figtree/>), rooted on the AF411967.3  
552 reference sequence, and nodes arranged in descending order. Phylogenies were manipulated and  
553 annotated using ggtrree v2.2.4.

554

555 Additionally, as a sensitivity analysis, clique-snv<sup>71</sup> was used to infer a second set of haplotypes using  
556 the following flags: -m snv-illumina -fdf extended4 -threads 20 -cm accurate. This was to determine  
557 concordance of drug resistance mutation calls within haplotypes.

558

559 **Multi Dimension Scaling (MDS) Plots**

560 Pairwise distances between these consensus sequences were calculated using the `dist.dna()`  
561 package, with a TN93 nucleotide-nucleotide substitution matrix and with pairwise deletion  
562 implemented in the R package `Ape` v.5.4. Non-metric Multi-dimensional scaling (MDS) was  
563 implemented using the `metaMDS()` function in the R package, `vegan` v2.5.7. MDS is a method to  
564 attempt to simplify high dimensional data into a simpler representation of reducing dimensionality  
565 whilst retaining most of the variation relationships between points. We find that like network trees,  
566 non-metric MDS better represents the true relative distances between sequences, whereas  
567 eigenvector methods are less reliable in this sense. In a genomics context we can apply  
568 dimensionality reduction on pairwise distance matrices, where each dimension is a sequence with  
569 data points of  $n-1$  sequences pairwise distance. The process was repeated with whole genome  
570 haplotype sequences.

571

### 572 **Linkage Disequilibrium & Recombination**

573 Starting with a sequence alignment we determined the pairwise LD  $r^2$  associations for all variable  
574 sites using `WeightedLD`<sup>72</sup> without weighting. This method allowed us to exclude sites with any  
575 insertions or ambiguous characters easily where we used the option `--min-acgt 0.99` and `--min-`  
576 `variability 0.05`. The pairwise  $R^2$  values were then binned per 200bp comparison distance blocks  
577 along the genome and the mean  $R^2$  value were taken and represented graphically to assess LD  
578 decay. This analysis was run for the three patients taken forward for in-depth analysis and run using  
579 an alignment of all their timepoint samples. Graphics were generated using `Rv4.04`.

580

581 We first performed an analysis for detecting individual recombination events in individual genome  
582 sequences using the `RDP`, `GENECONV`, `BOOTSCAN`, `MAXCHI`, `CHIMAERA`, `SISCAN`, and `3SEQ` methods  
583 implemented in `RDP5`<sup>73</sup> with default settings. Putative breakpoint sites were identified and manually  
584 checked and adjusted if necessary using the `BURT` method with the `MAXCHI` matrix and `LARD` two  
585 breakpoint scan methods. Final recombination breakpoint sites were confirmed if at least three or  
586 more methods supported the existence of the recombination breakpoint.

587

### 588 **Funding**

589 SAK is supported by the Bill and Melinda Gates Foundation: OPP1175094. RKG is supported by  
590 Wellcome Trust Senior Fellowship in Clinical Science: WT108082AIA. OC is supported by a PhD  
591 studentship/UKRI MRC grant: MR/N013867/1. DPM is funded by The Wellcome Trust  
592 (222574/Z/21/Z).

593

594 **Competing Interests**

595 RKG has received ad hoc consulting fees from Gilead, ViiV and UMOVIS Lab.

596

597 **Author Contributions**

598 Conceptualization: S.A.K, D.P, R.K.G., R.G; Preparation of genomic data: S.A.K, A.D, O.J.C, W.S;

599 Recombination Analysis: S.A.K, O.J.C, D.M; Haplotype Reconstruction: S.A.K, O.J.C, R.G, W.S; writing

600 - original draft preparation, S.A.K, O.J.C, R.K.G; writing - review and editing: all authors.

601

602 **Data Availability Statement**

603 All bam files used to undertake analyses have been deposited on the SRA database with the

604 following accession numbers SRR15510046 - SRR15510072.

605

606 **Code Availability Statement**

607 Custom code used to produce figures and graphs can be found at: [https://github.com/Steven-](https://github.com/Steven-Kemp/21-2_hiv_tasp/tree/main/scripts)

608 [Kemp/21-2\\_hiv\\_tasp/tree/main/scripts](https://github.com/Steven-Kemp/21-2_hiv_tasp/tree/main/scripts).

609

610 **Acknowledgements**

611 The TasP trial was sponsored by the French National Agency for AIDS and Viral Hepatitis Research

612 (ANRS; grant number, 2011-375), and funded by the ANRS, the Deutsche Gesellschaft für

613 Internationale Zusammenarbeit (GIZ; grant number, 81151938), and the Bill & Melinda Gates

614 Foundation through the 3ie Initiative. This trial was supported by Merck and Gilead Sciences, which

615 provided the Atripla drug supply. The Africa Health Research Institute, (previously Africa Centre for

616 Population Health, University of KwaZulu-Natal, South Africa) receives core funding from the

617 Wellcome Trust, which provided the platform for the population-based and clinic-based research at

618 the centre. We thank Alpha Diallo and Severine Gibowski at the ANRS for pharmacovigilance

619 support, and Jean-François Delfraissy (director of ANRS). We thank the study volunteers for allowing

620 us into their homes and participating in this trial, and the KwaZulu-Natal Provincial and the National

621 Department of Health of South Africa for their support of this study. We thank staff of the Africa

622 Health Research Institute for the trial implementation and analysis of data, including those who did

623 the fieldwork, provided clinical care, developed and maintained the database, entered the data, and

624 verified data quality.

625

626 **References**

627 1 Abrahams, M. R. *et al.* Quantitating the multiplicity of infection with human  
628 immunodeficiency virus type 1 subtype C reveals a non-poisson distribution of transmitted  
629 variants. *J Virol* **83**, 3556-3567, doi:10.1128/JVI.02132-08 (2009).

630 2 Zanini, F., Puller, V., Brodin, J., Albert, J. & Neher, R. A. In vivo mutation rates and the  
631 landscape of fitness costs of HIV-1. *Virus Evol* **3**, vex003, doi:10.1093/ve/vex003 (2017).

632 3 Salemi, M. The intra-host evolutionary and population dynamics of human  
633 immunodeficiency virus type 1: a phylogenetic perspective. *Infect Dis Rep* **5**, e3,  
634 doi:10.4081/idr.2013.s1.e3 (2013).

635 4 Lemey, P., Rambaut, A. & Pybus, O. G. HIV evolutionary dynamics within and among hosts.  
636 *Aids Reviews* **8**, 125-140 (2006).

637 5 Collier, D. A., Monit, C. & Gupta, R. K. The Impact of HIV-1 Drug Escape on the Global  
638 Treatment Landscape. *Cell host & microbe* **26**, 48-60, doi:10.1016/j.chom.2019.06.010  
639 (2019).

640 6 Biebricher, C. K. & Eigen, M. What is a quasispecies? *Curr Top Microbiol Immunol* **299**, 1-31,  
641 doi:10.1007/3-540-26397-7\_1 (2006).

642 7 Wilke, C. O. Quasispecies theory in the context of population genetics. *BMC Evol Biol* **5**, 44,  
643 doi:10.1186/1471-2148-5-44 (2005).

644 8 Luring, A. S. & Andino, R. Quasispecies theory and the behavior of RNA viruses. *PLoS*  
645 *Pathog* **6**, e1001005, doi:10.1371/journal.ppat.1001005 (2010).

646 9 Zanini, F. *et al.* Population genomics of intrapatient HIV-1 evolution. *Elife* **4**, e11282,  
647 doi:10.7554/eLife.11282 (2015).

648 10 Lythgoe, K. A. & Fraser, C. New insights into the evolutionary rate of HIV-1 at the within-host  
649 and epidemiological levels. *Proceedings of the Royal Society B-Biological Sciences* **279**, 3367-  
650 3375, doi:10.1098/rspb.2012.0595 (2012).

651 11 Hedskog, C. *et al.* Dynamics of HIV-1 Quasispecies during Antiviral Treatment Dissected  
652 Using Ultra-Deep Pyrosequencing. *PloS one* **5**, e11345, doi:ARTN e11345  
653 10.1371/journal.pone.0011345 (2010).

654 12 Shankarappa, R. *et al.* Consistent viral evolutionary changes associated with the progression  
655 of human immunodeficiency virus type 1 infection. *J Virol* **73**, 10489-10502,  
656 doi:10.1128/JVI.73.12.10489-10502.1999 (1999).

657 13 Masikini, P. & Mpondo, B. C. HIV drug resistance mutations following poor adherence in HIV-  
658 infected patient: a case report. *Clin Case Rep* **3**, 353-356, doi:10.1002/ccr3.254 (2015).

659 14 TenoRes Study, G. Global epidemiology of drug resistance after failure of WHO  
660 recommended first-line regimens for adult HIV-1 infection: a multicentre retrospective  
661 cohort study. *Lancet Infect Dis* **16**, 565-575, doi:10.1016/S1473-3099(15)00536-8 (2016).

662 15 Collier, D. *et al.* Virological Outcomes of Second-line Protease Inhibitor-Based Treatment for  
663 Human Immunodeficiency Virus Type 1 in a High-Prevalence Rural South African Setting: A  
664 Competing-Risks Prospective Cohort Analysis. *Clinical infectious diseases : an official*  
665 *publication of the Infectious Diseases Society of America* **64**, 1006-1016,  
666 doi:10.1093/cid/cix015 (2017).

667 16 Giandhari, J. *et al.* Genetic Changes in HIV-1 Gag-Protease Associated with Protease  
668 Inhibitor-Based Therapy Failure in Pediatric Patients. *AIDS Res Hum Retroviruses* **31**, 776-  
669 782, doi:10.1089/AID.2014.0349 (2015).

670 17 Kelly Pillay, S., Singh, U., Singh, A., Gordon, M. & Ndungu, T. Gag drug resistance mutations  
671 in HIV-1 subtype C patients, failing a protease inhibitor inclusive treatment regimen, with  
672 detectable lopinavir levels. *Journal of the International AIDS Society* **17**, 19784 (2014).

673 18 Sutherland, K. A. *et al.* Evidence for Reduced Drug Susceptibility without Emergence of  
674 Major Protease Mutations following Protease Inhibitor Monotherapy Failure in the SARA  
675 Trial. *PloS one* **10**, e0137834, doi:10.1371/journal.pone.0137834 (2015).

- 676 19 Sutherland, K. A. *et al.* Phenotypic characterization of virological failure following  
677 lopinavir/ritonavir monotherapy using full-length Gag-protease genes. *The Journal of*  
678 *antimicrobial chemotherapy* **69**, 3340-3348, doi:10.1093/jac/dku296 (2014).
- 679 20 Sutherland, K. A. *et al.* Gag-Protease Sequence Evolution Following Protease Inhibitor  
680 Monotherapy Treatment Failure in HIV-1 Viruses Circulating in East Africa. *AIDS research and*  
681 *human retroviruses* **31**, 1032-1037, doi:10.1089/aid.2015.0138 (2015).
- 682 21 Day, C. L. *et al.* Proliferative capacity of epitope-specific CD8 T-cell responses is inversely  
683 related to viral load in chronic human immunodeficiency virus type 1 infection. *Journal of*  
684 *virology* **81**, 434-438, doi:10.1128/JVI.01754-06 (2007).
- 685 22 Blanch-Lombarte, O. *et al.* HIV-1 Gag mutations alone are sufficient to reduce darunavir  
686 susceptibility during virological failure to boosted PI therapy. *The Journal of antimicrobial*  
687 *chemotherapy* **75**, 2535-2546, doi:10.1093/jac/dkaa228 (2020).
- 688 23 Feder, A. F. *et al.* More effective drugs lead to harder selective sweeps in the evolution of  
689 drug resistance in HIV-1. *Elife* **5**, e10670, doi:10.7554/eLife.10670 (2016).
- 690 24 Harris, R. B., Sackman, A. & Jensen, J. D. On the unfounded enthusiasm for soft selective  
691 sweeps II: Examining recent evidence from humans, flies, and viruses. *PLoS genetics* **14**,  
692 e1007859, doi:10.1371/journal.pgen.1007859 (2018).
- 693 25 Dam, E. *et al.* Gag mutations strongly contribute to HIV-1 resistance to protease inhibitors in  
694 highly drug-experienced patients besides compensating for fitness loss. *PLoS pathogens* **5**,  
695 e1000345 (2009).
- 696 26 Cong, M. E., Heneine, W. & Garcia-Lerma, J. G. The fitness cost of mutations associated with  
697 human immunodeficiency virus type 1 drug resistance is modulated by mutational  
698 interactions. *Journal of Virology* **81**, 3037-3041, doi:10.1128/Jvi.02712-06 (2007).
- 699 27 Iwuji, C. C. *et al.* Evaluation of the impact of immediate versus WHO recommendations-  
700 guided antiretroviral therapy initiation on HIV incidence: the ANRS 12249 TasP (Treatment  
701 as Prevention) trial in Hlabisa sub-district, KwaZulu-Natal, South Africa: study protocol for a  
702 cluster randomised controlled trial. *Trials* **14**, 230, doi:10.1186/1745-6215-14-230 (2013).
- 703 28 World Health Organization. *Consolidated guidelines on the use of antiretroviral drugs for*  
704 *treating and preventing HIV infection: recommendations for a public health approach.*  
705 (World Health Organization, 2016).
- 706 29 Carlson, J. M. *et al.* HIV transmission. Selection bias at the heterosexual HIV-1 transmission  
707 bottleneck. *Science (New York, N.Y.)* **345**, 1254031-1254031, doi:10.1126/science.1254031  
708 (2014).
- 709 30 Cox, M. A. & Cox, T. F. in *Handbook of data visualization* 315-347 (Springer, 2008).
- 710 31 Pang, J. *et al.* Haplotype assignment of longitudinal viral deep-sequencing data using co-  
711 variation of variant frequencies. *bioRxiv*, 444877, doi:10.1101/444877 (2020).
- 712 32 Stephens, M. & Scheet, P. Accounting for Decay of Linkage Disequilibrium in Haplotype  
713 Inference and Missing-Data Imputation. *The American Journal of Human Genetics* **76**, 449-  
714 462, doi:<https://doi.org/10.1086/428594> (2005).
- 715 33 Song, H. *et al.* Tracking HIV-1 recombination to resolve its contribution to HIV-1 evolution in  
716 natural infection. *Nature Communications* **9**, 1928, doi:10.1038/s41467-018-04217-5 (2018).
- 717 34 Datir, R. *et al.* In Vivo Emergence of a Novel Protease Inhibitor Resistance Signature in HIV-1  
718 Matrix. *mBio* **11**, e02036-02020, doi:10.1128/mBio.02036-20 (2020).
- 719 35 Kletenkov, K. *et al.* Role of Gag mutations in PI resistance in the Swiss HIV cohort study:  
720 bystanders or contributors? *J Antimicrob Chemother* **72**, 866-875, doi:10.1093/jac/dkw493  
721 (2017).
- 722 36 Rabi, S. A. *et al.* Multi-step inhibition explains HIV-1 protease inhibitor pharmacodynamics  
723 and resistance. *The Journal of clinical investigation* **123**, 3848-3860, doi:10.1172/JCI67399  
724 (2013).
- 725 37 Manasa, J. *et al.* Evolution of gag and gp41 in Patients Receiving Ritonavir-Boosted Protease  
726 Inhibitors. *Sci Rep* **7**, 11559, doi:10.1038/s41598-017-11893-8 (2017).

- 727 38 Datir, R., El Bouzidi, K., Dakum, P., Ndembi, N. & Gupta, R. K. Baseline PI susceptibility by  
728 HIV-1 Gag-protease phenotyping and subsequent virological suppression with PI-based  
729 second-line ART in Nigeria. *The Journal of antimicrobial chemotherapy* **74**, 1402-1407,  
730 doi:10.1093/jac/dkz005 (2019).
- 731 39 Parikh, U. M., Zelina, S., Sluis-Cremer, N. & Mellors, J. W. Molecular mechanisms of  
732 bidirectional antagonism between K65R and thymidine analog mutations in HIV-1 reverse  
733 transcriptase. *Aids* **21**, 1405-1414 (2007).
- 734 40 Parikh, U. M., Bachelier, L., Koontz, D. & Mellors, J. W. The K65R mutation in human  
735 immunodeficiency virus type 1 reverse transcriptase exhibits bidirectional phenotypic  
736 antagonism with thymidine analog mutations. *Journal of virology* **80**, 4971-4977 (2006).
- 737 41 Parikh, U. M., Barnas, D. C., Faruki, H. & Mellors, J. W. Antagonism between the HIV-1  
738 reverse-transcriptase mutation K65R and thymidine-analogue mutations at the genomic  
739 level. *The Journal of infectious diseases* **194**, 651-660 (2006).
- 740 42 Department of Health. 2019 ART Clinical Guidelines for the Management of HIV in Adults,  
741 Pregnancy, Adolescents, Children, Infants and Neonates. (Republic of South Africa National  
742 Department of Health, 2019).
- 743 43 UNAIDS. *Global HIV & AIDS statistics — 2020 fact sheet*,  
744 <<https://www.unaids.org/en/resources/fact-sheet>> (2020), Accessed 3rd March 2021.
- 745 44 Gupta, R. K. *et al.* HIV-1 drug resistance before initiation or re-initiation of first-line  
746 antiretroviral therapy in low-income and middle-income countries: a systematic review and  
747 meta-regression analysis. *Lancet Infect Dis* **18**, 346-355, doi:10.1016/S1473-3099(17)30702-  
748 8 (2018).
- 749 45 Gupta, R. K. *et al.* Global trends in antiretroviral resistance in treatment-naive individuals  
750 with HIV after rollout of antiretroviral treatment in resource-limited settings: a global  
751 collaborative study and meta-regression analysis. *Lancet* **380**, 1250-1258,  
752 doi:10.1016/S0140-6736(12)61038-1 (2012).
- 753 46 Gregson, J. *et al.* Occult HIV-1 drug resistance to thymidine analogues following failure of  
754 first-line tenofovir combined with a cytosine analogue and nevirapine or efavirenz in sub  
755 Saharan Africa: a retrospective multi-centre cohort study. *Lancet Infect Dis*,  
756 doi:10.1016/S1473-3099(16)30469-8 (2017).
- 757 47 WHO, C. Global Fund. HIV drug resistance report. 2017. *World Health Organisation* (2017).
- 758 48 Stefic, K., Bouvin-Pley, M., Braibant, M. & Barin, F. Impact of HIV-1 Diversity on Its Sensitivity  
759 to Neutralization. *Vaccines (Basel)* **7**, 74, doi:10.3390/vaccines7030074 (2019).
- 760 49 Pancera, M. *et al.* Structure and immune recognition of trimeric pre-fusion HIV-1 Env.  
761 *Nature* **514**, 455-461, doi:10.1038/nature13808 (2014).
- 762 50 Yu, F. *et al.* The Transmission and Evolution of HIV-1 Quasispecies within One Couple: a  
763 Follow-up Study based on Next-Generation Sequencing. *Scientific reports* **8**, 1404,  
764 doi:10.1038/s41598-018-19783-3 (2018).
- 765 51 Pang, J. *et al.* Mixed cytomegalovirus genotypes in HIV-positive mothers show  
766 compartmentalization and distinct patterns of transmission to infants. *Elife* **9**, e63199,  
767 doi:10.7554/eLife.63199 (2020).
- 768 52 Boshier, F. A. T. *et al.* Remdesivir induced viral RNA and subgenomic RNA suppression, and  
769 evolution of viral variants in SARS-CoV-2 infected patients. *medRxiv*,  
770 2020.2011.2018.20230599, doi:10.1101/2020.11.18.20230599 (2020).
- 771 53 Li, J. Z. *et al.* Incomplete adherence to antiretroviral therapy is associated with higher levels  
772 of residual HIV-1 viremia. *AIDS* **28**, 181-186, doi:10.1097/QAD.000000000000123 (2014).
- 773 54 Parry, C. M. *et al.* Three residues in HIV-1 matrix contribute to protease inhibitor  
774 susceptibility and replication capacity. *Antimicrobial agents and chemotherapy* **55**, 1106-  
775 1113, doi:10.1128/AAC.01228-10 (2011).
- 776 55 Neher, R. A. & Leitner, T. Recombination rate and selection strength in HIV intra-patient  
777 evolution. *PLoS Comput Biol* **6**, e1000660, doi:10.1371/journal.pcbi.1000660 (2010).

- 778 56 El Bouzidi, K. *et al.* High prevalence of integrase mutation L74I in West African HIV-1  
779 subtypes prior to integrase inhibitor treatment. *J Antimicrob Chemother* **75**, 1575-1579,  
780 doi:10.1093/jac/dkaa033 (2020).
- 781 57 Derache, A. *et al.* Predicted antiviral activity of tenofovir versus abacavir in combination with  
782 a cytosine analogue and the integrase inhibitor dolutegravir in HIV-1-infected South African  
783 patients initiating or failing first-line ART. *The Journal of antimicrobial chemotherapy*,  
784 doi:10.1093/jac/dky428 (2018).
- 785 58 Siedner, M. J. *et al.* Reduced efficacy of HIV-1 integrase inhibitors in patients with drug  
786 resistance mutations in reverse transcriptase. *Nat Commun* **11**, 5922, doi:10.1038/s41467-  
787 020-19801-x (2020).
- 788 59 Iwuji, C. *et al.* Universal test and treat is not associated with sub-optimal antiretroviral  
789 therapy adherence in rural South Africa: the ANRS 12249 TasP trial. *J Int AIDS Soc* **21**,  
790 e25112, doi:10.1002/jia2.25112 (2018).
- 791 60 Derache, A. *et al.* Impact of Next-generation Sequencing Defined Human Immunodeficiency  
792 Virus Pretreatment Drug Resistance on Virological Outcomes in the ANRS 12249 Treatment-  
793 as-Prevention Trial. *Clinical infectious diseases : an official publication of the Infectious*  
794 *Diseases Society of America* **69**, 207-214, doi:10.1093/cid/ciy881 (2019).
- 795 61 Gall, A. *et al.* Universal amplification, next-generation sequencing, and assembly of HIV-1  
796 genomes. *Journal of clinical microbiology* **50**, 3838-3844, doi:10.1128/JCM.01516-12 (2012).
- 797 62 Martin, M. J. E. j. Cutadapt removes adapter sequences from high-throughput sequencing  
798 reads. **17**, pp. 10-12 (2011).
- 799 63 Li, H. Minimap2: pairwise alignment for nucleotide sequences. *Bioinformatics (Oxford,*  
800 *England)* **34**, 3094-3100, doi:10.1093/bioinformatics/bty191 (2018).
- 801 64 Shafer, R. W. Rationale and uses of a public HIV drug-resistance database. *The Journal of*  
802 *infectious diseases* **194 Suppl 1**, S51-58, doi:10.1086/505356 (2006).
- 803 65 Okonechnikov, K., Conesa, A. & Garcia-Alcalde, F. Qualimap 2: advanced multi-sample  
804 quality control for high-throughput sequencing data. *Bioinformatics (Oxford, England)* **32**,  
805 292-294, doi:10.1093/bioinformatics/btv566 (2016).
- 806 66 Koboldt, D. C. *et al.* VarScan 2: somatic mutation and copy number alteration discovery in  
807 cancer by exome sequencing. *Genome Res* **22**, 568-576, doi:10.1101/gr.129684.111 (2012).
- 808 67 Charles, O. J., Venturini, C. & Breuer, J. cmvdrng - An R package for Human Cytomegalovirus  
809 antiviral Drug Resistance Genotyping. *bioRxiv*, 2020.2005.2015.097907,  
810 doi:10.1101/2020.05.15.097907 (2020).
- 811 68 Perrier, M. *et al.* Evaluation of different analysis pipelines for the detection of HIV-1 minority  
812 resistant variants. *PloS one* **13**, e0198334, doi:10.1371/journal.pone.0198334 (2018).
- 813 69 Minh, B. Q. *et al.* IQ-TREE 2: New models and efficient methods for phylogenetic inference in  
814 the genomic era. *bioRxiv*, 849372, doi:10.1101/849372 (2019).
- 815 70 Minh, B. Q., Nguyen, M. A. & von Haeseler, A. Ultrafast approximation for phylogenetic  
816 bootstrap. *Mol Biol Evol* **30**, 1188-1195, doi:10.1093/molbev/mst024 (2013).
- 817 71 Knyazev, S. *et al.* Cliquesnv: Scalable reconstruction of intra-host viral populations from ngs  
818 reads. *bioRxiv*. (2018).
- 819 72 Charles, O. J., Roberts, J., Breuer, J. & Goldstein, R. A. WeightedLD: The Application of  
820 Sequence Weights to Linkage Disequilibrium. *bioRxiv*, 2021.2006.2004.447093,  
821 doi:10.1101/2021.06.04.447093 (2021).
- 822 73 Martin, D. P. *et al.* RDP5: a computer program for analyzing recombination in, and removing  
823 signals of recombination from, nucleotide sequence datasets. *Virus Evol* **7**, veaa087,  
824 doi:10.1093/ve/veaa087 (2021).

827 **Table 1.** Regimens and viral load at final timepoint for all patients. Patients initiated and maintained  
 828 1<sup>st</sup>-line regimens for between 1-10 years before being switched to 2<sup>nd</sup>-line regimens as part of the  
 829 TasP trial. Eight of the nine patients were failing 2<sup>nd</sup>-line regimens at the final timepoint.

830

| Patient | No. of timepoints | 1st-line regimen | Time since initiation of 1 <sup>st</sup> -line treatment (yrs.) | 2 <sup>nd</sup> -line regimen | Viral Load at final timepoint (copies/ml) |
|---------|-------------------|------------------|-----------------------------------------------------------------|-------------------------------|-------------------------------------------|
| 15664   | 6                 | d4T, 3TC, FTC    | 6.2                                                             | LPV/r, TDF, FTC               | 28655                                     |
| 16207   | 5                 | d4T, 3TC, NVP    | 5.9                                                             | LPV/r, TDF, FTC               | 56660                                     |
| 22763   | 8                 | d4T, 3TC, EFV    | 6.2                                                             | LPV/r, TDF, 3TC               | 15017                                     |
| 22828   | 6                 | d4T, 3TC, NVP    | 6.4                                                             | LPV/r, TDF, 3TC/FTC           | 947                                       |
| 26892   | 7                 | d4T, 3TC, EFV    | 6                                                               | LPV/r, TDF, FTC               | 12221                                     |
| 28545   | 5                 | TDF, FTC, EFV    | 1.3                                                             | LPV/r, AZT, 3TC               | 12964                                     |
| 29447   | 4                 | TDF, FTC, EFV    | 2.8                                                             | LPV/r, TDF, FTC               | 64362                                     |
| 47939   | 3                 | d4T, 3TC, EFV    | 10.1                                                            | LPV/r, AZT, 3TC/FTC           | 6328                                      |

831 **NRTI:** Stavudine, d4T; Lamivudine, 3TC; Tenofovir, TDF; Emtricitabine, FTC; Zidovudine, AZT. **NNRTI:**  
 832 Efavirenz, EFV; Nevirapine, NVP. **PI:** Lopinavir/ritonavir, LPV/r.

833

834

835 **Legends**

836 **Figure 1. Sequence divergence for eight Patients under non-suppressive ART.** These data were for  
 837 SNPs detected by Illumina NGS at <2% abundance. Sites had coverage of at least 10 reads. In both **a)**  
 838 synonymous and **b)** non-synonymous mutations, there was idiosyncratic change in number of SNPs  
 839 relative to the reference strain over time. **C) Mixed effects linear model of divergence from the**  
 840 **baseline timepoint and D) consensus C subtype.**

841

842 **Figure 2. Multi-dimensional scaling showing A) clustering of HIV whole genomes from consensus**  
 843 **sequences with high intra-Patient diversity.** Multi-dimensional scaling (MDS) were created by  
 844 determining all pairwise distance comparisons under a TN93 substitution model, coloured by  
 845 Patient. Axis are MDS-1 and MDS-2. **B) Maximum likelihood phylogeny of constructed viral**  
 846 **haplotypes for all Patients.** The phylogeny was rooted on the AF411967 clade C reference genome.  
 847 Reconstructed haplotypes were genetically diverse and did not typically cluster by timepoint.

848

849 **Figure 3A) Pairwise linkage disequilibrium decays rapidly with increasing distance between SNPs.**  
 850 Lines represent patterns of LD for each patient examined in-depth. There was a constant decrease in  
 851 linkage disequilibrium over the first 800bp. **B) Putative recombination breakpoints and drug-**  
 852 **resistance associated mutations of all longitudinal consensus sequences belonging to three**  
 853 **Patients: 15664, 16207 and 22763.** All sequences were coloured uniquely; perceived recombination  
 854 events supported by 4 or more methods implemented in RDP5 are highlighted with a red border and



855 italic text to show the major parent and recombinant portion of the sequence. Drug-resistance  
856 associated mutations are indicated with a red arrow, relative to the key at the bottom of the image.  
857 For ease of distinguishment, the K65R mutations is indicated with a blue arrow.

858

859 **Figure 4. Drug regimen, adherence and viral dynamics within Patient 15664. a) Viral load and drug**  
860 **levels.** At successive timepoints drug regimen was noted and plasma drug concentration measured  
861 by HPLC (nmol/l). The Patient was characterised by multiple partial suppression (<750 copies/ml, 16  
862 months; <250 copies/ml, 22 months) and rebound events (red dotted line) and poor adherence to  
863 the drug regimen. **b) Drug resistance and non-drug resistance associated non-synonymous**  
864 **mutation frequencies by Illumina NGS.** The Patient had large population shifts between timepoints  
865 1-2, consistent with a hard selective sweep, coincident with the shift from 1<sup>st</sup>-line regimen to 2<sup>nd</sup>-  
866 line. **c) Synonymous mutation frequencies.** All mutations with a frequency of <10% or >90% at two  
867 or more timepoints were tracked over successive timepoints. Most changes were restricted to *gag*  
868 and *pol* regions and had limited shifts in frequency i.e. between 20-60%. **d) Maximum-likelihood**  
869 **phylogeny of reconstructed haplotypes.** Haplotypes largely segregated into three major clades  
870 (labelled A-C). Majority and minority haplotypes, some carrying lamivudine resistance mutation  
871 M184V. Clades referred to in the text body are shown to the right of the heatmap.

872

873 **Figure 5. Drug regimen, adherence and viral dynamics within Patient 16207. A) Viral load and drug**  
874 **levels.** At successive timepoints regimen was noted and plasma drug concentration measured by  
875 HPLC (nmol/l). The Patient displayed ongoing viraemia and poor adherence to the prescribed drug  
876 regimen. **B) Drug resistance and non-drug resistance associated non-synonymous mutations**  
877 **frequencies.** The Patient had only one major RT mutation - K103N for the duration of the treatment  
878 period. Several antagonistic non-synonymous switches in predominantly *env* were observed  
879 between timepoints 1-4. **C) Synonymous mutation frequencies.** All mutations with a frequency of  
880 <10% or >90% at two or more timepoints were followed over successive timepoints. In contrast to  
881 non-synonymous mutations, most synonymous changes were in *pol*, indicative of linkage to the *env*  
882 coding changes. **D) Maximum-likelihood phylogeny of reconstructed haplotypes.** Haplotypes were  
883 again clearly divided into three distinct clades; each clade contained haplotypes from all timepoints,  
884 suggesting lack of hard selective sweeps and intermingling of viral haplotypes with softer sweeps.  
885 that most viral competition occurred outside of drug pressure.

886

887 **Figure 6. Drug regimen, adherence and viral dynamics of Patient 22763. A) Viral load and regimen**  
888 **adherence.** At successive timepoints the regimen was noted, and plasma drug concentration  
889 measured by HPLC (nmol/l). The Patient had therapeutic levels of drug at several timepoints (3, 5  
890 and 8), indicating variable adherence to the prescribed drug regimen. **B) Drug resistance and non-**  
891 **drug-resistance-associated non-synonymous mutation frequencies.** The Patient had numerous  
892 drug resistance mutations in dynamic flux. Between timepoints 4-7, there was a complete  
893 population shift, indicated by reciprocal competition between the RT mutations K65R and the TAMs  
894 K67N and K70R. **C) Synonymous mutations frequencies.** All mutations with a frequency of <10% or  
895 >90% at two or more timepoints were followed over successive timepoints. Several *env* mutations  
896 mimicked the non-synonymous shifts observed between timepoints 2-4, suggestive of linkage. **D)**  
897 **Maximum-likelihood phylogeny of reconstructed haplotypes.** timepoints 1-4 were found in distinct  
898 lineages. In later timepoints, from 5-8, haplotypes became more intermingled, whilst maintaining  
899 antagonism between K65R and K67N bearing viruses.

900

901 **Supplementary Figure 1.** Read depth per site for all BAM files. Any site that had coverage of <100  
902 reads (indicated as a horizontal black line) was excluded from haplotype reconstruction and  
903 reversion to consensus calculations.

904

905 **Supplementary Figure 2.** Whole-genome nucleotide diversity of longitudinal timepoints from each  
906 patient. Diversity was calculated using all information from BAM files by fitting observed variant  
907 frequencies to two distributions (a  $\beta$ -distribution and 4D Dirichlet plus  $\Delta$  function). Each dot in the  
908 scatter represents a different timepoint and highlights differences in whole-genome diversity  
909 between successive timepoints.

910

911 **Supplementary Figure 3. Maximum likelihood phylogeny of consensus sequences from all**  
912 **timepoints from all patients.** Phylogenies were rooted on a South-African origin subtype C reference  
913 genome, AF411967. Trees were inferred with a GTR model with 1000 rapid bootstrap replicates.  
914 Bootstrap values are indicated at all nodes. The phylogeny is consistent with the haplotype tree  
915 shown in **Figure 1C** indicating that haplotypes were accurate representations of sequences.

916

917 **Supplementary Figure 4. MDS scatterplot of reconstructed haplotypes.** Plots were produced by  
918 obtaining a multiple sequence alignment, calculating average pairwise distances between all pairs  
919 and then multi-dimensional scaling under a TN93 substitution matrix. Each axis represents the  
920 component scores of the most variable axis and the second-most variable axis. Haplotypes show an  
921 increased measure of diversity compared to consensus-level variants. This is due to increased  
922 resolution of potential viral quasispecies.

923

924 **Supplementary Figure 5. Patterns of SNPs at perceived recombination breakpoint locations.** In all  
925 Patients where there was recombination detected, there were distinct patterns or haplotypes  
926 observable across multiple sites. Distinct patterns were observable between recombination  
927 breakpoints, lending support to the theory that recombination between different genomes was  
928 occurring, to give rise to numerous haplotypes. In numerical terms where each number represents  
929 an individual pattern (i.e. 0, 1 or 2), Patient 15664 haplotype pattern 1, (A, Left), assumes a 011011  
930 distribution, pattern 2 (A, middle) as 0100010 and pattern 3 (A, right) as 000001. Patient 16207,  
931 pattern one (B, Left) is 010223 and pattern 2 (B, right) is 010101. Patient 22763, pattern one (C, left)  
932 is 00011211 and pattern 2 (C, right) is 00011210.

933

934 **Supplementary Figure 6. Maximum-likelihood phylogenies of reconstructed haplotypes using**  
935 **Clique-SNV.** As this method of haplotype reconstruction does not consider the longitudinal aspect of  
936 the data, haplotypes are segregated according to timepoint. DRMs are largely consistent with those  
937 inferred by HaROLD.

938

939 **Supplementary Table 1a.** Patient 15664 *gag* variant frequencies across successive timepoints. For all  
940 tables below, figures are in percentage of variant in a VCF at each timepoint.

941

942 **Supplementary Table 1b.** Patient 15664 *pol* variants.

943

944 **Supplementary Table 1C.** Patient 15664 *env* variants.

945

946 **Supplementary Table 2a.** Patient 16207 *gag* variant frequencies

947

948 **Supplementary Table 2b.** Patient 16207 *pol* variant frequencies.

949

950 **Supplementary Table 2c.** Patient 16207 *env* variant frequencies.

951

952 **Supplementary Table 3a.** Patient 22763 *gag* variant frequencies

953

954 **Supplementary Table 3b.** Patient 22763 *pol* mutations

955

956 **Supplementary Table 3c.** Patient 22763 *env* mutations

957 **Supplementary Table 2.** Results from linear mixed effects models of effect of months on divergence  
958 from founder virus.  
959

a)

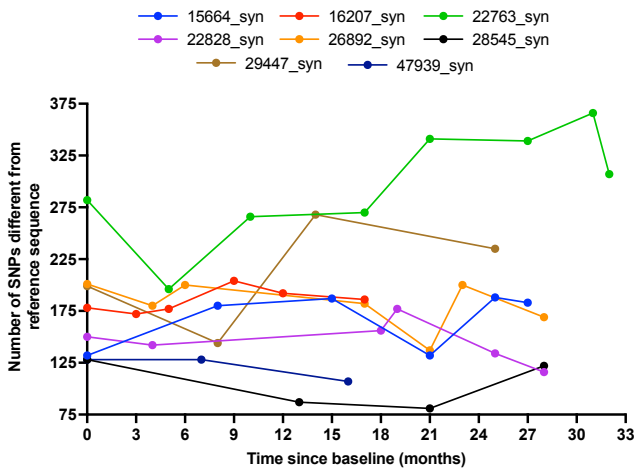

b)

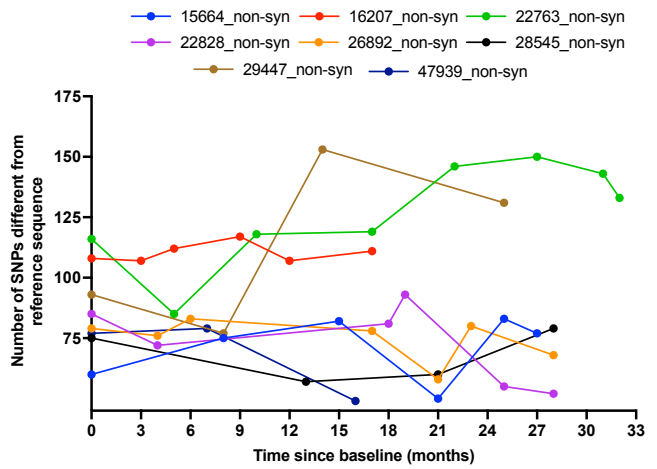

c)

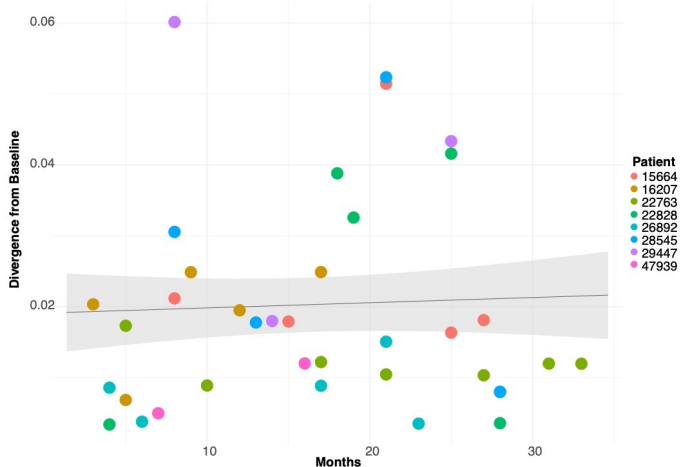

d)

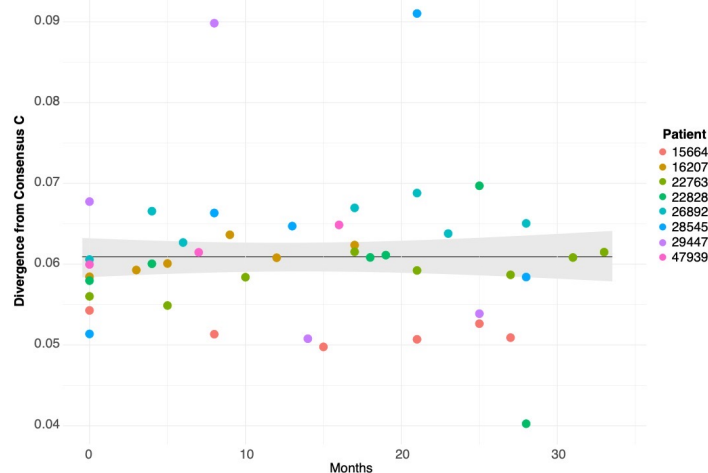

**Figure 1. Sequence divergence for eight participants under non-suppressive ART.** These data were for SNPs detected by Illumina NGS at <2% abundance. Sites had coverage of at least 10 reads. In both **a)** synonymous and **b)** non-synonymous mutations, there was idiosyncratic change in number of SNPs relative to the reference strain over time. **C)** Mixed effects linear model of divergence from the baseline timepoint and **D)** consensus C subtype.

a)

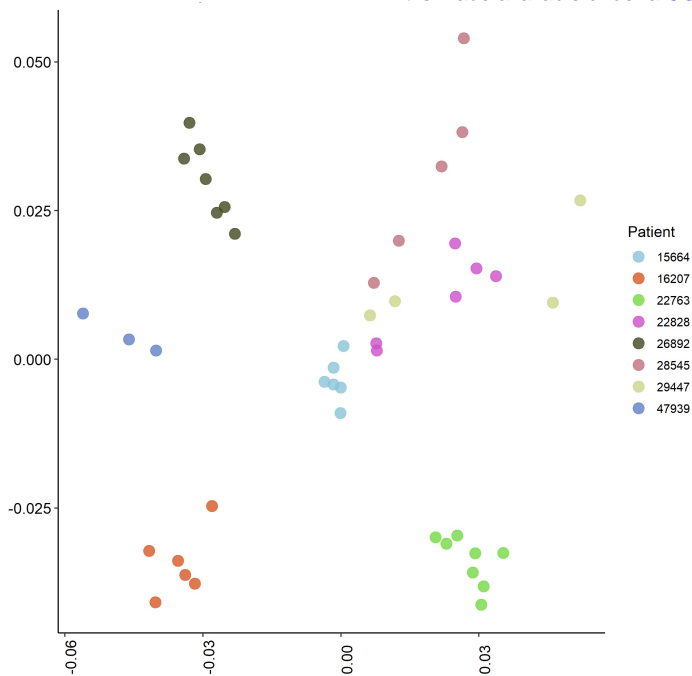

b)

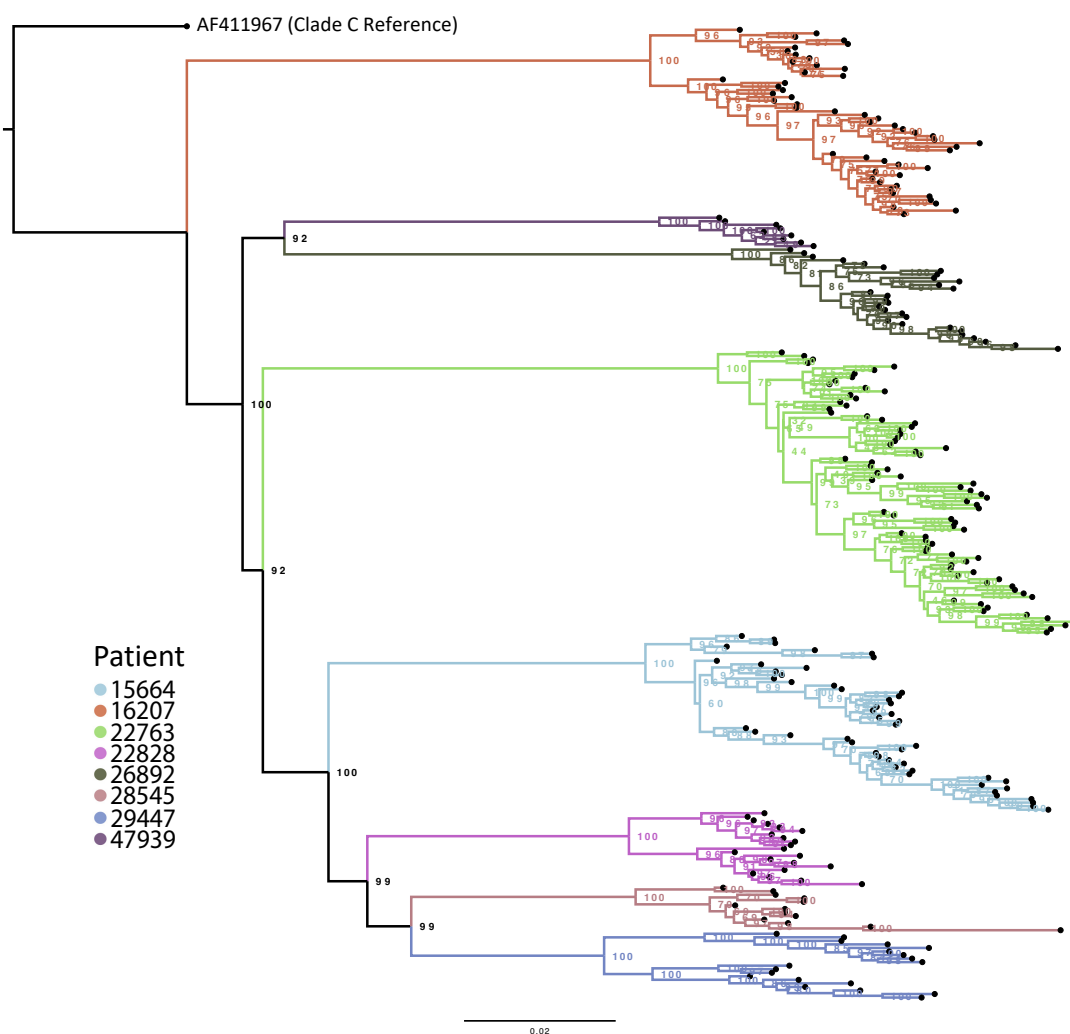

**Figure 2. Multi-dimensional scaling showing A) clustering of HIV whole genomes from consensus sequences with high intra-participant diversity.** Multi-dimensional scaling (MDS) were created by determining all pairwise distance comparisons under a TN93 substitution model, coloured by participant. Axis are MDS-1 and MDS-2. **B) Maximum likelihood phylogeny of constructed viral haplotypes for all participants.** The phylogeny was rooted on the AF411967 clade C reference genome. Reconstructed haplotypes were genetically diverse and did not typically cluster by timepoint.

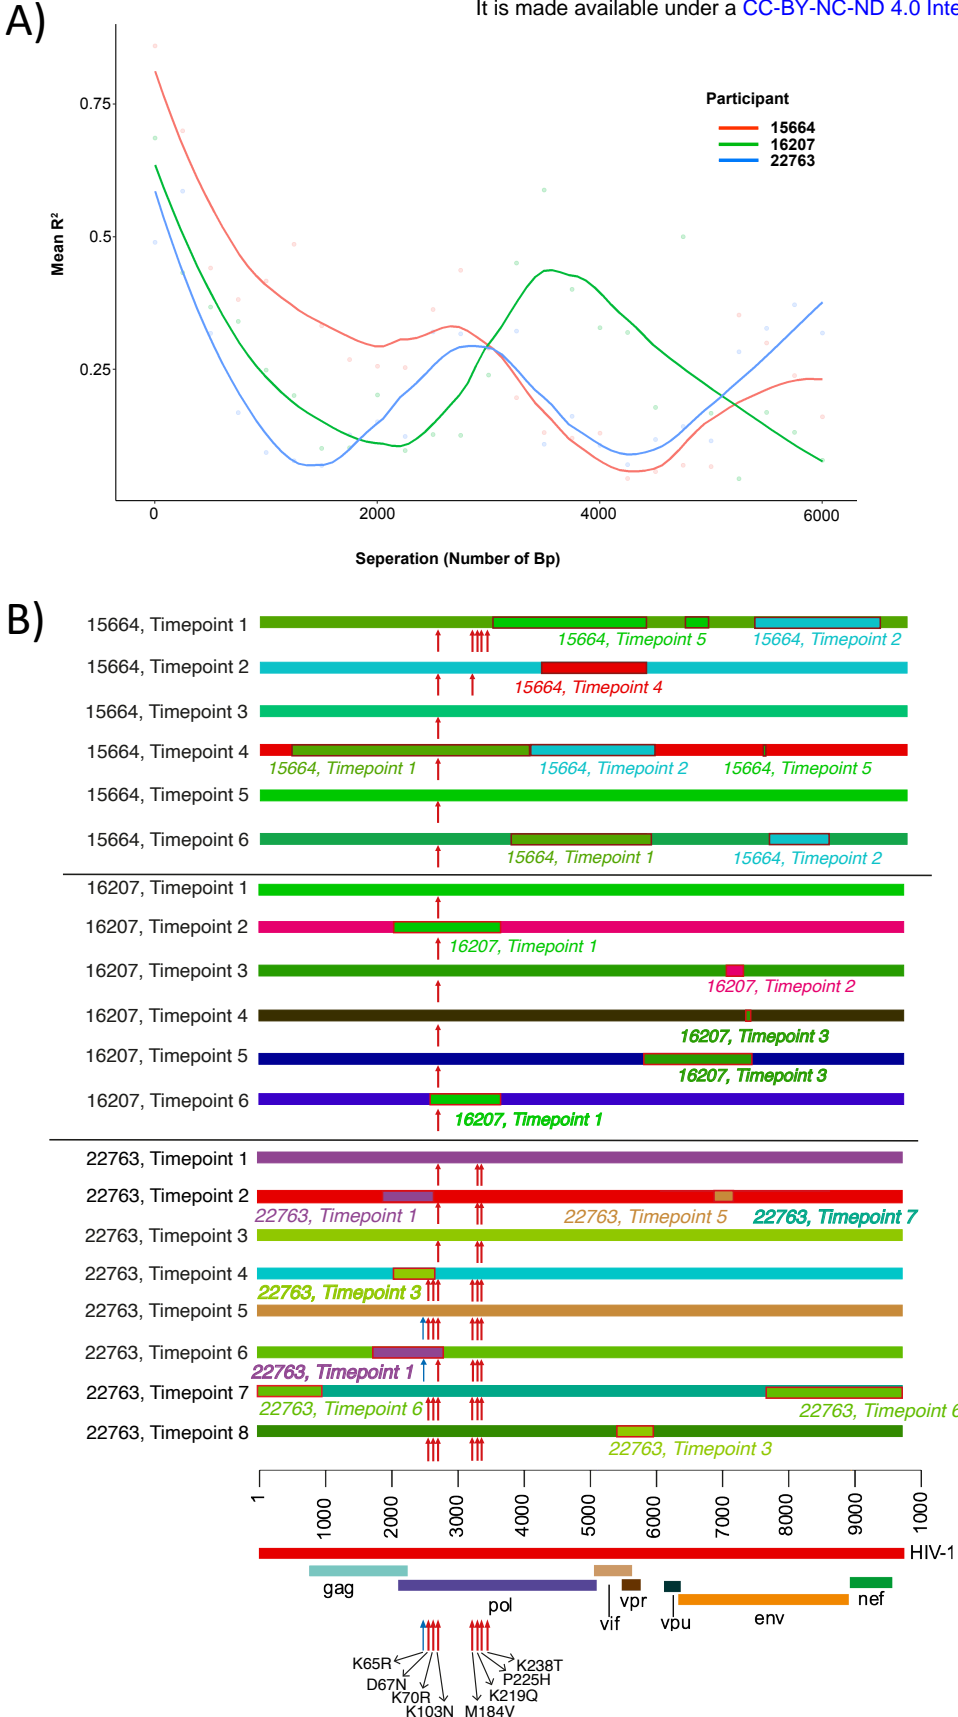

**Figure 3A) Pairwise linkage disequilibrium decays rapidly with increasing distance between SNPs.** Lines represent patterns of LD for each patient examined in-depth. There was a constant decrease in linkage disequilibrium over the first 800bp. **B) Putative recombination breakpoints and drug-resistance associated mutations of all longitudinal consensus sequences belonging to three participants: 15664, 16207 and 22763.** All sequences were coloured uniquely uniquely; perceived recombination events supported by 4 or more methods implemented in RDP5 are highlighted with a red border and italic text to show the major parent and recombinant portion of the sequence. Drug-resistance associated mutations are indicated with a red arrow, relative to the key at the bottom of the image. For ease of distinguishment, the K65R mutations is indicated with a blue arrow.

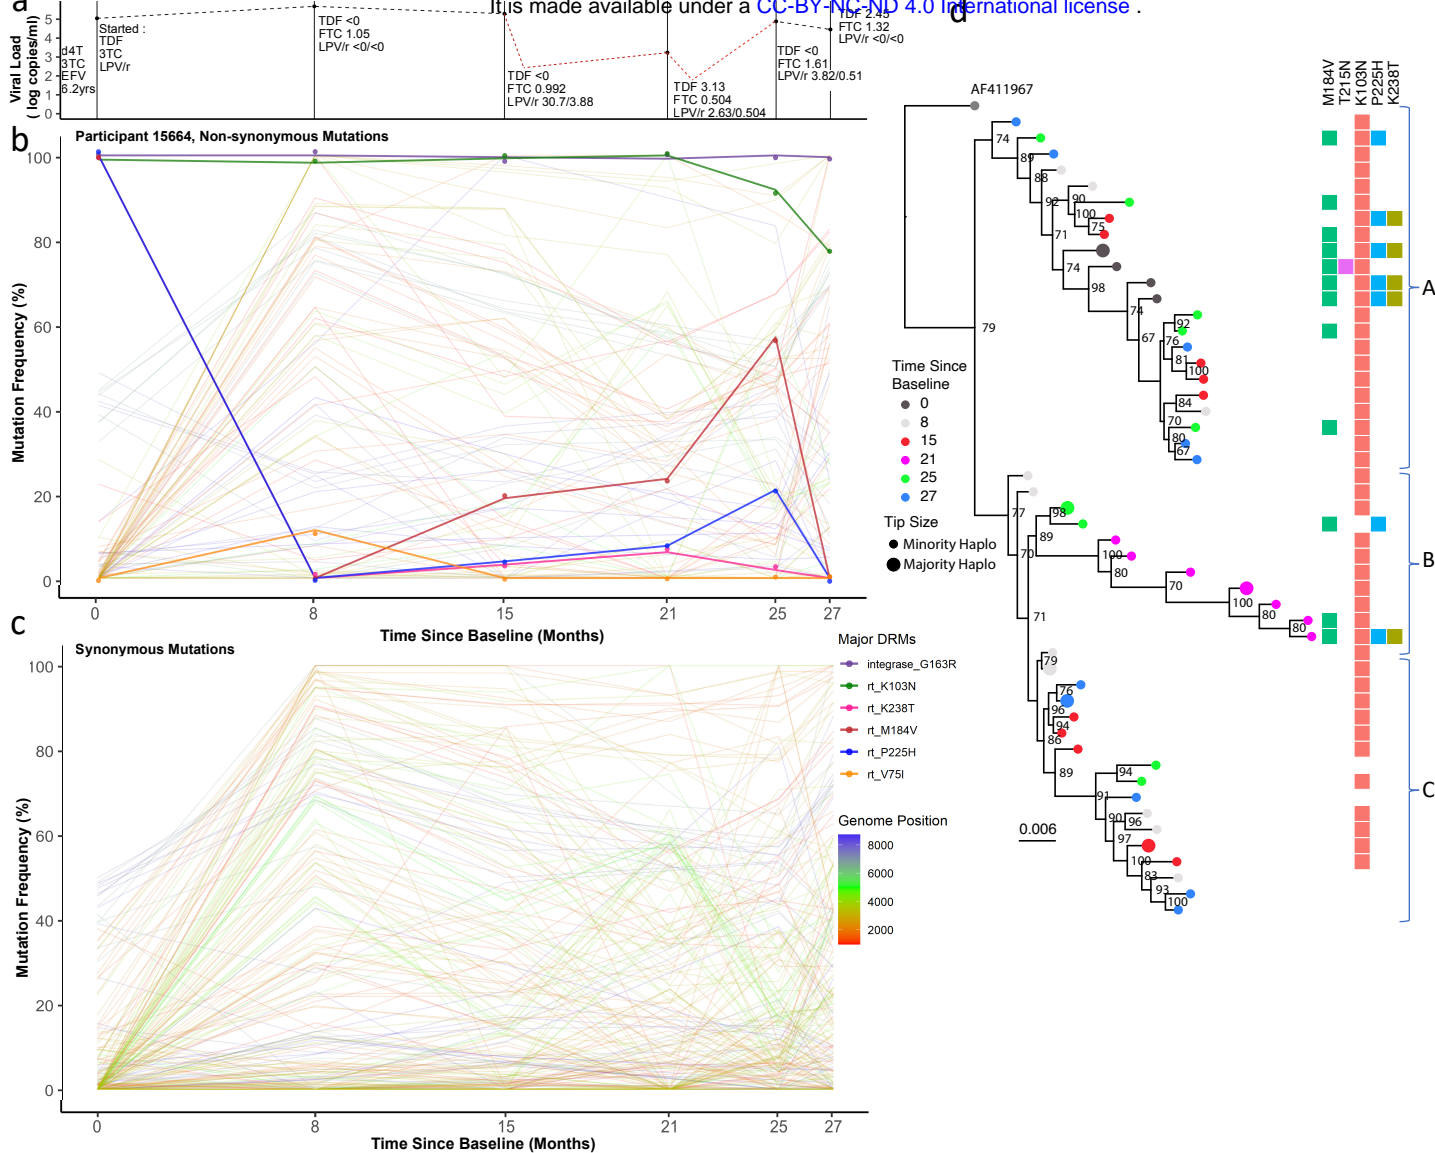

**Figure 4. Drug regimen, adherence and viral dynamics within participant 15664. a) Viral load and drug levels.** At successive timepoints drug regimen was noted and plasma drug concentration measured by HPLC (nmol/l). The participant was characterised by multiple partial suppression (<750 copies/ml, 16 months; <250 copies/ml, 22 months) and rebound events (red dotted line) and poor adherence to the drug regimen. **b) Drug resistance and non-drug resistance associated non-synonymous mutation frequencies by Illumina NGS.** The participant had large population shifts between timepoints 1-2, consistent with a hard selective sweep, coincident with the shift from 1<sup>st</sup>-line regimen to 2<sup>nd</sup>-line. **c) Synonymous mutation frequencies.** All mutations with a frequency of <10% or >90% at two or more timepoints were tracked over successive timepoints. Most changes were restricted to *gag* and *pol* regions and had limited shifts in frequency i.e. between 20-60%. **d) Maximum-likelihood phylogeny of reconstructed haplotypes.** Haplotypes largely segregated into three major clades (labelled A-C). Majority and minority haplotypes, some carrying lamivudine resistance mutation M184V. Clades referred to in the text body are shown to the right of the heatmap.

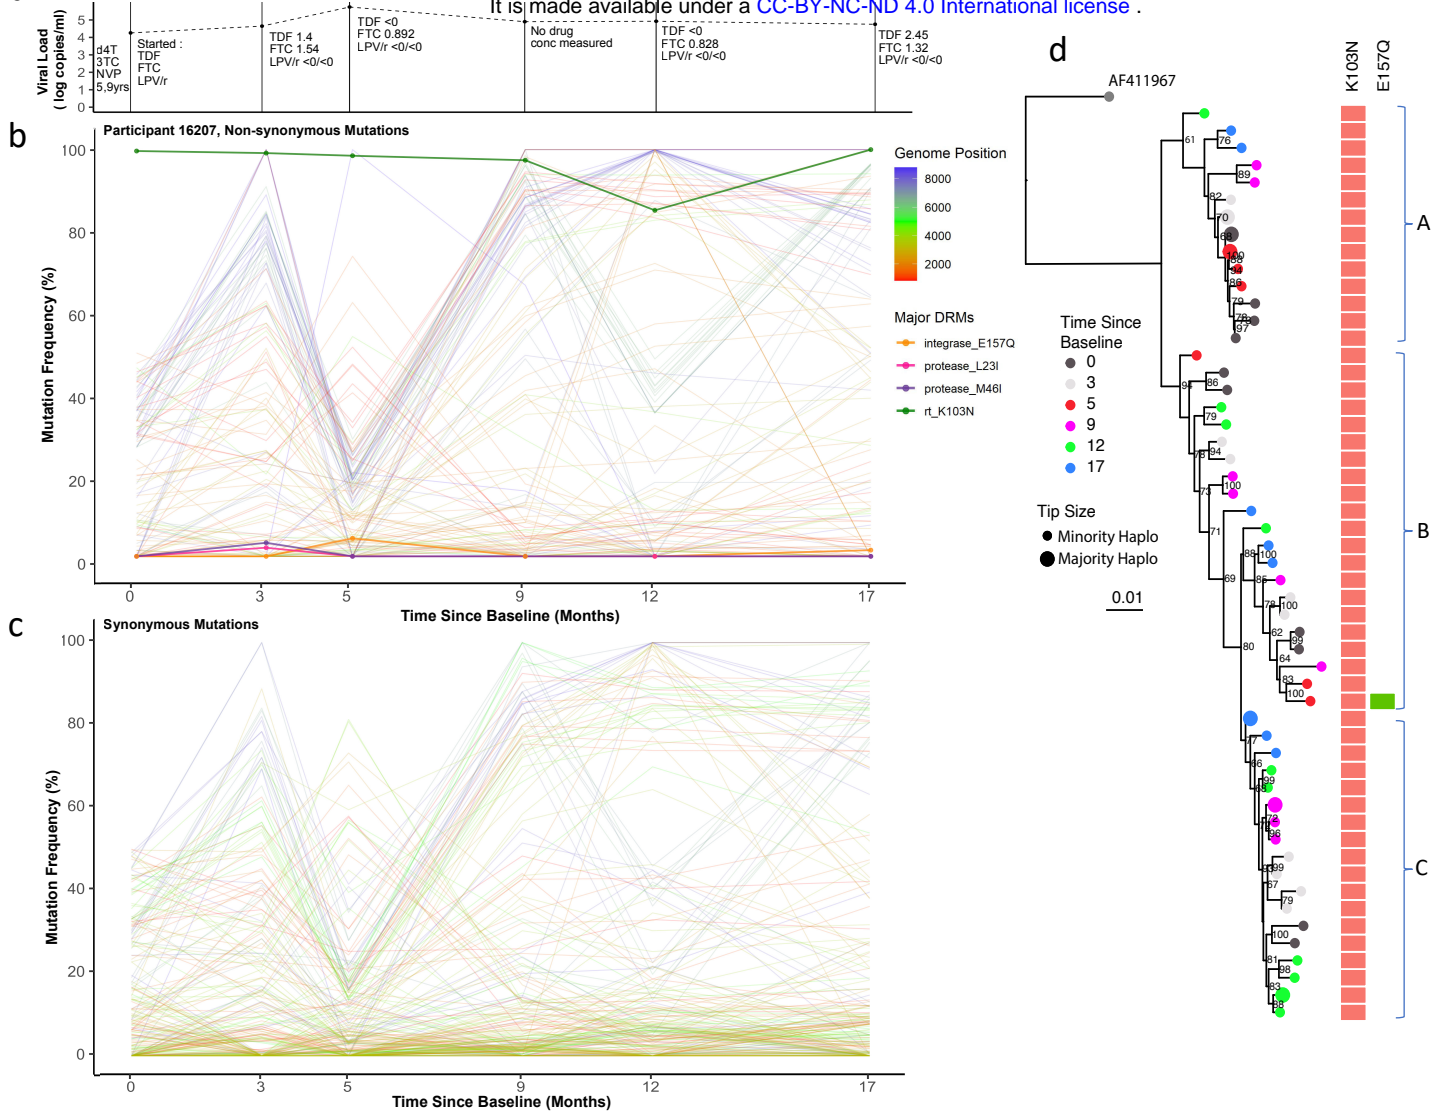

**Figure 5. Drug regimen, adherence and viral dynamics within participant 16207. A) Viral load and drug levels.** At successive timepoints regimen was noted and plasma drug concentration measured by HPLC (nmol/l). The participant displayed ongoing viraemia and poor adherence to the prescribed drug regimen. **B) Drug resistance and non-drug resistance associated non-synonymous mutations frequencies.** The participant had only one major RT mutation - K103N for the duration of the treatment period. Several antagonistic non-synonymous switches in predominantly *env* were observed between timepoints 1-4. **C) Synonymous mutation frequencies.** All mutations with a frequency of <10% or >90% at two or more timepoints were followed over successive timepoints. In contrast to non-synonymous mutations, most synonymous changes were in *pol*, indicative of linkage to the *env* coding changes. **D) Maximum-likelihood phylogeny of reconstructed haplotypes.** Haplotypes were again clearly divided into three distinct clades; each clade contained haplotypes from all timepoints, suggesting lack of hard selective sweeps and intermingling of viral haplotypes with softer sweeps. that most viral competition occurred outside of drug pressure.



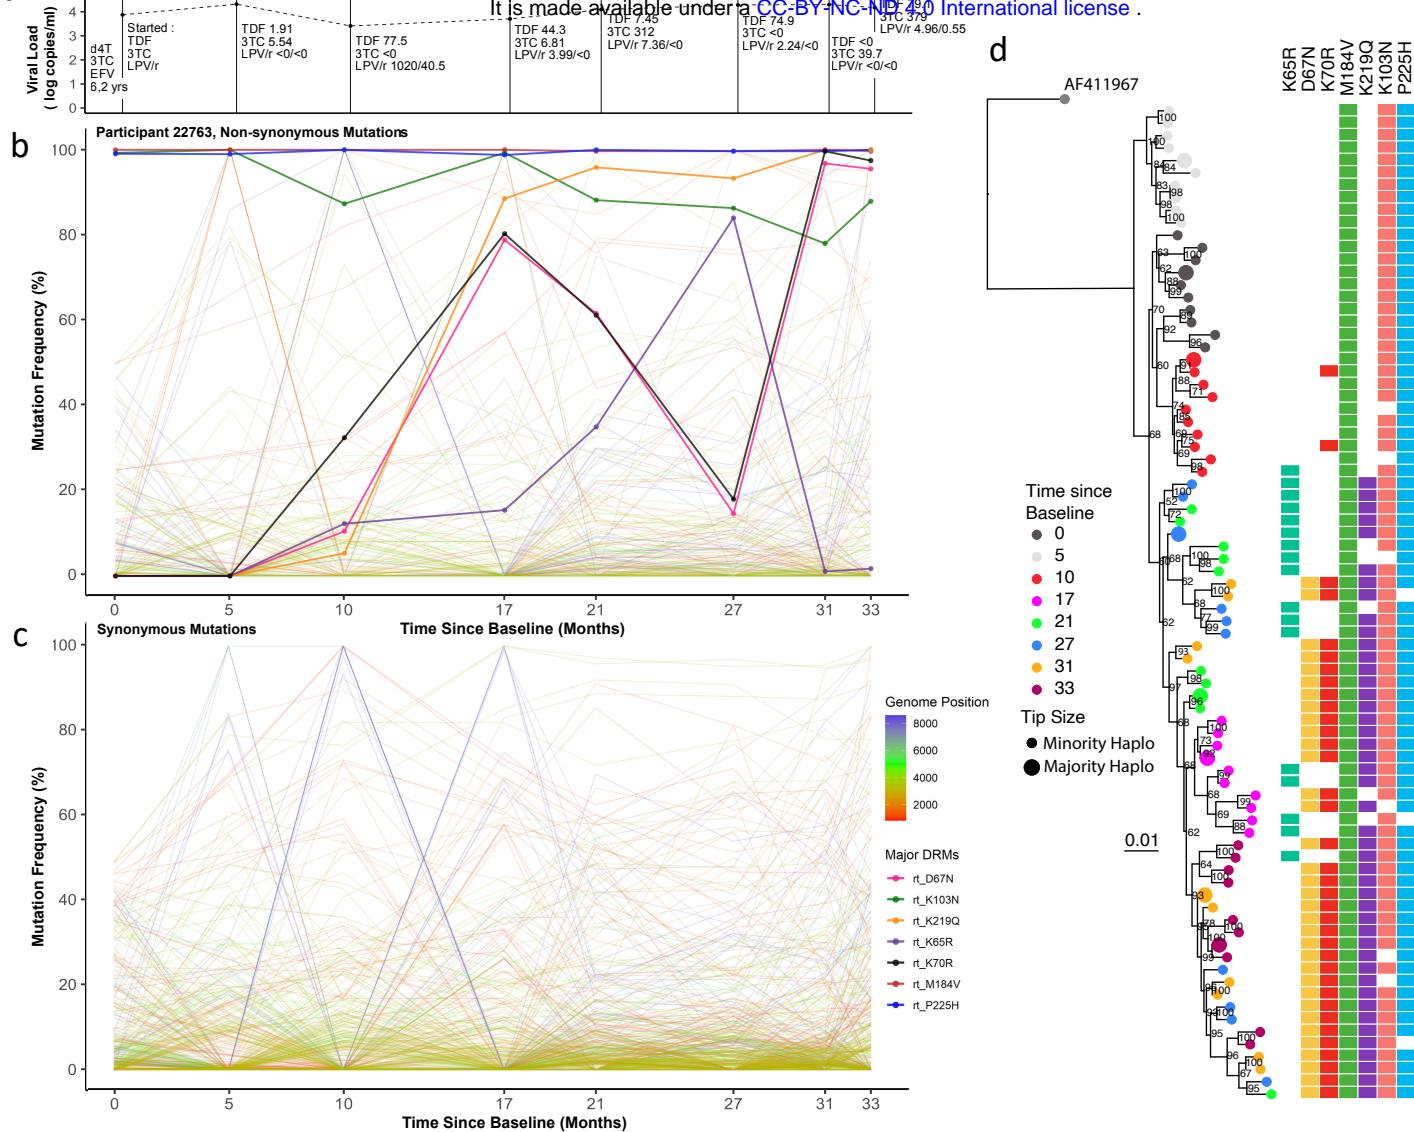

**Figure 6. Drug regimen, adherence and viral dynamics of participant 22763. A) Viral load and regimen adherence.** At successive timepoints the regimen was noted, and plasma drug concentration measured by HPLC (nmol/l). The participant had therapeutic levels of drug at several timepoints (3, 5 and 8), indicating variable adherence to the prescribed drug regimen. **B) Drug resistance and non-drug-resistance-associated non-synonymous mutation frequencies.** The participant had numerous drug resistance mutations in dynamic flux. Between timepoints 4-7, there was a complete population shift, indicated by reciprocal competition between the RT mutations K65R and the TAMs K67N and K70R. **C) Synonymous mutations frequencies.** All mutations with a frequency of <10% or >90% at two or more timepoints were followed over successive timepoints. Several *env* mutations mimicked the non-synonymous shifts observed between timepoints 2-4, suggestive of linkage. **D) Maximum-likelihood phylogeny of reconstructed haplotypes.** timepoints 1-4 were found in distinct lineages. In later timepoints, from 5-8, haplotypes became more intermingled, whilst maintaining antagonism between K65R and K67N bearing viruses.
